# Supplementary material for: Copper Catalysis with Arynes: Unlocking Site-Selective Arylation of Pyrazoles
Source: Research Square preprint supplement (doi:10.21203/rs.3.rs-6323411/v1), 2025-04-01
Supplement: Supplementary file 1 [file 46fd887ed7dff5206bbefc5d.docx]

Supplementary Information

**Copper Catalysis with Arynes: Unlocking Site-Selective Arylation of Pyrazoles**

Minghao Wang,1 Xintong Hou,1,3 Stephanie A. Corio,2,3 Lori Digal,1 Jennifer S. Hirschi,2 Vy M. Dong1

**Affiliations:**

1Department of Chemistry, University of California, Irvine; Irvine, California 92617, United States.

2Department of Chemistry, Binghamton University; Binghamton, New York 13902, United States.

3These authors contributed equally: Xintong Hou, Stephanie A. Corio.

E-mail: dongv@uci.edu; jhirschi@binghamton.edu.

Table of Contents

[1. Material and Methods 3](#_Toc193974537)

[2. Reaction Optimization 4](#_Toc193974538)

[2.1. Reaction Optimization to Access More Hindered Nitrogen Nα 4](#_Toc193974539)

[2.2. Reaction Optimization to Access Less Hindered Nitrogen Nβ 9](#_Toc193974540)

[2.3. Intrinsic Regioselectivity of Unsymmetric Pyrazoles under Non-catalytic Conditions 10](#_Toc193974541)

[3. General Procedure for Selective Addition of Unsymmetric Pyrazoles to Benzynes 12](#_Toc193974542)

[3.1. Procedure A - Addition of Benzynes to Nα with Kobayashi Precursor 12](#_Toc193974543)

[3.2. Procedure B - Addition of Benzynes to Nβ with Kobayashi Precursor 13](#_Toc193974544)

[3.3. Procedure C - Addition of Benzynes to Nα with Smith Precursor 14](#_Toc193974545)

[4. Product Charaterization 15](#_Toc193974546)

[5. Synthesis of CDPPB (7) and CDPPB-*N*-isomer (8) 34](#_Toc193974547)

[6. Synthesis and Reactivity of Cu-pyrazolate 36](#_Toc193974548)

[7. DFT Calculations 37](#_Toc193974549)

[7.1 General Information 37](#_Toc193974550)

[7.2. Analysis of the Cy-XantPhos (L1)-Controlled Nα-Arylation 38](#_Toc193974551)

[7.3. Analysis of 1,10-Phenanthroline (L5)-Controlled Nβ-Arylation 42](#_Toc193974552)

[7.2. XYZ Files for Computational Models 45](#_Toc193974553)

[8. X-Ray Crystallography Data 95](#_Toc193974554)

[9. General Procedure to Prepare Aryne Precursors 114](#_Toc193974555)

[10. NMR Spectra 116](#_Toc193974556)

[11. References and Notes 185](#_Toc193974557)

# Material and Methods

Commercial reagents were purchased from Combi-Block, Sigma Aldrich, Strem, Alfa Aesar, Ambeed, Synthonix, Synquest, Oakwood, or TCI and used without further purification. All pyrazole starting materials are from commercial sources without further purification. Acetonitrile (MeCN) (anhydrous >99.9% from Sigma Aldrich) were degassed and stored over 3Å MS within a N2 filled glove box. All experiments were performed in oven-dried or flame-dried glassware under an atmosphere of N2 or in a glove box with a N2 atmosphere. Reactions were monitored using thin-layer chromatography (TLC; EMD Silica Gel 60 F254 plates). Visualization of the developed plates was performed under UV light (254 nm) or with a KMnO4 stain. Organic solutions were concentrated under reduced pressure on a Büchi rotary evaporator. Purification and isolation of products was performed via silica gel chromatography (flash column chromatography or preparative thin-layer chromatography). Column chromatography was performed with Silicycle Silia-P Flash Silica Gel using glass columns. 1H, 13C, 19F NMR spectra and NOE experiments were recorded on a Bruker AVANCE-600, GN-500 or DRX-400 spectrometer. 1H NMR spectra were internally referenced to the residual solvent signal. 13C NMR spectra were internally referenced to the residual solvent signal. Data for 1H NMR are reported as follows: chemical shift (δ ppm), multiplicity (s = singlet, d = doublet, t = triplet, q = quartet, m = multiplet, br = broad), coupling constant (Hz), integration. Data for 13C and 19F NMR are reported in terms of chemical shift (δ ppm). Infrared (IR) spectra were obtained on a Nicolet iS5 FT-IR spectrometer equipped with an iD5 ATR accessory and are reported in terms of frequency of absorption (cm-1). High resolution mass spectra (HRMS) were obtained by the University of California, Irvine Mass Spectrometry Center on a Micromass 70S-250 Spectrometer (EI) or an ABI/Sciex QStar Mass Spectrometer (ESI).

# Reaction Optimization

## Reaction Optimization to Access More Hindered Nitrogen Nα

**General Procedure for Table S1-8:** In a N2 filled glovebox, to a 1-dram vial equipped with a magnetic stir bar was added Cu catalyst (2.5-10 mol%), phosphine ligand and acetonitrile. After stirring for 30 min, pyrazole **1a** (0.05 mmol, 1.0 equiv.) and base (0.2-1.0 equiv.) were added. The resulting mixture was stirred for another 30 min followed by the addition of 2-(trimethylsilyl)phenyl trifluoromethanesulfonate (**2a**)(1.0-1.5 equiv.) and CsF (2.0-4.0 equiv.). The vial was sealed with a Teflon-lined screw cap and stirred at 30 °C for 12-24 hours. The mixture was concentrated in vacuo. Regioselectivity (rr) was determined by 1H NMR analysis of the crude mixture. Reaction yield (%) was determined by 1H NMR analysis of the crude mixture with internal standard trimethoxy benzene.

**Table S1. Evaluation of Cu Source**

**Table S2. Evaluation of F Source**

**Table S3. Evaluation of Base Additive**

**Table S4. Evaluation of Ligand**

**Table S5. Evaluation of CsF Loading and Reaction Concentration**

**Table S6. Evaluation of TMG Loading and Catalyst Loading**

**Table S7. Evaluation of Ligand for Smaller Substituents on Pyrazoles**

**Table S8. Evaluation of Base Additive for Smaller Substituents on Pyrazoles**

**Table S9. Evaluation of Ligand for Substituted Aryne Precursors**

## Reaction Optimization to Access Less Hindered Nitrogen Nβ

**General Procedure for Table S10-11:** In a N2 filled glovebox, to a 1-dram vial equipped with a magnetic stir bar was added [Cu(CH3CN)4]PF6 (2.5-10 mol%), ligand (3-12 mol%) and acetonitrile. After stirring for 30 min, pyrazole **1a** (0.1 mmol, 1.0 equiv.), 2-(trimethylsilyl)phenyl trifluoromethanesulfonate (**2a**)(0.15 mmol, 1.5 equiv.) and CsF (0.2 mmol, 2.0 equiv.) were added. The vial was sealed with a Teflon-lined screw cap and stirred at 30 °C for 12-24 hours. The mixture was concentrated in vacuo. Regioselectivity (rr) was determined by 1H NMR analysis of the crude mixture. Reaction yield (%) was determined by 1H NMR analysis of the crude mixture with internal standard trimethoxy benzene.

**Table S10. Evaluation of Ligand**

**Table S11. Evaluation of Catalyst Loading and Concentration**

## Intrinsic Regioselectivity of Unsymmetric Pyrazoles under Non-catalytic Conditions

**General Procedure for Table S12:** In a N2 filled glovebox, to a 1-dram vial equipped with a magnetic stir bar was added pyrazole **1** (0.1 mmol, 1.0 equiv.), 2-(trimethylsilyl)phenyl trifluoromethanesulfonate (**2a**)(0.15 mmol, 1.5 equiv.), CsF (0.2 mmol, 2.0 equiv.) and acetonitrile. The vial was sealed with a Teflon-lined screw cap and stirred at 30 °C for 12-24 hours. The mixture was concentrated in vacuo. Regioselectivity (rr) was determined by 1H NMR analysis of the crude mixture. Reaction yield (%) was determined by 1H NMR analysis of the crude mixture with internal standard trimethoxy benzene.

**Table S12. Summary of Blank Experiments**

# General Procedure for Selective Addition of Unsymmetric Pyrazoles to Benzynes

## Procedure A - Addition of Benzynes to Nα with Kobayashi Precursor

In a N2 filled glovebox, to a 1-dram vial equipped with a magnetic stir bar was added [Cu(CH3CN)4]PF6 (1.9 mg, 0.005 mmol, 10 mol%), phosphine ligand (0.006 mmol, 12 mol%) and acetonitrile (1.0 mL, 0.05 M). After stirring for 30 min, pyrazole **1** (0.05 mmol, 1.0 equiv.) and 1,1,3,3-tetramethylguanidine (TMG, 2.9 mg, 0.025 mmol, 0.5 equiv.) were added. The resulting mixture was stirred for another 30 min followed by the addition of 2-(trimethylsilyl)phenyl trifluoromethanesulfonate (**2**)(0.075 mmol, 1.5 equiv.) and CsF (15.2 mg, 0.1 mmol, 2.0 equiv.). The vial was sealed with a Teflon-lined screw cap and stirred at 30 °C for 12 hours. If TLC shows majority of pyrazole **1** was left, 2-(trimethylsilyl)phenyl trifluoromethanesulfonate (**2**)(0.075 mmol, 1.5 equiv.) and CsF (15.2 mg, 0.1 mmol, 2.0 equiv.) were added again and the mixture was stirred another 12 hours at 30 °C. The mixture was concentrated in vacuo. Regioselectivity (rr) was determined by 1H NMR analysis of the crude mixture. Nα- or Nβ-arylated regioisomer was determined by 1H NMR chemical shifts and NOE experiments. Pyrazole product **3** was isolated by preparatory TLC.

## Procedure B - Addition of Benzynes to Nβ with Kobayashi Precursor

In a N2 filled glovebox, to a 1-dram vial equipped with a magnetic stir bar was added [Cu(CH3CN)4]PF6 (1.9 mg, 0.005 mmol, 5 mol%), 1,10-phenanthroline (**L5**) (1.1 mg, 0.006 mmol, 6 mol%) and acetonitrile (0.4 mL, 0.25 M). After stirring for 30 min, pyrazole **2** (0.1 mmol, 1.0 equiv.), 2-(trimethylsilyl)phenyl trifluoromethanesulfonate (**1**)(0.15 mmol, 1.5 equiv.) and CsF (30.4 mg, 0.2 mmol, 2.0 equiv.) were added. The vial was sealed with a Teflon-lined screw cap and stirred at 30 °C for 12 hours. If TLC shows majority of pyrazole **2** was left, 2-(trimethylsilyl)phenyl trifluoromethanesulfonate (**2**)(0.15 mmol, 1.5 equiv.) and CsF (30.4 mg, 0.2 mmol, 2.0 equiv.) were added again and the mixture was stirred another 12 hours at 30 °C. The mixture was concentrated in vacuo. Regioselectivity (rr) was determined by 1H NMR analysis of the crude mixture. Nα- or Nβ-arylated regioisomer was determined by 1H NMR chemical shifts and NOE experiments. Pyrazole product **4** was isolated by preparatory TLC.

## Procedure C - Addition of Benzynes to Nα with Smith Precursor

In a N2 filled glovebox, to a 1-dram vial equipped with a magnetic stir bar was added [Cu(CH3CN)4]PF6 (1.9 mg, 0.005 mmol, 10 mol%), phosphine ligand (0.006 mmol, 12 mol%) and acetonitrile (1.0 mL, 0.05 M). After stirring for 30 min, pyrazole **1** (0.05 mmol, 1.0 equiv.) was added. The resulting mixture was stirred for another 30 min followed by the addition of smith oxonium aryne precursor (**6**)(0.075 mmol, 1.5 equiv.) and K3PO4 (21.2 mg, 0.1 mmol, 2.0 equiv.). The vial was sealed with a Teflon-lined screw cap and stirred at 30 °C for 12 hours. The mixture was concentrated in vacuo. Regioselectivity (rr) was determined by 1H NMR analysis of the crude mixture. Nα- or Nβ-arylated regioisomer was determined by 1H NMR chemical shifts and NOE experiments. Pyrazole product **3** was isolated by preparatory TLC.

# Product Charaterization

**1,5-Diphenyl-1*H*-pyrazole (3a)**

The title compound was synthesized according to general procedure A with **L1** and isolated by preparatory TLC (90:10 hexanes:EtOAc) as yellow oil [10 mg, 92% yield, >20:1 N⍺:Nβ].**1H NMR** (600 MHz, CDCl3) δ 7.73 (d, J = 1.9 Hz, 1H), 7.44 – 7.27 (m, 8H), 7.26 – 7.17 (m, 2H), 6.52 (d, J = 1.8 Hz, 1H). **13C NMR** (151 MHz, CDCl3) δ 143.10, 140.41, 140.23, 130.71, 128.99, 128.87, 128.55, 128.29, 127.51, 125.31, 107.95. The NMR data matches literature report.51

**5-Methyl-1-phenyl-1*H*-pyrazole (3b)**

The title compound was synthesized according to general procedure A with **L2** and isolated by preparatory TLC (90:10 hexanes:EtOAc) as white solid [1.3 mg, 16% yield, 4:1 N⍺:Nβ]. **1H NMR** (400 MHz, CDCl3) δ 7.81 (s, 1H), 7.69 – 7.59 (m, 2H), 7.43 (t, J = 7.8 Hz, 2H), 7.25 (t, J = 7.4 Hz, 1H), 6.25 (s, 1H), 2.39 (s, 3H). **13C NMR** (151 MHz, CDCl3) δ 139.51, 139.30, 138.20, 129.25, 128.21, 125.14, 107.14, 12.52. The NMR data matches literature report.51

**5-Cyclopropyl-1-phenyl-1*H*-pyrazole (3c)**

The title compound was synthesized according to general procedure A with **L2** and isolated by preparatory TLC (90:10 hexanes:EtOAc) as yellow oil [3.7 mg, 40% yield, 4:1 N⍺:Nβ]. **1H NMR** (500 MHz, CDCl3) δ 7.64 – 7.60 (m, 1H), 7.49 (t, J = 7.8 Hz, 2H), 7.40 (t, J = 7.5 Hz, 1H), 5.99 (d, J = 2.0 Hz, 1H), 1.82 (tt, J = 8.3, 5.1 Hz, 1H), 1.05 – 0.98 (m, 2H), 0.85 – 0.75 (m, 2H).**13C NMR** (151 MHz, CDCl3) δ 146.63, 139.46, 139.38, 129.24, 128.02, 125.07, 102.95, 29.84, 9.21, 7.85. **IR** (ATR): 3011, 2927, 2854, 1597, 1501, 1392, 1030, 926, 763, 695 cm-1. **HRMS** calculated for C12H12N2 [M+H]+ 185.1079, found 185.1088.

**5-Isopropyl-1-phenyl-1*H*-pyrazole (3d)**

The title compound was synthesized according to general procedure A with **L2** and isolated by preparatory TLC (90:10 hexanes:EtOAc) as white solid [4.6 mg, 49% yield, 7:1 N2:N1]. **1H NMR** (499 MHz, CDCl3) δ 7.58 (d, J = 1.8 Hz, 1H), 7.50 – 7.45 (m, 2H), 7.44 – 7.39 (m, 3H), 6.22 (d, J = 1.9 Hz, 1H), 3.06 (sept, J = 6.5 Hz, 1H), 1.19 (d, J = 6.8 Hz, 7H). **13C NMR** (151 MHz, CDCl3) δ 150.45, 140.30, 139.89, 129.26, 128.21, 126.06, 102.92, 25.58, 23.16. **IR** (ATR): 3065, 2966, 1598, 1502, 1395, 1007, 925, 764, 692 cm-1. **HRMS** calculated for C12H14N2 [M+Na]+ 209.1055, found 209.1046.

**5-(Tert-butyl)-1-phenyl-1*H*-pyrazole (3e)**

The title compound was synthesized according to general procedure A with **L1** and isolated by preparatory TLC (90:10 hexanes:EtOAc) as white solid [4.5 mg, 45% yield, >20:1 N⍺:Nβ]. **1H NMR** (600 MHz, CDCl3) δ 7.52 (d, J = 1.9 Hz, 1H), 7.48 – 7.43 (m, 3H), 7.41 – 7.37 (m, 2H), 6.19 (d, J = 2.0 Hz, 1H), 1.19 (s, 9H). **13C NMR** (151 MHz, CDCl3) δ 153.29, 142.31, 138.60, 129.26, 128.80, 128.76, 103.91, 32.05, 30.90. The NMR data matches literature report.52

**5-Bromo-1-phenyl-1*H*-pyrazole (3f)**

The title compound was synthesized according to general procedure A in 0.1 mmol scale of pyrazole **2** with **L2** and isolated by preparatory TLC (90:10 hexanes:EtOAc) as brown solid [4.5 mg, 40% yield, 5:1 N⍺:Nβ]. **1H NMR** (400 MHz, CDCl3) δ 7.68 (d, J = 1.8 Hz, 1H), 7.58 – 7.53 (m, 2H), 7.52 – 7.41 (m, 3H), 6.48 (d, J = 1.8 Hz, 1H). **13C NMR** (151 MHz, CDCl3) δ 141.57 , 139.09 , 129.06 , 128.65, 125.82, 112.94, 110.56. **IR** (ATR): 3132, 2924, 2853, 1598, 1502, 1416, 1394, 1092, 967, 918, 779, 755 cm-1. **HRMS** calculated for C9H7BrN2 [M+H]+ 222.9871, found 222.9867.

**5-Iodo-1-phenyl-1*H*-pyrazole (3g)**

The title compound was synthesized according to general procedure A in 0.1 mmol scale of pyrazole **2** with **L2** and isolated by preparatory TLC (90:10 hexanes:EtOAc) as brown oil [4.1 mg, 30% yield, 10:1 N⍺:Nβ]. **1H NMR** (400 MHz, CDCl3) δ 7.69 (d, J = 1.8 Hz, 1H), 7.54 – 7.42 (m, 5H), 6.63 (d, J = 1.8 Hz, 1H). **13C NMR** (151 MHz, CDCl3) δ 142.79, 140.24, 129.01, 128.81, 126.44, 117.58, 80.94.The NMR data matches literature report.53

**1-Phenyl-5-(o-tolyl)-1*H*-pyrazole (3h)**

The title compound was synthesized according to general procedure A with **L2** and isolated by preparatory TLC (90:10 hexanes:EtOAc) as colorless oil [9.8 mg, 84% yield, 13:1 N⍺:Nβ]. **1H NMR** (600 MHz, CDCl3) δ 7.75 (d, J = 1.8 Hz, 1H), 7.28 (td, J = 7.4, 1.8 Hz, 1H), 7.26 – 7.16 (m, 8H), 6.41 (d, J = 1.8 Hz, 1H), 1.98 (s, 3H). **13C NMR** (151 MHz, CDCl3) δ 142.31, 140.28, 140.20, 137.24, 130.95, 130.67, 130.48, 129.05, 128.88, 126.96, 125.95, 123.72, 108.90, 20.04. I**R** (ATR): 2923, 1599, 1497, 1451, 1380, 960, 924, 758, 690, 651 cm-1. **HRMS** calculated for C16H14N2 [M+H]+ 235.1235, found 235.1242.

**5-(2-Fluorophenyl)-1-phenyl-1*H*-pyrazole (3i)**

The title compound was synthesized according to general procedure A with **L2** and isolated by preparatory TLC (90:10 hexanes:EtOAc) as white solid [11 mg, 95% yield, >20:1 N⍺:Nβ]. **1H NMR** (600 MHz, CDCl3) δ 7.77 (d, J = 1.9 Hz, 1H), 7.36 – 7.27 (m, 6H), 7.20 (td, J = 7.5, 1.8 Hz, 1H), 7.10 (td, J = 7.6, 1.2 Hz, 1H), 7.05 (ddd, J = 9.7, 8.3, 1.2 Hz, 1H), 6.57 (s, 1H).**13C NMR** (151 MHz, CDCl3) δ 159.50 (d, J = 249.9 Hz), 140.41, 140.27, 136.81, 131.47 (d, J = 2.4 Hz), 130.69 (d, J = 8.2 Hz), 129.01, 127.53, 124.42, 124.27 (d, J = 3.8 Hz), 118.97 (d, J = 14.9 Hz), 116.23 (d, J = 21.6 Hz), 109.51 (d, J = 2.0 Hz). **19F NMR** (565 MHz, CDCl3) δ -112.82. I**R** (ATR): 2925, 1598, 1499, 1385, 1229, 1217, 964, 925, 756, 692 cm-1. **HRMS** calculated for C15H11FN2 [M+H]+ 239.0984, found 239.0983.

**5-(2-Bromophenyl)-1-phenyl-1*H*-pyrazole (3j)**

The title compound was synthesized according to general procedure A with **L2** and isolated by preparatory TLC (90:10 hexanes:EtOAc) as colorless oil [13 mg, 90% yield, >20:1 N⍺:Nβ]. **1H NMR** (600 MHz, CDCl3) δ 7.77 (d, J = 1.9 Hz, 1H), 7.59 (dd, J = 7.9, 1.3 Hz, 1H), 7.34 – 7.18 (m, 8H), 6.52 (d, J = 1.9 Hz, 1H).**13C NMR** (151 MHz, CDCl3) δ 141.37, 140.03, 133.26, 132.54, 132.35, 130.46, 130.42, 128.90, 127.42, 127.26, 124.23, 124.19, 109.48. The NMR data matches literature report.54

**5-(2-Methoxyphenyl)-1-phenyl-1*H*-pyrazole (3k)**

The title compound was synthesized according to general procedure A with **L1** and isolated by preparatory TLC (90:10 hexanes:EtOAc) as colorless oil [6.8 mg, 54% yield, 5:1 N⍺:Nβ]. **1H NMR** (600 MHz, CDCl3) δ 7.74 (d, J = 1.8 Hz, 1H), 7.34 (ddd, J = 8.3, 7.5, 1.8 Hz, 1H), 7.30 – 7.26 (m, 3H), 7.26 (d, J = 3.2 Hz, 2H), 7.24 – 7.18 (m, 1H), 6.97 (td, J = 7.5, 1.0 Hz, 1H), 6.79 (dd, J = 8.4, 1.0 Hz, 1H), 6.47 (d, J = 1.8 Hz, 1H), 3.36 (s, 3H).**13C NMR** (151 MHz, CDCl3) δ 156.59, 141.13, 140.05, 140.00, 131.37, 130.54, 128.64, 126.96, 123.73, 120.80, 120.23, 111.38, 108.84, 55.05. I**R** (ATR): 3200, 2928, 2365, 1499, 1385, 1261, 1248, 1024, 925, 790, 756, 691 cm-1.

**1-Phenyl-5-(p-tolyl)-1*H*-pyrazole (3l)**

The title compound was synthesized according to general procedure A with **L2** and isolated by preparatory TLC (90:10 hexanes:EtOAc) as white solid [11.2 mg, 96% yield, 18:1 N⍺:Nβ]. **1H NMR** (400 MHz, CDCl3) δ 7.73 (d, J = 1.8 Hz, 1H), 7.38 – 7.27 (m, 6H), 7.15 – 7.07 (m, 4H), 6.49 (d, J = 1.9 Hz, 1H), 2.34 (s, 3H). **13C NMR** (151 MHz, CDCl3) δ 143.44, 140.07, 139.99, 138.46, 129.34, 129.05, 128.76, 127.69, 127.55, 125.41, 107.71, 21.39. **IR** (ATR): 3125, 3063, 2921, 1597, 1498, 1384, 961, 925, 823, 785, 761, 701 cm-1. **HRMS** calculated for C16H14N [M+H]+ 235.1235, found 235.1233.

**5-(4-Chlorophenyl)-1-phenyl-1*H*-pyrazole (3m)**

The title compound was synthesized according to general procedure A with **L2** and isolated by preparatory TLC (90:10 hexanes:EtOAc) as white solid [7.6 mg, 60% yield, 15:1 N⍺:Nβ]. **1H NMR** (400 MHz, CDCl3) δ 7.74 (d, J = 1.9 Hz, 1H), 7.40 – 7.32 (m, 3H), 7.31 – 7.26 (m, 4H), 7.19 – 7.13 (m, 2H), 6.51 (d, J = 1.9 Hz, 1H).**13C NMR** (151 MHz, CDCl3) δ 142.11, 140.29, 139.72, 134.57, 130.11, 129.23, 129.05, 128.93, 127.97, 125.42, 108.08. **IR** (ATR): 3063, 2923, 2851, 1598, 1499, 1483, 1407, 1382, 1093, 1016, 960, 925, 690, 655, 759, 629 cm-1. **HRMS** calculated for C15H11ClN2 [M+H]+ 255.0689, found 255.0680. The NMR data matches literature report.55

**5-(4-Fluorophenyl)-1-phenyl-1*H*-pyrazole (3n)**

The title compound was synthesized according to general procedure A with **L2** and isolated by preparatory TLC (90:10 hexanes:EtOAc) as white solid [10.5 mg, 88% yield, >20:1 N⍺:Nβ]. **1H NMR** (400 MHz, CDCl3) δ 7.73 (d, J = 1.9 Hz, 1H), 7.39 – 7.27 (m, 5H), 7.24 – 7.17 (m, 2H), 7.03 – 6.96 (m, 2H), 6.49 (d, J = 1.9 Hz, 1H). **13C NMR** (151 MHz, CDCl3) δ 162.76 (d, J = 248.8 Hz), 142.29, 140.24, 139.81, 130.72 (d, J = 8.2 Hz), 129.16, 127.85, 126.68 (d, J = 3.4 Hz), 125.40, 115.77 (d, J = 21.6 Hz), 107.93. **19F NMR** (376 MHz, CDCl3) δ -113.18. **IR** (ATR): 3066, 2923, 1594, 1500, 1448, 1383, 1210, 835, 789, 768, 721, 607 cm-1. **HRMS** calculated for C15H11FN2 [M+H]+ 239.0984, found 239.0993. The NMR data matches literature report.56

**5-(4-Methoxyphenyl)-1-phenyl-1*H*-pyrazole (3o)**

The title compound was synthesized according to general procedure A with **L2** and isolated by preparatory TLC (90:10 hexanes:EtOAc) as colorless oil [7.0 mg, 56% yield, 15:1 N⍺:Nβ]. **1H NMR** (600 MHz, CDCl3) δ 7.70 (d, J = 1.8 Hz, 1H), 7.36 – 7.27 (m, 5H), 7.15 (d, J = 8.7 Hz, 2H), 6.83 (d, J = 8.7 Hz, 2H), 6.45 (d, J = 1.8 Hz, 1H), 3.80 (s, 3H).**13C NMR** (151 MHz, CDCl3) δ 159.64, 142.96, 140.38, 130.17, 129.00, 127.44, 125.34, 123.16, 114.03, 107.45, 55.39. The NMR data matches literature report.55

**5-(3-Methoxyphenyl)-1-phenyl-1*H*-pyrazole (3p)**

The title compound was synthesized according to general procedure A with **L1** and isolated by preparatory TLC (90:10 hexanes:EtOAc) as yellow oil [6.8 mg, 54% yield, 6:1 N⍺:Nβ]. **1H NMR** (600 MHz, CDCl3) δ 7.72 (d, J = 1.9 Hz, 1H), 7.39 – 7.28 (m, 5H), 7.21 (t, J = 7.9 Hz, 1H), 6.85 (ddd, J = 8.3, 2.6, 0.9 Hz, 1H), 6.82 (ddd, J = 7.6, 1.6, 0.9 Hz, 1H), 6.75 (dd, J = 2.6, 1.6 Hz, 1H), 6.52 (d, J = 1.9 Hz, 1H), 3.67 (s, 3H).**13C NMR** (151 MHz, CDCl3) δ 159.54, 143.03, 140.35, 140. 21, 131.88, 129.65, 129.03, 127.64, 125.41, 121.35, 114.25, 114.21, 107.94, 55.29. The NMR data matches literature report.54

**5-(Furan-2-yl)-1-phenyl-1*H*-pyrazole (3q)**The title compound was synthesized according to general procedure A with **L1** and isolated by preparatory TLC (80:20 hexanes:EtOAc) as brown oil [8.9 mg, 85% yield, 7:1 N⍺:Nβ]. **1H NMR** (500 MHz, CDCl3) δ 7.69 (d, J = 1.9 Hz, 1H), 7.48 – 7.40 (m, 5H), 7.39 (dd, J = 1.8, 0.6 Hz, 1H), 6.67 (d, J = 1.9 Hz, 1H), 6.33 (dd, J = 3.4, 1.8 Hz, 1H), 5.97 (d, J = 3.4 Hz, 1H). **13C NMR** (151 MHz, CDCl3) δ 144.69 (s), 142.63 (s), 140.41 (s), 140.38 (s), 134.50 (s), 129.17 (s), 128.58 (s), 125.96 (s), 111.34 (s), 108.89 (s), 106.36 (s). **IR** (ATR): 3128, 2923, 2852, 1501, 1393, 1218, 1071, 977, 926, 763, 694 cm-1. **HRMS** calculated for C13H10N2O [M+H]+ 211.0871, found 211.0865.

**4-(1-Phenyl-1*H*-pyrazol-5-yl)pyridine (3r)**

The title compound was synthesized according to general procedure A with **L2** and isolated by preparatory TLC (80:20 hexanes:EtOAc) as yellow oil [7.4 mg, 67% yield, >20:1 N⍺:Nβ]. **1H NMR** (600 MHz, CDCl3) δ 8.55 (d, J = 5.3 Hz, 2H), 7.78 (d, J = 1.9 Hz, 1H), 7.46 – 7.37 (m, 3H), 7.33 – 7.27 (m, 2H), 7.23 – 7.18 (m, 2H), 6.70 (d, J = 1.9 Hz, 1H). **13C NMR** (151 MHz, CDCl3) δ 148.50, 140.90, 139.73, 139.68, 139.57, 129.54, 128.62, 125.56, 123.22, 109.42. **IR** (ATR): 3365, 2923, 1601, 1498, 1386, 924, 763, 693cm-1. **HRMS** calculated for C14H11N3 [M+H]+ 222.1031, found 222.1020.

**3-Methyl-1,5-diphenyl-1*H*-pyrazole (3s)**

The title compound was synthesized according to general procedure A with **L2** and isolated by preparatory TLC (90:10 hexanes:EtOAc) as colorless oil [8.7 mg, 74% yield, >20:1 N⍺:Nβ]. **1H NMR** (400 MHz, CDCl3) δ 7.35 – 7.17 (m, 11H), 6.32 (s, 1H), 2.40 (s, 3H). **13C NMR** (151 MHz, CDCl3) δ 149.35, 144.22, 139.54, 130.37, 129.10, 128.80, 128.62, 128.52, 127.67, 125.41, 107.90, 13.47. The NMR data matches literature report.51

**5-(Tert-butyl)-3-methyl-1-phenyl-1*H*-pyrazole (3t)**

The title compound was synthesized according to general procedure A with **L1** and isolated by preparatory TLC (90:10 hexanes:EtOAc) as colorless oil [9.6 mg, 90% yield, >20:1 N⍺:Nβ]. **1H NMR** (400 MHz, CDCl3) δ 7.49 – 7.40 (m, 3H), 7.39 – 7.34 (m, 2H), 5.98 (s, 1H), 2.28 (s, 3H), 1.17 (s, 9H). **13C NMR** (151 MHz, CDCl3) δ 154.29, 147.47, 142.00, 129.23, 128.99, 128.79, 103.92, 32.09, 30.87, 13.40. **IR** (ATR): 2968, 2929, 1593, 1537, 1500, 1362, 1017, 1007, 774, 729, 696 cm-1. **HRMS** calculated for C14H18N2 [M+Na]+ 237.1368, found 237.1369.

**5-(Tert-butyl)-3-iodo-1-phenyl-1*H*-pyrazole (3u)**

The title compound was synthesized according to general procedure A with **L1** and isolated by preparatory TLC (90:10 hexanes:EtOAc) as white solid [11.0 mg, 67% yield, >20:1 N⍺:Nβ]. **1H NMR** (400 MHz, CDCl3) δ 7.47 – 7.41 (m, 3H), 7.38 – 7.34 (m, 2H), 6.33 (s, 1H), 1.16 (s, 9H). **13C NMR** (151 MHz, CDCl3) δ 155.59, 141.49, 129.63, 128.87, 128.86, 112.99, 95.29, 32.13, 30.70. **IR** (ATR): 3135, 2966, 2927, 1500, 1362, 1337, 1257, 1005, 949, 785, 774, 706, 695 cm-1. **HRMS** calculated for C13H15IN2 [M+Na]+ 349.0178, found 349.0175.

**1,5-Diphenyl-1*H*-pyrazol-3-amine (3v)**

The title compound was synthesized according to general procedure A with **L1** and isolated by preparatory TLC (80:20 hexanes:EtOAc) as white solid [6.8 mg, 58% yield, 7:1 N⍺:Nβ]. **1H NMR** (600 MHz, CDCl3) δ 7.31 – 7.27 (m, 5H), 7.25 – 7.19 (m, 5H), 5.93 (s, 1H), 2.86 (s, 2H). **13C NMR** (151 MHz, CDCl3) δ 154.37, 144.85, 139.48, 130.32, 129.08, 128.79, 128.71, 128.63, 127.13, 124.98, 96.14. **IR** (ATR): 3320 (br), 2923, 1594, 1557, 1500, 1383, 760, 693 cm-1. **HRMS** calculated for C15H13N3 [M+Na]+ 258.1007, found 258.1000.

**3-Cyclopropyl-1-phenyl-5-(trifluoromethyl)-1*H*-pyrazole (3w)**

The title compound was synthesized according to general procedure A with **L2** and isolated by preparatory TLC (90:10 hexanes:EtOAc) as white solid [11.0 mg, 87% yield, >20:1 N⍺:Nβ]. **1H NMR** (600 MHz, CDCl3) δ 7.52 – 7.37 (m, 5H), 6.47 (s, 1H), 2.00 (dddd, J = 8.5, 6.6, 4.2, 2.5 Hz, 1H), 0.99 (tdd, J = 6.1, 4.3, 1.5 Hz, 2H), 0.87 – 0.78 (m, 2H). **13C NMR** (151 MHz, CDCl3) δ 155.60, 139.33, 133.06 (q, J = 39.0 Hz), 129.16, 129.11, 125.76, 119.91 (q, J = 269.0 Hz), 105.65 (q, J = 2.5 Hz), 9.05, 8.35. **IR** (ATR): 2927, 1597, 1483, 1387, 1240, 1169, 1125, 1104, 973, 765, 686 cm-1. The NMR data matches literature report.57

**Methyl 5-ethyl-1-phenyl-1*H*-pyrazole-3-carboxylate (3x)**

The title compound was synthesized according to general procedure A with **L2** and isolated by preparatory TLC (85:25 hexanes:EtOAc) as yellow oil [9.2 mg, 80% yield, 9:1 N⍺:Nβ]. **1H NMR** (400 MHz, CDCl3) δ 7.49 – 7.37 (m, 5H), 6.84 (s, 1H), 3.78 (s, 3H), 2.74 (qd, J = 7.6, 0.5 Hz, 2H), 1.30 (t, J = 7.6 Hz, 3H).**13C NMR** (151 MHz, CDCl3) δ 159.86 (s), 155.05 (s), 140.37 (s), 133.47 (s), 128.70 (s), 128.59 (s), 126.09 (s), 110.88 (s), 52.07 (s), 21.41 (s), 13.81 (s). **IR** (ATR): 3065, 2969, 1731, 1503, 1444, 1283, 1227, 1105, 761, 692 cm-1. **HRMS** calculated for C13H14N2O2Na [M+Na]+253.0953, found 253.0947.

**Methyl 4-bromo-1-phenyl-1*H*-pyrazole-3-carboxylate (3y)**

The title compound was synthesized according to general procedure A with **L1** and isolated by preparatory TLC (90:10 hexanes:EtOAc) as yellow solid [5.5 mg, 39% yield, <1:20 N⍺:Nβ]. **1H NMR** (400 MHz, CDCl3) δ 8.00 (s, 1H), 7.70 – 7.68 (m, 2H), 7.50 – 7.46 (m, 2H), 7.40 – 7.37 (m, 1H), 3.98 (s, 3H). **13C NMR** (151 MHz, CDCl3) δ 161.59, 141.73, 139.18, 130.06, 129.80, 128.43, 120.11, 98.47, 52.43. **IR** (ATR): 3124, 2924, 1720, 1498, 1388, 1370, 1227, 1051, 957, 810, 746, 682, 649, 619 cm-1. **HRMS** calculated for C11H9BrN2O2 [M+Na]+ 302.9745, found 302.9738.

**Ethyl 5-cyclopropyl-1-phenyl-1*H*-pyrazole-4-carboxylate (3z)**

The title compound was synthesized according to general procedure A with **L1** and isolated by preparatory TLC (85:25 hexanes:EtOAc) as yellow oil [12.2 mg, 95% yield, >20:1 N⍺:Nβ]. **1H NMR** (400 MHz, CDCl3) δ 8.01 (s, 1H), 7.53 – 7.46 (m, 4H), 7.44 – 7.40 (m, 1H), 4.32 (q, J = 7.1 Hz, 2H), 1.97 (tt, J = 8.6, 5.5 Hz, 1H), 1.38 (t, J = 7.1 Hz, 3H), 0.95 – 0.88 (m, 2H), 0.68 – 0.62 (m, 2H). **13C NMR** (151 MHz, CDCl3) δ 163.35 (s), 147.48 (s), 142.34 (s), 139.62 (s), 129.07 (s), 128.49 (s), 125.58 (s, J = 3.8 Hz), 114.22 (s), 60.17 (s), 14.57 (s), 8.58 (s), 7.51 (s). **IR** (ATR): 3124, 2923, 1719, 1597, 1498, 1226, 1051, 958, 832, 746, 682, 650 cm-1. **HRMS** calculated for C15H16N2O2 [M+H]+ 257.1290, found 257.1281.

**1-Phenyl-1*H*-indazole (3aa)**

The title compound was synthesized according to general procedure A with dcypm ligand and isolated by preparatory TLC (90:10 hexanes:EtOAc) as yellow solid [6.4 mg, 66% yield, 15:1 N⍺:Nβ]. **1H NMR** (600 MHz, CDCl3) δ 8.21 (d, J = 1.0 Hz, 1H), 7.81 (dt, J = 8.1, 1.0 Hz, 1H), 7.77 (dt, J = 8.6, 0.9 Hz, 1H), 7.75 – 7.73 (m, 2H), 7.57 – 7.53 (m, 2H), 7.44 (ddd, J = 8.3, 6.9, 1.1 Hz, 1H), 7.39 – 7.35 (m, 1H), 7.24 (ddd, J = 8.0, 6.9, 0.8 Hz, 1H).**13C NMR** (151 MHz, CDCl3) δ 140.35, 138.90, 135.54, 129.60, 127.29, 126.79, 125.47, 122.90, 121.66, 121.48, 110.57. The NMR data matches literature report.58

**1,5-Diphenyl-1*H*-1,2,4-triazole (3ab)**

The title compound was synthesized according to general procedure A with **L2** and isolated by preparatory TLC (80:20 hexanes:EtOAc) as white solid [9 mg, 80% yield, 7:1 N⍺:Nβ]. **1H NMR** (600 MHz, CDCl3) δ 8.10 (s, 1H), 7.51 – 7.47 (m, 2H), 7.44 – 7.38 (m, 4H), 7.38 – 7.32 (m, 4H). **13C NMR** (151 MHz, CDCl3) δ 154.23, 151.92, 138.52, 130.40, 129.76, 129.29, 129.23, 128.93, 128.10, 125.72. The NMR data matches literature report.59

**4-Bromo-2-phenyl-2*H*-1,2,3-triazole (3ac)**

The title compound was synthesized according to general procedure A with **L1** and isolated by preparatory TLC (90:10 hexanes:EtOAc) as colorless solid [6.2 mg, 55% yield, 3:1 N⍺:Nβ]. **1H NMR** (600 MHz, CDCl3) δ 8.05 – 8.01 (m, 2H), 7.76 (s, 1H), 7.49 (dd, J = 8.6, 7.4 Hz, 2H), 7.37 (t, J = 7.4 Hz, 1H). **13C NMR** (151 MHz, CDCl3) δ 139.58, 136.91, 129.52, 128.16, 124.12, 118.76. **IR** (ATR): 2924, 1597, 1496, 1445, 1371, 1130, 990, 959, 835, 753, 698, 688, 662 cm-1. **HRMS** calculated for C8H6BrN3 [M+H]+222.9745, found 218.9856.

**1,3-Diphenyl-1*H*-pyrazole (4a)**

The title compound was synthesized according to general procedure B and isolated by preparatory TLC (90:10 hexanes:EtOAc) as yellow oil [10 mg, 90% yield, <1:20 N⍺:Nβ]. **1H NMR** (600 MHz, CDCl3) δ 7.96 (d, *J* = 2.5 Hz, 1H), 7.95 – 7.91 (m, 2H), 7.80 – 7.76 (m, 2H), 7.50 – 7.42 (m, 4H), 7.37 – 7.33 (m, 1H), 7.31 – 7.28 (m, 1H), 6.78 (d, *J* = 2.5 Hz, 1H). 13C NMR (151 MHz, CDCl3) δ 153.28, 140.58, 133.47, 129.77, 129.00, 128.38, 128.34, 126.69, 126.19, 119.41, 105.38. The NMR data matches literature report.51

**3-Methyl-1-phenyl-1*H*-pyrazole (4b)**

The title compound was synthesized according to general procedure B and isolated by preparatory TLC (90:10 hexanes:EtOAc) as colorless oil [11.6 mg, 73% yield, 1:9 N⍺:Nβ]. **1H NMR** (400 MHz, CDCl3) δ 7.81 (s, 1H), 7.65 (d, J = 7.7 Hz, 2H), 7.43 (t, J = 7.8 Hz, 2H), 7.25 (t, J = 7.4 Hz, 1H), 6.25 (s, 1H), 2.39 (s, 3H). **13C NMR** (151 MHz, CDCl3) δ 150.65, 140.17, 129.53, 127.68, 126.23, 119.08, 107.71, 13.80. The NMR data matches literature report.51

**3-Cyclopropyl-1-phenyl-1*H*-pyrazole (4c)**

The title compound was synthesized according to general procedure B and isolated by preparatory TLC (90:10 hexanes:EtOAc) as yellow oil [14 mg, 75% yield, 1:12 N⍺:Nβ].**1H NMR** (500 MHz, CDCl3) δ 7.78 (d, J = 2.5 Hz, 1H), 7.65 (d, J = 8.7 Hz, 2H), 7.42 (dd, J = 8.6, 7.4 Hz, 2H), 7.24 (tt, J = 7.4, 1.1 Hz, 1H), 6.11 (d, J = 2.5 Hz, 1H), 2.07 (tt, J = 8.4, 5.0 Hz, 1H), 1.05 – 0.95 (m, 2H), 0.85 – 0.78 (m, 2H). **13C NMR** (125 MHz, CDCl3) δ 157.18, 140.12, 129.49, 127.55, 126.14, 119.04, 104.14, 9.38, 8.35. The NMR data matches literature report.60

**3-Isopropyl-1-phenyl-1*H*-pyrazole (4d)**

The title compound was synthesized according to general procedure B and isolated by preparatory TLC (90:10 hexanes:EtOAc) as yellow oil [16.5 mg, 89% yield, <1:20 N⍺:Nβ]. **1H NMR** (400 MHz, CDCl3) δ 7.81 (dd, J = 2.5, 0.5 Hz, 1H), 7.68 – 7.63 (m, 2H), 7.49 – 7.38 (m, 2H), 7.26 – 7.21 (m, 1H), 6.29 (dd, J = 2.4, 0.5 Hz, 1H), 3.10 (hept, J = 6.9 Hz, 1H), 1.33 (d, J = 7.0 Hz, 6H). **13C NMR** (151 MHz, CDCl3) δ 161.17, 140.37, 129.47, 127.37, 126.10, 119.19, 104.59, 28.12, 22.96. **IR** (ATR): 3049, 2962, 1601, 1529, 1502, 1302, 1042, 751, 689 cm-1. The NMR data matches literature report.61

**3-(Tert-butyl)-1-phenyl-1*H*-pyrazole (4e)**

The title compound was synthesized according to general procedure B and isolated by preparatory TLC (90:10 hexanes:EtOAc) as colorless oil [19 mg, 95% yield, <1:20 N⍺:Nβ]. **1H NMR** (600 MHz, CDCl3) δ 7.80 (d, J = 2.4 Hz, 1H), 7.68 (d, J = 7.1 Hz, 2H), 7.42 (t, J = 7.9 Hz, 2H), 7.23 (t, J = 7.5 Hz, 1H), 6.32 (d, J = 2.4 Hz, 1H), 1.38 (s, 9H).**13C NMR** (151 MHz, CDCl3) δ 163.82, 140.63, 129.43, 126.95, 125.87, 119.06, 104.31, 32.47, 30.65. The NMR data matches literature report.62

**1-Phenyl-3-(o-tolyl)-1*H*-pyrazole (4f)**

The title compound was synthesized according to general procedure B and isolated by preparatory TLC (90:10 hexanes:EtOAc) as white solid [16 mg, 70% yield, <1:20 N⍺:Nβ]. **1H NMR** (600 MHz, CDCl3) δ 7.99 (d, J = 2.4 Hz, 1H), 7.78 (dd, J = 8.6, 1.4 Hz, 2H), 7.67 (dd, J = 5.3, 3.6 Hz, 1H), 7.47 (dd, J = 8.6, 7.4 Hz, 2H), 7.31 – 7.27 (m, 4H), 6.65 (d, J = 2.4 Hz, 1H), 2.58 (s, 3H). **13C NMR** (151 MHz, CDCl3) δ 153.48, 140.29, 136.36, 132.92, 131.05, 129.53, 129.40, 128.04, 127.07, 126.34, 125.97, 119.00, 108.11, 21.57. The NMR data matches literature report.63

**3-(2-Fluorophenyl)-1-phenyl-1*H*-pyrazole (4g)**

The title compound was synthesized according to general procedure B and isolated by preparatory TLC (90:10 hexanes:EtOAc) as colorless oil [16 mg, 69% yield, <1:20 N⍺:Nβ]. **1H NMR** (600 MHz, CDCl3) δ 8.18 (td, J = 7.8, 1.9 Hz, 1H), 7.99 (d, J = 2.5 Hz, 1H), 7.78 (dd, J = 8.6, 1.2 Hz, 2H), 7.48 (dd, J = 8.6, 7.4 Hz, 2H), 7.31 (t, J = 7.5 Hz, 2H), 7.23 (td, J = 7.5, 1.2 Hz, 1H), 7.16 (ddd, J = 11.3, 8.2, 1.2 Hz, 1H), 6.94 (dd, J = 4.0, 2.5 Hz, 1H). **13C NMR** (151 MHz, CDCl3) δ 160.44 (d, J = 249.5 Hz), 147.71, 140.20, 129.57, 129.46 (d, J = 8.4 Hz), 128.66 (d, J = 3.7 Hz), 127.87 (d, J = 2.5 Hz), 126.65, 124.42 (d, J = 3.3 Hz), 121.07 (d, J = 11.7 Hz), 119.28, 116.20 (d, J = 22.2 Hz), 108.64 (d, J = 10.5 Hz). **19F NMR** (565 MHz, CDCl3) δ -115.88. The NMR data matches literature report.63

**3-(2-Bromophenyl)-1-phenyl-1*H*-pyrazole (4h)**

The title compound was synthesized according to general procedure B and isolated by preparatory TLC (90:10 hexanes:EtOAc) as colorless oil [21 mg, 69% yield, <1:20 N⍺:Nβ]. **1H NMR** (600 MHz, CDCl3) δ 7.99 (d, J = 2.5 Hz, 1H), 7.82 (dd, J = 7.7, 1.8 Hz, 1H), 7.77 (d, J = 8.5 Hz, 2H), 7.68 (dd, J = 8.1, 1.3 Hz, 1H), 7.47 (dd, J = 8.5, 7.4 Hz, 2H), 7.39 (td, J = 7.5, 1.2 Hz, 1H), 7.30 (t, J = 7.5 Hz, 1H), 7.22 (td, J = 7.7, 1.8 Hz, 1H), 6.97 (d, J = 2.5 Hz, 1H). **13C NMR** (151 MHz, CDCl3) δ 152.23, 140.17, 134.32, 133.69, 131.42, 129.58, 129.49, 127.59, 127.13, 126.66, 122.26, 119.30, 109.07. I**R** (ATR): 2922, 1599, 1521, 1445, 1024, 956, 749, 686 cm-1. **HRMS** calculated for C15H11BrN2 [M+H]+ 299.0184, found 299.0171.

**3-(2-Methoxyphenyl)-1-phenyl-1*H*-pyrazole (4i)**

The title compound was synthesized according to general procedure B and isolated by preparatory TLC (90:10 hexanes:EtOAc) as colorless oil [20 mg, 81% yield, 1:12 N⍺:Nβ]. **1H NMR** (600 MHz, CDCl3) δ 8.11 (dd, J = 7.7, 1.8 Hz, 1H), 7.96 (d, J = 2.5 Hz, 1H), 7.79 (d, J = 8.7 Hz, 2H), 7.46 (t, J = 7.9 Hz, 2H), 7.33 (ddd, J = 8.7, 7.4, 1.8 Hz, 1H), 7.28 (t, J = 7.5 Hz, 1H), 7.06 (dd, J = 8.0, 6.9 Hz, 1H), 7.02 (d, J = 2.4 Hz, 1H), 7.01 (d, J = 8.3 Hz, 1H), 3.94 (s, 3H).**13C NMR** (151 MHz, CDCl3) δ 157.15, 150.12, 140.45, 129.50, 129.24, 129.03, 127.15, 126.29, 122.21, 121.03, 119.21, 111.46, 109.31, 55.65. The NMR data matches literature report.60

**1-Phenyl-3-(p-tolyl)-1*H*-pyrazole (4j)**

The title compound was synthesized according to general procedure B and isolated by preparatory TLC (90:10 hexanes:EtOAc) as white solid [22.1 mg, 94% yield, <1:20 N⍺:Nβ]. **1H NMR** (500 MHz, CDCl3) 1H NMR (499 MHz, CDCl3) δ 7.94 (d, J = 2.4 Hz, 1H), 7.86 – 7.80 (m, 2H), 7.79 – 7.75 (m, 2H), 7.50 – 7.43 (m, 2H), 7.34 – 7.27 (m, 1H), 7.27 – 7.22 (m, 2H), 6.75 (d, J = 2.4 Hz, 1H), 2.40 (s, 3H). **13C NMR** (151 MHz, CDCl3) δ 153.08, 140.31, 137.97, 130.35, 129.52, 129.47, 128.06, 126.36, 125.84, 119.13, 104.98, 21.46. **IR** (ATR): 3058, 2918, 1597, 1509, 1446, 1263, 1119, 1043, 953, 938, 823, 755, 690 cm-1. **HRMS** calculated for C16H14N2 [M+H]+ 235.1235, found 235.1239. The NMR data matches literature report.63

**3-(4-Chlorophenyl)-1-phenyl-1*H*-pyrazole (4k)**

The title compound was synthesized according to general procedure B and isolated by preparatory TLC (90:10 hexanes:EtOAc) as white solid [8.0 mg, 31% yield, <1:20 N⍺:Nβ]. **1H NMR** (400 MHz, CDCl3) δ 7.96 (d, J = 2.6 Hz, 1H), 7.89 – 7.83 (m, 2H), 7.79 – 7.73 (m, 2H), 7.53 – 7.45 (m, 2H), 7.42 – 7.37 (m, 2H), 7.31 (ddt, J = 8.6, 7.0, 1.2 Hz, 1H), 6.75 (d, J = 2.5 Hz, 1H). **13C NMR** (151 MHz, CDCl3) δ 151.94, 140.21, 133.91, 131.74, 129.61, 128.97, 128.36, 127.23, 126.69, 119.26, 105.12. **IR** (ATR): 3058, 1598, 1505, 1441, 1087, 1044, 1012, 953, 939, 827, 754, 690 cm-1. **HRMS** calculated for C15H11ClN2 [M+H]+255.0689, found 255.0678. The NMR data matches literature report.63

**3-(4-Fluorophenyl)-1-phenyl-1*H*-pyrazole (4l)**

The title compound was synthesized according to general procedure B and isolated by preparatory TLC (90:10 hexanes:EtOAc) as white solid [11.9 mg, 50% yield, <1:20 N⍺:Nβ]. **1H NMR** (400 MHz, CDCl3) δ 7.95 (d, J = 2.5 Hz, 1H), 7.92 – 7.86 (m, 2H), 7.79 – 7.74 (m, 2H), 7.50 – 7.44 (m, 2H), 7.33 – 7.27 (m, 1H), 7.16 – 7.08 (m, 2H), 6.73 (d, J = 2.5 Hz, 1H). **13C NMR** (151 MHz, CDCl3) δ 162.92 (d, J = 247.3 Hz), 152.16, 140.23, 129.59, 129.43 (d, J = 3.02 Hz), 128.30, 127.68 (d, J = 8.3 Hz), 126.60, 119.22, 115.71 (d, J = 21.6 Hz), 104.96. **19F NMR** (376 MHz, CDCl3) δ -114.35. **IR** (ATR): 3059, 2923, 1597, 1506, 1446, 1221, 1155, 1043, 840, 751, 693, 605 cm-1. **HRMS** calculated for C15H12FN2 [M+H]+ 239.0984, found 239.0993. The NMR data matches literature report.60

**3-(4-Methoxyphenyl)-1-phenyl-1*H*-pyrazole (4m)**

The title compound was synthesized according to general procedure B and isolated by preparatory TLC (90:10 hexanes:EtOAc) as white solid [20 mg, 80% yield, 1:17 N⍺:Nβ]. **1H NMR** (600 MHz, CDCl3) δ 7.93 (d, J = 2.4 Hz, 1H), 7.87 – 7.85 (m, 2H), 7.77 (dq, J = 7.8, 1.1 Hz, 2H), 7.50 – 7.43 (m, 2H), 7.28 (t, J = 7.4 Hz, 1H), 6.98 (d, J = 8.9 Hz, 2H), 6.71 (d, J = 2.5 Hz, 1H), 3.86 (s, 3H). **13C NMR** (151 MHz, CDCl3) δ 159.74, 152.90, 140.36, 129.52, 128.04, 127.24, 126.29, 126.03, 119.07, 114.18, 104.71, 55.44. The NMR data matches literature report.60

**3-(3-Methoxyphenyl)-1-phenyl-1*H*-pyrazole (4n)**

The title compound was synthesized according to general procedure B and isolated by preparatory TLC (90:10 hexanes:EtOAc) as white solid [22 mg, 88% yield, <1:20 N⍺:Nβ]. **1H NMR** (600 MHz, CDCl3) δ 7.96 (d, J = 2.5 Hz, 1H), 7.81 – 7.75 (m, 2H), 7.53 – 7.45 (m, 4H), 7.35 (t, J = 7.9 Hz, 1H), 7.30 (tt, J = 7.4, 1.2 Hz, 1H), 6.91 (ddd, J = 8.3, 2.6, 1.0 Hz, 1H), 6.77 (d, J = 2.5 Hz, 1H), 3.90 (s, 3H).**13C NMR** (151 MHz, CDCl3) δ 160.06, 152.92, 140.33, 134.62, 129.80, 129.55, 128.12, 126.50, 118.97, 118.57, 114.12, 111.10, 105.33, 55.45. The NMR data matches literature report.60

**3-(Furan-2-yl)-1-phenyl-1*H*-pyrazole (4o)**The title compound was synthesized according to general procedure B with [Cu(CH3CN)4]PF6 (3.8 mg, 0.01 mmol, 10 mol%). It was isolated by preparatory TLC (80:20 hexanes:EtOAc) as yellow oil [17.1 mg, 81% yield, 1:13 N⍺:Nβ]. **1H NMR** (400 MHz, CDCl3) δ 7.92 (d, J = 2.5 Hz, 1H), 7.77 – 7.71 (m, 2H), 7.50 (dd, J = 1.8, 0.8 Hz, 1H), 7.49 – 7.42 (m, 2H), 7.33 – 7.27 (m, 1H), 6.78 (dd, J = 3.4, 0.8 Hz, 1H), 6.70 (d, J = 2.5 Hz, 1H), 6.50 (ddd, J = 3.3, 1.8, 0.5 Hz, 1H). **13C NMR** (151 MHz, CDCl3) δ 148.62, 145.56, 142.31, 140.06, 129.56, 128.06, 126.73, 119.45, 111.54, 106.70, 105.10. The NMR data matches literature report.60

**5-Methyl-1,3-diphenyl-1*H*-pyrazole (4p)**

The title compound was synthesized according to general procedure B and isolated by preparatory TLC (90:10 hexanes:EtOAc) as yellow oil [18 mg, 76% yield, 1:8 N⍺:Nβ].  **1H NMR** (400 MHz, CDCl3) δ 7.89 – 7.85 (m, 2H), 7.58 – 7.46 (m, 4H), 7.44 – 7.36 (m, 3H), 7.35 – 7.28 (m, 1H), 6.53 (s, 1H), 2.39 (s, 3H). **13C NMR** (151 MHz, CDCl3) δ 151.61, 140.36, 139.98, 133.38, 129.23, 128.70, 127.93, 127.80, 125.88, 125.16, 104.51, 12.70. The NMR data matches literature report.51

**3-(Tert-butyl)-5-methyl-1-phenyl-1*H*-pyrazole (4q)**

The title compound was synthesized according to general procedure B and isolated by preparatory TLC (90:10 hexanes:EtOAc) as yellow oil [21 mg, 98% yield, <1:20 N⍺:Nβ]. **1H NMR** (600 MHz, CDCl3) δ 7.46 (d, J = 4.3 Hz, 4H), 7.38 – 7.34 (m, 1H), 6.10 (d, J = 0.8 Hz, 1H), 2.31 (s, 3H), 1.37 (s, 9H). **13C NMR** (151 MHz, CDCl3) δ 162.17, 140.03, 139.17, 129.13, 127.37, 125.09, 103.82, 32.21, 30.65, 12.64. The NMR data matches literature report.31

**1,3-Diphenyl-1*H*-pyrazol-5-amine (4r)**

The title compound was synthesized according to general procedure B and isolated by preparatory TLC (80:20 hexanes:EtOAc) as white solid [13 mg, 55% yield, 1:12 N⍺:Nβ]. **1H NMR** (600 MHz, CDCl3) δ 7.82 (d, J = 6.9 Hz, 0H), 7.64 (d, J = 7.3 Hz, 0H), 7.50 (t, J = 7.9 Hz, 1H), 7.44 – 7.35 (m, 2H), 7.31 (t, J = 7.3 Hz, 0H), 5.97 (s, 1H), 3.86 (s, 1H). **13C NMR** (151 MHz, CDCl3) δ 151.65, 145.91, 138.78, 133.59, 129.65, 128.61, 127.95, 127.60, 125.76, 124.29, 88.27. The NMR data matches literature report.14

**Ethyl 3-cyclopropyl-1-phenyl-1*H*-pyrazole-4-carboxylate (4s)**

The title compound was synthesized according to general procedure B and isolated by preparatory TLC (75:25 hexanes:EtOAc) as white solid [21.5 mg, 84% yield, <1:20 N⍺:Nβ]. **1H NMR** (400 MHz, CDCl3) δ 8.30 (s, 1H), 7.69 – 7.60 (m, 2H), 7.50 – 7.39 (m, 2H), 7.29 (ddt, J = 8.0, 7.0, 1.2 Hz, 1H), 4.35 (q, J = 7.1 Hz, 2H), 2.59 (ddt, J = 8.4, 7.5, 5.1 Hz, 1H), 1.38 (t, J = 7.1 Hz, 3H), 1.08 – 0.97 (m, 4H). **13C NMR** (151 MHz, CDCl3) δ 163.85, 157.63, 139.54, 131.08, 129.58, 127.11, 119.39, 114.58, 60.22, 14.59, 8.98, 8.26. **IR** (ATR): 3133, 2974, 1469, 1541, 1263, 1249, 1189, 1069, 772, 750, 684 cm-1. **HRMS** calculated for C15H16N2O2 [M+H]+ 257.1290, found 257.1280.

**2-Phenyl-2*H*-indazole (4t)**

The title compound was synthesized according to general procedure B and isolated by preparatory TLC (90:10 hexanes:EtOAc) as yellow solid [7.8 mg, 40% yield, 1:10 N⍺:Nβ]. **1H NMR** (600 MHz, CDCl3) δ 8.42 (d, J = 1.0 Hz, 1H), 7.91 (dd, J = 8.6, 1.2 Hz, 2H), 7.80 (dd, J = 8.8, 1.0 Hz, 1H), 7.72 (d, J = 8.4 Hz, 1H), 7.53 (dd, J = 8.6, 7.3 Hz, 2H), 7.44 – 7.39 (m, 1H), 7.33 (ddd, J = 8.8, 6.6, 1.1 Hz, 1H), 7.12 (ddd, J = 8.4, 6.6, 0.9 Hz, 1H).**13C NMR** (151 MHz, CDCl3) δ 149.95, 140.70, 133.59, 129.73, 128.07, 126.99, 122.62, 121.18, 120.58, 120.53, 118.10. The NMR data matches literature report.64

**1-(3,4-Dimethylphenyl)-5-phenyl-1*H*-pyrazole (5a)**

The title compound was synthesized according to general procedure A with **L2** and isolated by preparatory TLC (90:10 hexanes:EtOAc) as white solid [9.4 mg, 76% yield, 16:1 N⍺:Nβ]. **1H NMR** (500 MHz, CDCl3) δ 7.75 (d, J = 1.9 Hz, 1H), 7.33 – 7.29 (m, 3H), 7.26 – 7.23 (m, 2H), 7.20 (d, J = 2.3 Hz, 1H), 7.05 (d, J = 8.0 Hz, 1H), 6.92 (dd, J = 8.1, 2.3 Hz, 1H), 6.52 (d, J = 1.9 Hz, 1H), 2.26 (s, 3H), 2.23 (s, 3H). **13C NMR** (151 MHz, CDCl3) δ 143.44, 139.37, 137.79, 137.20, 136.65, 130.30, 130.03, 128.87, 128.59, 128.53, 126.43, 122.76, 107.61, 19.88, 19.59. **IR** (ATR): 3096, 3030, 2920, 2854, 1505, 1449, 1375, 971, 876, 786, 757, 699 cm-1. **HRMS** calculated for C17H16N2 [M+H]+ 249.1392, found 249.1390.

**1-(3,4-Dimethoxyphenyl)-5-phenyl-1*H*-pyrazole (5b)**

The title compound was synthesized according to general procedure A with **L3** and isolated by preparatory TLC (70:30 hexanes:EtOAc) as brown solid [11.4 mg, 81% yield, 12:1 N⍺:Nβ]. **1H NMR** (499 MHz, CDCl3) δ 7.70 (d, J = 1.8 Hz, 1H), 7.32 – 7.28 (m, 3H), 7.26 – 7.21 (m, 2H), 6.87 (d, J = 2.1 Hz, 1H), 6.79 (d, J = 2.1 Hz, 1H), 6.78 (s, 1H), 6.50 (d, J = 1.8 Hz, 1H), 3.88 (s, 3H), 3.73 (s, 3H). **13C NMR** (151 MHz, CDCl3) δ 149.03, 148.40, 143.10, 140.10, 133.52, 130.83, 128.88, 128.55, 128.25, 117.59, 110.81, 109.22, 107.54, 56.14, 56.01. **IR** (ATR): 3184, 2924, 1599, 1518, 1247, 1224, 1176, 1125, 1022, 858, 791, 761, 702 cm-1. **HRMS** calculated for C17H16N2O2 [M+H]+ 281.1290, found 281.1277.

**1-(Naphthalen-2-yl)-5-phenyl-1*H*-pyrazole (5c)**

The title compound was synthesized according to general procedure A with **L3** and isolated by preparatory TLC (70:30 hexanes:EtOAc) as yellow solid [7.5mg, 50% yield, 11:1 N⍺:Nβ]. **1H NMR** (500 MHz, CDCl3) δ 7.85 – 7.83 (m, 2H), 7.79 – 7.74 (m, 3H), 7.51 – 7.47 (m, 2H), 7.38 (dd, J = 8.7, 2.1 Hz, 1H), 7.30 – 7.27 (m, 5H), 6.56 (d, J = 1.7 Hz, 1H). **13C NMR** (151 MHz, CDCl3) δ 143.31, 140.66, 137.77, 133.38, 132.34, 130.75, 128.94, 128.84, 128.65, 128.40, 128.29, 127.87, 126.81, 126.54, 123.70, 123.44, 108.15. **IR** (ATR): 3057, 2922, 1598, 1509, 1128, 926, 868, 830, 763, 753, 695 cm-1. **HRMS** calculated for C19H14N2 [M+Na]+293.1055, found 293.1050.

**5-Phenyl-1-(p-tolyl)-1*H*-pyrazole (5d)**

The title compounds was synthesized according to general procedure A with **L2** and isolated by preparatory TLC (90:10 hexanes:EtOAc) as white solid [11 mg, 98% yield, >20:1 N⍺:Nβ, 1:1 C1:C2].

**1H NMR** (600 MHz, CDCl3) δ 7.71 (d, J = 1.8 Hz, 1H), 7.31 – 7.28 (m, 3H), 7.27 – 7.21 (m, 2H), 7.17 (t, J = 7.7 Hz, 1H), 7.11 (d, J = 7.7 Hz, 1H), 6.98 (dd, J = 8.1, 1.9 Hz, 1H), 6.50 (d, J = 1.9 Hz, 1H), 2.33 (s, 3H).**13C NMR** (151 MHz, CDCl3) δ 143.08, 140.30, 139.20, 130.82, 128.87, 128.65, 128.53, 128.32, 125.95, 122.45, 107.83, 21.43. The NMR data matches literature report.66

**1H NMR** (600 MHz, CDCl3) δ 7.70 (d, J = 1.8 Hz, 1H), 7.31 – 7.30 (m, 3H), 7.25 – 7.23 (m, 2H), 7.18 (d, J = 8.3 Hz, 2H), 7.12 (d, J = 8.1 Hz, 2H), 6.50 (d, J = 1.8 Hz, 1H), 2.36 (s, 3H). The NMR data matches literature report.66

**1-(4-(Methylsulfonyl)phenyl)-5-phenyl-1*H*-pyrazole (5e)**

The title compound was synthesized according to general procedure C with **L2** and isolated by preparatory TLC (90:10 hexanes:EtOAc) as yellow oil [5.1 mg, 34% yield, 7:1 N⍺:Nβ, 2:1 C1:C2]. 1H NMR (600 MHz, CDCl3) δ 7.72 (d, J = 1.7 Hz, 1H), 7.36 – 7.28 (m, 5H), 7.28 – 7.20 (m, 4H), 6.51 (d, J = 1.6 Hz, 1H). IR (ATR): 2923, 1594, 1496, 1382, 1093, 959, 923, 830, 759, 696 cm-1. The NMR data matches literature report.66

**5-Phenyl-1-(m-tolyl)-1*H*-pyrazole (5f)**

The title compound was synthesized according to general procedure A with **L3** and isolated by preparatory TLC (90:10 hexanes:EtOAc) as white oil [9.8 mg, 84% yield, >20:1 N⍺:Nβ, 1:5 C1:C2]. **1H NMR** (499 MHz, CDCl3) δ 7.73 (d, J = 1.9 Hz, 1H), 7.32– 7.26 (m, 1H), 7.26 – 7.21 (m, 6H), 7.18 – 7.15 (m, 2H), 6.56 (d, J = 1.9 Hz, 1H), 1.96 (s, 3H). **13C NMR** (151 MHz, CDCl3) δ 144.18, 140.20, 139.68, 135.75, 131.12, 130.42, 129.05, 128.54, 128.22, 128.13, 127.99, 126.71, 106.05, 17.67. **IR** (ATR): 3057, 2922, 1498, 1384, 1067, 960, 925, 757, 693 cm-1. **HRMS** calculated for C16H14N2 [M+H]+ 235.1235, found 235.1244. The NMR data matches literature report.65

**5-Phenyl-1-(2-(trimethylsilyl)phenyl)-1*H*-pyrazole (5g)**

The title compound was synthesized according to general procedure A with **L1** and isolated by preparatory TLC (90:10 hexanes:EtOAc) as colorless oil [7.2 mg, 49% yield, >20:1 N⍺:Nβ, >20:1 C1:C2]. **1H NMR** (600 MHz, CD3CN) δ 7.75 (d, J = 7.5 Hz, 1H), 7.65 (t, J = 1.6 Hz, 1H), 7.43 (t, J = 7.4 Hz, 1H), 7.30 (tt, J = 7.7, 1.5 Hz, 1H), 7.28 – 7.23 (m, 3H), 7.20 – 7.16 (m, 2H), 6.89 (d, J = 7.8 Hz, 1H), 6.63 (t, J = 1.6 Hz, 1H), 0.04 (s, 9H).**13C NMR** (151 MHz, CD3CN) δ 146.41, 144.42, 140.10, 139.12, 136.87, 131.23, 130.56, 129.40, 129.25, 129.01, 128.97, 128.66, 107.76, -0.62. **IR** (ATR): 3059, 2951, 1480, 1432, 1245, 1121, 925, 837, 757, 724, 694 cm-1. **HRMS** calculated for C18H20N2Si [M+H]+ 293.1474, found 293.1476.

**1-([1,1'-Biphenyl]-2-yl)-5-phenyl-1*H*-pyrazole (5h)**

The title compound was synthesized according to general procedure A with **L1** and isolated by preparatory TLC (90:10 hexanes:EtOAc) as white solid [6.8 mg, 46% yield, 6:1 N⍺:Nβ, >20:1 C1:C2]. **1H NMR** (600 MHz, CD3CN) δ 7.73 (d, J = 1.9 Hz, 1H), 7.60 (ddd, J = 7.8, 1.8, 1.0 Hz, 1H), 7.47 (t, J = 7.9 Hz, 1H), 7.45 – 7.43 (m, 3H), 7.40 (td, J = 6.6, 1.8 Hz, 2H), 7.38 – 7.29 (m, 7H), 6.60 (d, J = 1.8 Hz, 1H). **13C NMR** (151 MHz, CDCl3) δ 143.23, 142.09, 140.58, 140.53, 140.17, 130.89, 129.39, 129.03, 128.89, 128.69, 128.41, 127.78, 127.22, 126.12, 124.04, 123.88, 108.08. **IR** (ATR): 3057, 2922, 1599, 1483, 1425, 1384, 965, 924, 888, 792, 756, 696 cm-1. **HRMS** calculated for C21H16N2 [M+H]+ 297.1392, found 297.1378.

**1-(3-Nitrophenyl)-5-phenyl-1*H*-pyrazole (5i)**

The title compound was synthesized according to general procedure C with **L1** and isolated by preparatory TLC (70:30 hexanes:EtOAc) as yellow solid [6.2 mg, 47% yield, 2:1 N⍺:Nβ, >20:1 C1:C2]. **1H NMR** (600 MHz, CDCl3) δ 8.24 (t, J = 2.2 Hz, 1H), 8.14 (ddd, J = 8.2, 2.2, 1.0 Hz, 1H), 7.78 (d, J = 1.8 Hz, 1H), 7.59 (ddd, J = 8.1, 2.2, 1.0 Hz, 1H), 7.48 (t, J = 8.1 Hz, 1H), 7.41 – 7.33 (m, 3H), 7.26 – 7.21 (m, 2H), 6.55 (d, J = 1.8 Hz, 1H). **13C NMR** (151 MHz, CDCl3) δ 148.55, 143.59, 141.51, 141.13, 130.43, 130.05, 129.77, 129.08, 129.03, 128.98, 121.90, 119.93, 109.15. **IR** (ATR): 3098, 2922, 1528, 1490, 1440, 1378, 1348, 923, 893, 801, 761, 737, 697, 674, 644 cm-1. **HRMS** calculated for C15H11N3O2 [M+H]+ 266.0930, found 266.0932. The NMR data matches literature report.10

**1-(Naphthalen-1-yl)-5-phenyl-1*H*-pyrazole (5j’)**

The title compounds was synthesized according to general procedure A with **L4** and isolated by preparatory TLC (90:10 hexanes:EtOAc) as white solid [6.4 mg, 47% yield, 14:1 N⍺:Nβ, 6:1 C1:C2]. **1H NMR** (600 MHz, CDCl3) δ 7.91 (d, J = 8.2 Hz, 2H), 7.85 (d, J = 1.5 Hz, 1H), 7.58 (d, J = 8.3 Hz, 1H), 7.51 (t, J = 7.4 Hz, 1H), 7.49 – 7.45 (m, 1H), 7.42 (t, J = 7.7 Hz, 1H), 7.32 (d, J = 7.2 Hz, 1H), 7.19 – 7.09 (m, 5H), 6.66 (d, J = 1.6 Hz, 1H). **13C NMR** (151 MHz, CDCl3) δ 145.29, 140.60, 136.86, 134.42, 130.74, 130.26, 129.38, 128.45, 128.19, 128.17, 128.11, 127.43, 126.73, 125.77, 125.15, 123.52, 106.46. **IR** (ATR): 3054, 2924, 1510, 1408, 1129, 924, 801, 773, 757, 730, 695 cm-1. **HRMS** calculated for C19H14N2 [M+H]+ 271.1235, found 271.1234.

# Synthesis of CDPPB (7) and CDPPB-*N*-isomer (8)

The preparation of 3-cyano-*N*-(5-phenyl-1*H*-pyrazol-3-yl)benzamide (**6**) was performed using literature reported procedure.67

5-Phenyl-1*H*-pyrazol-3-amine (200 mg, 1.26 mmol, 1.00 equiv.) was suspended in dry pyridine/dry THF (12/6 ml) mixture at 0 °C. A solution of 3-cyanobenzoyl chloride (196 μL, 250 mg, 1.51 mmol, 1.20 equiv.) in dry THF (2 mL) was added to this suspension dropwise via a syringe pump (1 mL/h), the suspension was stirred for 1 h at room temperature. The reaction mixture was quenched with H2O. The precipitate was filtered off, washed with H2O (3×) and dried in vacuo. 146 mg pink solid was isolated in 40% yield.

**3-Cyano-*N*-(5-phenyl-1*H*-pyrazol-3-yl)benzamide (6)**

**1H NMR** (600 MHz, DMSO)δ 13.02 (s, 1H), 11.13 (s, 1H), 8.46 (s, 1H), 8.33 – 8.29 (m, 1H), 8.05 (d, *J* = 7.7 Hz, 1H), 7.75 (dd, *J* = 20.7, 7.8 Hz, 3H), 7.46 (t, *J* = 7.6 Hz, 2H), 7.36 (t, *J* = 7.4 Hz, 1H), 7.07 (s, 1H). **13C NMR** (151 MHz, DMSO) δ 162.32, 149.21, 147.61, 141.53, 134.60, 132.13, 131.08, 129.37, 128.88, 128.62, 127.77, 124.59, 117.92, 111.12, 94.23. **IR** (ATR): 3329, 2235, 1662, 1609, 1540, 1507, 1466, 1418, 1296, 1192, 1072, 1027, 953, 756, 739, 693, 676, 620, 587, 580 cm-1. **HRMS** calculated for C17H12N4O [M+Na]+ 311.0909, found 311.0895.

**3-Cyano-*N*-(1,3-diphenyl-1*H*-pyrazol-5-yl)benzamide (7, CDPPB)**

The title compound was synthesized according to general procedure B with **L5** and isolated by preparatory TLC (60:40 hexanes:EtOAc) as white solid [10.2 mg, 56% yield, 1:6 N⍺:Nβ]. **1H NMR** (600 MHz, DMSO) δ 10.75 (s, 1H), 8.31 (s, 1H), 8.18 (d, *J* = 8.0 Hz, 1H), 8.10 (d, *J* = 7.8 Hz, 1H), 7.91 (d, *J* = 7.6 Hz, 2H), 7.76 (t, *J* = 7.8 Hz, 1H), 7.65 (d, *J* = 7.8 Hz, 2H), 7.54 – 7.49 (m, 2H), 7.46 (t, *J* = 7.5 Hz, 2H), 7.38 (dt, *J* = 14.3, 7.4 Hz, 2H), 7.02 (d, *J* = 1.5 Hz, 1H). **13C NMR** (151 MHz, DMSO) δ 164.03, 149.97, 138.45, 136.47, 135.35, 133.90, 132.43, 132.17, 131.10, 129.80, 128.97, 128.50, 127.86, 127.29, 124.91, 123.09, 117.85, 111.49, 101.08. **IR** (ATR): 3252, 2922, 2231, 1648, 1595, 1564, 1519, 1500, 1475, 1456, 1418, 1363, 1303, 1169, 1074, 949, 914, 817, 802, 760, 747, 687, 679, 640 cm-1. **HRMS** calculated for C23H16N4O [M+H]+ 365.1402, found 365.1411. The NMR data matches literature report.38

**3-Cyano-*N*-(1,5-diphenyl-1*H*-pyrazol-3-yl)benzamide (8, CDPPB-*N-*Isomer)**

The title compound was synthesized according to general procedure A with **L2** and isolated by preparatory TLC (60:40 hexanes:EtOAc) as white solid [5.6 mg, 31% yield, 4:1 N⍺:Nβ]. **1H NMR** (600 MHz, DMSO) δ 11.42 (s, 1H), 8.49 (s, 1H), 8.33 (d, *J* = 8.0 Hz, 1H), 8.07 (d, *J* = 7.7 Hz, 1H), 7.75 (t, *J* = 7.8 Hz, 1H), 7.42 (t, *J* = 7.6 Hz, 2H), 7.38 (t, *J* = 3.1 Hz, 4H), 7.29 (d, *J* = 6.8 Hz, 4H), 7.07 (s, 1H). **13C NMR** (151 MHz, DMSO) δ 162.77, 147.70, 142.50, 139.20, 134.91, 134.61, 132.31, 131.32, 129.56, 129.37, 128.84, 128.42, 128.33, 128.19, 127.34, 124.85, 118.02, 111.31, 100.02. **IR** (ATR): 3243, 3067, 2922, 2852, 2232, 1667, 1567, 1495, 1471, 1368, 1280, 1191, 1073, 1016, 971, 913, 806, 762, 738 cm-1. **HRMS** calculated for C23H16N4O [M+Na]+ 387.1222, found 387.1217.

# Synthesis and Reactivity of Cu-pyrazolate

**Preparation of CyXant-Cu-Nα**: In a nitrogen-filled glovebox, an oven-dried 4 mL amber-glass vial was charged with pyrazole (14.4 mg, 0.10 mmol), a stir bar, and a solution of mesitylcopper (18.3 mg, 0.10 mmol) in benzene (400 uL). The mixture was stirred for 10 min, and then a solution of **L1** (60.3 mg, 0.10 mmol) in benzene (600 uL) was added. The resulting reaction mixture was stirred for 6 h, and then pentane (2.0 mL) was added dropwise. This mixture was stirred for 1 h, during which time a white precipitate formed. The white precipitate was filtered, rinsed with pentane (5 mL), and dried to give 45 mg (56% yield) of the desired product as a white powder. X-ray quality crystals were obtained by slow evaporation of solvent from a saturated solution in a mixture of benzene/ether/pentane. 21

**1H NMR** (600 MHz, THF) δ 7.91 (d, *J* = 7.6 Hz, 2H), 7.58 (d, *J* = 7.6 Hz, 2H), 7.51 (d, *J* = 1.6 Hz, 1H), 7.48 – 7.44 (m, 2H), 7.21 (dt, *J* = 20.9, 7.6 Hz, 4H), 6.99 (t, *J* = 7.3 Hz, 1H), 6.42 (d, *J* = 1.7 Hz, 1H), 2.41 (t, *J* = 11.7 Hz, 4H), 2.09 (d, *J* = 11.3 Hz, 4H), 1.69 – 1.52 (m, 17H), 1.30 (dddd, *J* = 53.4, 26.6, 14.4, 7.9 Hz, 18H), 1.09 (ddt, *J* = 18.8, 12.9, 6.4 Hz, 4H). **13C NMR** (151 MHz, THF) δ 138.43, 134.90, 130.92, 127.49, 126.04, 124.60, 123.88, 123.30, 98.70, 33.31, 33.25, 33.19, 29.08, 28.34, 26.97, 26.93, 26.87, 26.83, 26.80, 25.97. **31P NMR** (243 MHz, THF) δ -15.54.

**Stoichiometric reaction of CyXant-Cu-Nα:** In a N2 filled glovebox, to a 1-dram vial equipped with a magnetic stir bar was added **CyXant-Cu-Nα**(40.5 mg, 0.05 mmol, 1.0 equiv.) and acetonitrile (1.0 mL, 0.05 M). After stirring for 30 min, 1,1,3,3-tetramethylguanidine (TMG, 2.9 mg, 0.025 mmol, 0.5 equiv.) was added. The resulting mixture was stirred for another 30 min followed by the addition of 2-(trimethylsilyl)phenyl trifluoromethanesulfonate (**2**)(18.2 μL, 22.4 mg, 0.075 mmol, 1.5 equiv.) and CsF (15.2 mg, 0.1 mmol, 2.0 equiv.). The vial was sealed with a Teflon-lined screw cap and stirred at 30 °C for 12 hours. The mixture was concentrated in vacuo. Regioselectivity (rr) was determined by 1H NMR analysis of the crude mixture (14:1 Nα:Nβ). Isolated yield reported.

# DFT Calculations

## 7.1 General Information

Density functional theory (DFT) was employed to study the regioselectivity-determining aminocupration step in the arylation of substituted pyrazoles via copper-catalysis. Pyrazole **3t** and benzyne precursor **2a** were chosen as the model substrate system for our theoretical study using Cu-Cy-XantPhos (**L1**) as the catalytic species (**condition 1**), while pyrazole **4q** was employed for analysis using Cu-1,10-phenanthroline (**L5**) as the catalytic species (**condition 2**). All ground state and transition state optimizations as well as the calculation of vibrational frequencies were performed at the M062X/6-31G(d) level of theory in gas phase, as implemented in Gaussian 16.45,47,49 Single point energies were computed at the M062X/6-311+G(d,p) level of theory utilizing a polarized continuum solvation model (PCM) for acetonitrile.46,48 Thermal corrections to free energies at 30°C were implemented using Grimme’s quasi-rigid rotor harmonic oscillator (QRRHO) approximation.68 Transition structures (TSs) were verified as exhibiting one sole imaginary frequency, and intrinsic reaction coordinate calculations were performed to confirm the TSs connect the minima along the potential energy surface. Conformational analysis was carried out for all TSs. Molecular graphics were generated using CYLView,69 Multiwfn,70 VMD,71 and ChimeraX.72

## 7.2. Analysis of the Cy-XantPhos (L1)-Controlled Nα-Arylation

Two possible mechanisms of aminocupration were explored for the addition of pyrazole **3t** to benzyne: a 1,2-migratory insertion pathway and a 1’,6’-migratory insertion pathway.18 The latter can be described as a 5-centered aminocupration transition state with copper remaining bound to one nitrogen of pyrazole during arylation of the other nitrogen heteroatom by **2a (Figure S1A)**. Transition states were located for the addition of **2a** to **3t**’s more sterically hindered *Nα* via metallo-tautomer **Cu-Nβ-3t** (**TS-Nα-3t**) as well as the addition of **2a** to its less sterically hindered *Nβ* via metallo-tautomer **Cu-Nα-3t** (**TS-Nβ-3t**). **TS-Nβ-3t**, leading to the minor *Nβ*-regioisomer, was found to be 1.2 kcal/mol higher in energy than **TS-Nα-3t**, leading to the major *Nα*-regioisomer. This is consistent with the experimentally observed >20:1 *Nα*:*Nβ* regioselectivity under **L1** reaction conditions.

Alternatively, the 1,2-migratory insertion pathway—arylation occurring via a 4-centered transition state with the nitrogen involved in the Cu-pyrazolate complex undergoing C-N bond formation with **2a**—was also explored for the addition of both the more sterically hindered *Nα* and the less hindered *Nβ* (**TS-MINα-3t** and **TS-MINβ-3t**, respectively) **(Figure S1B)**. However, both transition states were higher in energy than their respective 1’,6’-migratory insertion counterparts. Overall, **TS-Nα-3t** represents the lowest energy TS for arylation of **3t** with the 1’,6’-migratory insertion pathway being favored over the 1,2-migratory pathway by 3.4-9.5 kcal/mol.

**Figure S1.** TSs for the favored, 5-centered 1’,6’-migratory insertion pathway **(A)** and the disfavored, 4-centered 1,2-migratory insertion pathway **(B)** for the arylation of **3t**. Free energies provided are relative to **TS-Nα-3t**.

The relative energies of the key 5-centered aminocupration TSs (**TS-Nα-3t** and **TS-Nβ-3t**) were validated at two other levels of theory: (1) B3LYP-D3/6-311+G(d,p) PCM(MeCN) // B3LYP-D3/6-31G(d) 73,74 and (2) ωB97XD/def2-TZVP SMD(MeCN) // B97D/def2-SVP 75-79 (**Figure S2**). Despite earlier TSs being located for these two levels of theory compared to those previously discussed, similar geometries are observed. Additionally, arylation at the more sterically hindered *Nα* position (**TS-Nα-3t**) is energetically favored over addition at the less hindered *Nβ* (**TS-Nβ-3t**) unanimously across all three levels of theory explored.

**Figure S2.** Comparison of arylation TSs at either *Nα* or *Nβ* of **3t** across three levels of theory: (*left*) **TS-Nα-3t** and **TS-Nβ-3t** for M062X/6-311+G(d,p) PCM(MeCN) // M062X/6-31G(d), (*center*) **TS-Nα-3tB3LYP** and **TS-Nβ-3tB3LYP** for B3LYP-D3/6-311+G(d,p) PCM(MeCN) // B3LYP-D3/6-31G(d), and (*right*) **TS-Nα-3tB97D** and **TS-Nβ-3tB97D** for ωB97XD/def2-TZVP SMD(MeCN) // B97D/def2-SVP. Free energies provided are relative to the lower energy *Nα*-arylation TS (either **TS-Nα-3t, TS-Nα-3tB3LYP,** or **TS-Nα-3tB97D**).

Using the SEQCROW80,81 bundle for ChimeraX, buried volume analyses were performed on the Cu(**L1**)-**3t** fragment of **TS-Nα-3t** and **TS-Nβ-3t** to gauge the steric environment faced by an incoming **2a** substrate prior to aminocupration. The **Cu-Nβ-3t** fragment of **TS-Nα-3t** has an overall buried volume of 76.5%, notably lower than the 80.6% buried volume **Cu-Nα-3t** occupies in **TS-Nβ-3t.** With the t-butyl group of **3t** protruding into the ligand space of **TS-Nβ-3t**, it is unsurprising that there exists more steric bulk in the catalytic pocket in this orientation than in **TS-Nα-3t** where the t-butyl substituent lies unencumbered outside the pocket. This is further illustrated in the topographic steric maps shown in **Figure S3**. The higher buried volume of 23.2% in the bottom right quadrant of **TS-Nβ-3t** reflects the effect of this t-butyl group especially in comparison to the less crowded 20.9% buried volume bottom right quadrant of **TS-Nα-3t.** As such, steric control is perceived to be responsible for the regioselectivity observed under **L1**.

**Figure S3.** Steric maps depicting the catalytic pocket (Cu-**L1**-**3t**) prior to coordination of aryne **2a.** The orientation of the steric maps follows that of the above CYLviewswith **2a** entering in the upper left quadrant.

## 7.3. Analysis of 1,10-Phenanthroline (L5)-Controlled Nβ-Arylation

1’,6’-migratory insertion transition states were also located for the addition of **2a** to (1) **4q**’s more sterically hindered *Nα* via metallo-tautomer **Cu-Nβ-4q** (**TS-Nα-4q**) and (2) **4q**’s less sterically hindered *Nβ* via metallo-tautomer **Cu-Nα-4q** (**TS-Nβ-4q**). **TS-Nα-4q**, leading to the minor *Nα*-regioisomer, was found to be 1.9 kcal/mol higher in energy than **TS-Nβ-4q**, leading to the minor *Nβ*-regioisomer—consistent with the experimentally observed >1:20 *Nα*:*Nβ* regioselectivity under **L3** reaction conditions. Theoretical preference for the *Nβ*-arylation pathway under **L5** control was validated using two other levels of theory: (1) B3LYP-D3/6-311+G(d,p) PCM(MeCN) // B3LYP-D3/6-31G(d) and (2) ωB97XD/def2-TZVP SMD(MeCN) // B97D/def2-SVP (Figure S4). Of note geometrically is the discrepancy in the key C–N bonding forming distance across **TS-Nα-4q** and **TS-Nβ-4q** (2.19 Å v/s 2.33 Å) that is not present in the analogous TSs located across the other levels of theory—2.36 Å v/s 2.32 Å for **TS-Nα-4qB3LYP** and **TS-Nβ-4qB3LYP**, and 2.57 Å v/s 2.54 Åfor **TS-Nα-4qB97D** and **TS-Nβ-4qB97D**. Regardless, across all levels of theory explored, arylation at the less sterically hindered *Nβ* position of **4q** (**TS-Nβ-4q**) is lower in energy compared to arylation at the more sterically hindered *Nα* position (**TS-Nα-4q**).

**Figure S4.** Comparison of arylation TSs at either *Nα* or *Nβ* of **4q** across three levels of theory: (*left*) **TS-Nα-4q** and **TS-Nβ-4q** for M062X/6-311+G(d,p) PCM(MeCN) // M062X/6-31G(d), (*center*) **TS-Nα-4qB3LYP** and **TS-Nβ-4qB3LYP** for B3LYP-D3/6-311+G(d,p) PCM(MeCN) // B3LYP-D3/6-31G(d), and (*right*) **TS-Nα-4qB97D** and **TS-Nβ-4qB97D** for ωB97XD/def2-TZVP SMD(MeCN) // B97D/def2-SVP. Free energies provided are relative to the lower energy *Nβ*-arylation TS (either **TS-Nβ-4q, TS-Nβ-4qB3LYP,** or **TS-Nβ-4qB97D**).

Using Multiwfn 3.8 software, IGMH analyses50 (independent gradient model based on Hirshfeld partition of molecular density) were performed to visualize the weak, non-covalent interactions between **4q** and Cu-**L3**/**2a** in **TS-Nα-4q**/**TS-Nβ-4q (Figure S5)**. The TSs leading to regioisomers *Nα* and *Nβ* both exhibit T-shaped π-πinteractions between phenanthroline backbone and **4q** as well as CH…N interactions between the bond-forming heteroatom of pyrazole and the nearby aromatic hydrogen of **2a**. However, in the favored TS (**TS-Nβ-4q**) only, coordination of *Nα* to Cu allows for its adjacent t-butyl group to also engage in favorable CH–π interactions with the phenanthroline backbone. As such, electronic control is perceived to be responsible for the regioselectivity observed under **L5**-control.

**Figure S5.** Non-covalent interaction plots depicting the dispersive interactions (shown in green) of pyrazole substrate **4q** with Cu-L5 and aryne substrate **2a** at the TSs leading to each regioisomer, **TS-Nα-4q** and **TS-Nβ-4q** (isosurface of 0.009).

## 7.2. XYZ Files for Computational Models

122

**Cu-Nα-3t**

*Thermal Free Energy Correction = 1.01326*

*Electronic Energy = -4340.1840533*

*Corrected Free Energy = -4339.17079330*

P 0.1963890 -2.0822590 -0.0415520

P 0.1910130 2.0813000 -0.0404360

Cu -0.8129290 -0.0015380 0.1017280

N -2.7880960 -0.0050050 0.0017300

C -3.7818050 -0.0042720 0.9156830

C -4.6496910 -0.0024760 -1.1136440

C -5.0031490 -0.0026380 0.2467190

H -5.9965640 -0.0017900 0.6734420

N -3.3180150 -0.0038170 -1.2440480

C 1.8278860 2.2327540 -0.8624500

C 2.7330920 1.1680270 -0.8319540

C 2.2359040 3.3921210 -1.5358800

C 3.9984770 1.2251010 -1.4267830

C 3.4764610 3.4706230 -2.1548270

H 1.5652110 4.2438620 -1.5889560

C 4.3538300 2.3900840 -2.0986910

H 3.7635850 4.3750400 -2.6811170

H 5.3214020 2.4621750 -2.5841670

C 1.8348870 -2.2280310 -0.8616950

C 2.7367290 -1.1604180 -0.8313320

C 2.2469050 -3.3863030 -1.5346810

C 4.0024180 -1.2136720 -1.4260260

C 3.4878240 -3.4611420 -2.1532520

H 1.5790730 -4.2402910 -1.5875150

C 4.3616790 -2.3777320 -2.0973860

H 3.7779550 -4.3648610 -2.6790890

H 5.3295580 -2.4468620 -2.5826740

O 2.3554980 0.0033680 -0.1941540

C 4.8981560 0.0072320 -1.2532200

C 0.4601250 -2.9841350 1.5611030

C 0.9825280 -4.4185070 1.4386370

C 1.3589390 -2.1442190 2.4792980

H -0.5404870 -3.0179650 2.0157820

C 1.1241920 -5.0684420 2.8193460

H 1.9648380 -4.4040460 0.9471590

H 0.3137070 -5.0165920 0.8071460

C 1.5157090 -2.8029580 3.8523240

H 2.3472220 -2.0263120 2.0099550

H 0.9404980 -1.1358800 2.5896720

C 2.0334480 -4.2371980 3.7265970

H 1.5144850 -6.0866800 2.7144220

H 0.1311920 -5.1538070 3.2819030

H 2.1864580 -2.2059000 4.4798990

H 0.5371730 -2.8146660 4.3526620

H 2.1129210 -4.7012590 4.7156170

H 3.0461980 -4.2187910 3.3002430

C -0.8973000 -3.1781100 -1.0546830

C -2.2299600 -3.4041810 -0.3196770

C -1.1353320 -2.4892460 -2.4092300

H -0.4277910 -4.1575360 -1.2236090

C -3.2085490 -4.1931650 -1.1949990

H -2.6730240 -2.4301180 -0.0723880

H -2.0606630 -3.9396430 0.6238880

C -2.1145940 -3.2879810 -3.2723490

H -1.5715720 -1.4965820 -2.2236560

H -0.1816260 -2.3471980 -2.9331500

C -3.4388650 -3.4894210 -2.5333260

H -4.1565450 -4.3164970 -0.6602400

H -2.8075560 -5.2015850 -1.3752370

H -2.2812310 -2.7626620 -4.2189720

H -1.6774010 -4.2664880 -3.5204490

H -4.1392900 -4.0636410 -3.1501480

H -3.8887060 -2.5061130 -2.3426060

C 0.4562400 2.9792270 1.5641330

C 1.3684860 2.1442780 2.4736200

C 0.9654690 4.4185410 1.4440810

H -0.5419100 3.0023380 2.0249350

C 1.5254690 2.7985200 3.8487460

H 2.3556230 2.0398450 1.9987680

H 0.9622160 1.1307120 2.5810810

C 1.1088130 5.0645520 2.8264900

H 1.9451790 4.4142940 0.9471500

H 0.2881100 5.0132530 0.8186060

C 2.0295380 4.2379330 3.7263840

H 2.2047310 2.2051670 4.4706520

H 0.5492740 2.7991140 4.3537660

H 1.4898860 6.0864650 2.7233860

H 0.1174080 5.1398010 3.2941990

H 2.1092570 4.6988890 4.7168390

H 3.0405100 4.2302890 3.2955010

C -0.9067060 3.1776350 -1.0483760

C -1.1447560 2.4934030 -2.4052460

C -2.2388750 3.3975560 -0.3105550

H -0.4400430 4.1589480 -1.2142640

C -2.1273680 3.2929820 -3.2637820

H -1.5778740 1.4987310 -2.2231690

H -0.1914140 2.3561660 -2.9311000

C -3.2206710 4.1874870 -1.1813920

H -2.6793880 2.4215650 -0.0662990

H -2.0694010 3.9296720 0.6349060

C -3.4510570 3.4882240 -2.5220580

H -2.2940880 2.7709550 -4.2122120

H -1.6930350 4.2735610 -3.5087150

H -4.1682390 4.3063340 -0.6448630

H -2.8224760 5.1975910 -1.3583400

H -4.1539010 4.0628900 -3.1357030

H -3.8980860 2.5030520 -2.3343480

C 5.4510260 0.0086500 0.1905590

H 4.6390760 0.0075790 0.9234920

H 6.0681860 -0.8805760 0.3553870

H 6.0652470 0.9000270 0.3547340

C 6.0717100 0.0088370 -2.2310000

H 5.7316820 0.0078700 -3.2715130

H 6.7016260 0.8880000 -2.0689840

H 6.7045920 -0.8680720 -2.0683180

C -3.4720380 -0.0065730 2.3974930

C -5.5301280 -0.0011860 -2.3270030

H -6.1780270 0.8819420 -2.3599850

H -4.9056360 -0.0006350 -3.2252310

H -6.1785310 -0.8838860 -2.3614480

C -2.6332510 1.2316230 2.7452520

H -1.7099010 1.2201720 2.1542430

H -3.1735190 2.1541710 2.5050500

H -2.3636470 1.2443310 3.8087590

C -2.6482020 -1.2550940 2.7443790

H -2.3819580 -1.2734040 3.8086770

H -3.1983620 -2.1707610 2.5005090

H -1.7229820 -1.2526650 2.1562750

C -4.7663580 0.0008360 3.2119320

H -5.3632300 0.8902220 2.9846270

H -5.3728150 -0.8822870 2.9855530

H -4.5441750 0.0000670 4.2850530

122

**Cu-Nβ-3t**

*Thermal Free Energy Correction = 1.014369*

*Electronic Energy = -4340.18253660*

*Corrected Free Energy = -4339.16816760*

P -0.2370990 -2.1114740 0.4365320

P -0.6566130 1.9065100 0.1274760

Cu 0.6321170 0.0205410 0.4365810

N 2.5847450 0.2171240 0.5695550

C 3.4498810 0.3654790 1.5918860

C 4.5622160 0.3224050 -0.3159330

C 4.7422830 0.4406480 1.0739030

H 5.6641910 0.5631660 1.6252620

N 3.2599890 0.1898020 -0.6001060

C -1.8149080 1.8927140 -1.2951330

C -2.4976630 0.7122780 -1.6056710

C -2.0518210 2.9993280 -2.1185880

C -3.3783920 0.5947080 -2.6833870

C -2.9066870 2.9097720 -3.2111340

H -1.5423170 3.9367020 -1.9160240

C -3.5628400 1.7133630 -3.4920650

H -3.0648570 3.7746120 -3.8470250

H -4.2278550 1.6596180 -4.3476280

C -1.3552020 -2.5624560 -0.9453440

C -2.2591520 -1.6084890 -1.4227880

C -1.3569910 -3.8108610 -1.5769810

C -3.1300750 -1.8407920 -2.4897460

C -2.1984220 -4.0686530 -2.6530140

H -0.6741820 -4.5845050 -1.2395970

C -3.0762540 -3.0872660 -3.1081530

H -2.1724090 -5.0378040 -3.1402750

H -3.7267510 -3.3037320 -3.9490490

O -2.2869630 -0.3818490 -0.7935520

C -4.1169320 -0.7310240 -2.8384050

C 1.1566710 -3.3206830 0.2979870

C 1.9405620 -2.9991570 -0.9870610

C 2.0496990 -3.1756680 1.5438860

H 0.7771030 -4.3531990 0.2648360

C 3.2391900 -3.8022490 -1.0828180

H 2.1967780 -1.9300520 -0.9840470

H 1.3120340 -3.1796550 -1.8672040

C 3.3433610 -3.9823410 1.4144560

H 2.3143950 -2.1158860 1.6641940

H 1.5015900 -3.4899410 2.4409630

C 4.1062460 -3.5730740 0.1551350

H 3.7798970 -3.5092430 -1.9891670

H 3.0115740 -4.8746020 -1.1755760

H 3.9586220 -3.8258350 2.3074150

H 3.1075410 -5.0555150 1.3700950

H 5.0459530 -4.1317480 0.0762910

H 4.3618220 -2.5051720 0.2241680

C -1.1528870 -2.6099590 1.9872830

C -0.7146840 -1.6858600 3.1389690

C -2.6785400 -2.5808080 1.8131040

H -0.8570560 -3.6420340 2.2315690

C -1.4401490 -2.0217840 4.4433710

H -0.9396610 -0.6443470 2.8605520

H 0.3717200 -1.7318820 3.2780140

C -3.3979130 -2.8959510 3.1278450

H -2.9846700 -1.5873990 1.4541390

H -2.9794070 -3.2958930 1.0401140

C -2.9559740 -1.9585050 4.2524800

H -1.1210730 -1.3340230 5.2339570

H -1.1562800 -3.0329190 4.7670980

H -4.4817680 -2.8351450 2.9797440

H -3.1752160 -3.9324400 3.4176030

H -3.4718440 -2.2114560 5.1850570

H -3.2428410 -0.9275770 3.9980660

C 0.4882500 3.3167480 -0.2157060

C 1.3533190 3.5301040 1.0406940

C 1.3543780 2.9475760 -1.4335470

H -0.0630940 4.2452370 -0.4223800

C 2.4790300 4.5351930 0.7892340

H 1.8091770 2.5707330 1.3207760

H 0.7305170 3.8601470 1.8823210

C 2.4848260 3.9553590 -1.6511270

H 1.8030320 1.9584130 -1.2664530

H 0.7278610 2.8733350 -2.3306130

C 3.3407680 4.0854380 -0.3908250

H 3.0865010 4.6344900 1.6954490

H 2.0515480 5.5261180 0.5776470

H 3.0986640 3.6341360 -2.4993190

H 2.0655710 4.9389540 -1.9104730

H 4.1636650 4.7904200 -0.5558890

H 3.7864800 3.1073720 -0.1552570

C -1.7229260 2.4672450 1.5433390

C -2.2504040 3.9017160 1.4338490

C -2.8850080 1.4847200 1.7461720

H -1.0626020 2.3943610 2.4223020

C -3.0914420 4.2745270 2.6602890

H -2.8673370 3.9827100 0.5268080

H -1.4232240 4.6118260 1.3238990

C -3.7126510 1.8524860 2.9793850

H -3.5333870 1.5097890 0.8580290

H -2.5035240 0.4609270 1.8243960

C -4.2385190 3.2858210 2.8770590

H -3.4796230 5.2929950 2.5503710

H -2.4439540 4.2761270 3.5481930

H -4.5437050 1.1470990 3.0958120

H -3.0854730 1.7568580 3.8775530

H -4.8051740 3.5512170 3.7760250

H -4.9350000 3.3510550 2.0296370

C -4.7103070 -0.9022140 -4.2359870

H -5.4316860 -0.1074010 -4.4447480

H -3.9349420 -0.8845670 -5.0083290

H -5.2548930 -1.8477470 -4.3070150

C -5.2604020 -0.7655370 -1.7980490

H -5.9693110 0.0459910 -1.9925140

H -5.7912000 -1.7214830 -1.8557580

H -4.8691910 -0.6482560 -0.7825580

C 2.9704810 0.3921670 3.0116740

H 1.9413000 0.7714110 3.0685660

H 2.9751720 -0.6067200 3.4678230

H 3.5997630 1.0370080 3.6320300

C 5.5830720 0.3390950 -1.4343480

C 6.9934730 0.4957120 -0.8622890

H 7.2351520 -0.3316880 -0.1859590

H 7.7345920 0.5052990 -1.6695720

H 7.0866770 1.4324680 -0.3017720

C 5.2798650 1.5102180 -2.3809850

H 5.3657040 2.4670760 -1.8529930

H 5.9798440 1.5193980 -3.2257220

H 4.2595940 1.4236960 -2.7679040

C 5.4931730 -0.9741930 -2.2260140

H 5.7476440 -1.8290950 -1.5888420

H 4.4743260 -1.1175110 -2.5996500

H 6.1847610 -0.9629790 -3.0775810

132

**TS-Nα-3t**

*Thermal Free Energy Correction = 1.088364*

*Electronic Energy = -4571.07271827*

*Corrected Free Energy = -4569.98435427*

P 0.0565970 -2.0366090 -0.1719090

P 0.9726110 2.0683440 0.0833790

Cu -0.6241020 0.2997140 0.1937540

N -3.3344140 0.6357010 -0.0352700

C -4.4825330 0.7623060 -0.7186320

C -2.8009760 0.7750680 -2.1604020

C -4.1932790 0.8602380 -2.0870350

H -4.8834630 0.9916160 -2.9093380

N -2.3049470 0.6408290 -0.9180180

C -2.1437670 -0.0886800 1.8605370

C -1.0265320 0.4419570 2.2003460

C -3.0203440 -0.9006940 2.5424720

H -3.9411390 -1.3114480 2.1454550

C -0.5237940 0.1555790 3.4758620

H 0.4349540 0.5228660 3.8402630

C -1.3308410 -0.6404140 4.2955310

H -1.0094350 -0.8629970 5.3096920

C -2.5501440 -1.1670000 3.8353000

H -3.1434740 -1.7958220 4.4933790

C 2.4592260 1.9574430 -0.9856470

C 3.0888250 0.7167830 -1.1413070

C 3.0365810 3.0547800 -1.6338850

C 4.2710160 0.5520630 -1.8684070

C 4.1805650 2.9103190 -2.4104120

H 2.5744700 4.0335010 -1.5406240

C 4.7965880 1.6662100 -2.5185780

H 4.6032870 3.7699250 -2.9201210

H 5.7021610 1.5705340 -3.1083060

C 1.5932920 -2.5001760 -1.0731590

C 2.6523770 -1.5890970 -1.1642820

C 1.7544050 -3.7291510 -1.7249710

C 3.8294700 -1.8595740 -1.8701780

C 2.9032780 -4.0182220 -2.4506710

H 0.9558400 -4.4637900 -1.6839230

C 3.9330900 -3.0843840 -2.5238790

H 2.9988490 -4.9717020 -2.9598330

H 4.8264910 -3.3201170 -3.0923560

O 2.5217900 -0.3763230 -0.5190010

C 4.9381170 -0.8164440 -1.8081260

C 0.2612080 -2.8781870 1.4803040

C 0.2445200 -4.4095360 1.4685090

C 1.5330640 -2.3573060 2.1614250

H -0.5983430 -2.5155010 2.0676780

C 0.3892010 -4.9663160 2.8898850

H 1.0761190 -4.7741040 0.8474140

H -0.6827470 -4.7856680 1.0217790

C 1.6763830 -2.9157700 3.5782340

H 2.4102890 -2.6474550 1.5640360

H 1.5062190 -1.2639950 2.1848490

C 1.6567150 -4.4453320 3.5696760

H 0.3893460 -6.0617650 2.8643650

H -0.4866930 -4.6602220 3.4792250

H 2.6009780 -2.5445000 4.0353090

H 0.8425270 -2.5440220 4.1895090

H 1.7291390 -4.8357490 4.5907670

H 2.5359190 -4.8148390 3.0233820

C -1.2532710 -3.0409650 -1.0228000

C -2.5840410 -2.8827040 -0.2658480

C -1.4099550 -2.5656270 -2.4730770

H -0.9825540 -4.1065310 -1.0208350

C -3.7132730 -3.6317860 -0.9780490

H -2.8464280 -1.8163240 -0.2200020

H -2.4838010 -3.2352360 0.7693430

C -2.5553460 -3.2912830 -3.1837160

H -1.6305530 -1.4932560 -2.4474720

H -0.4718010 -2.6949150 -3.0256970

C -3.8681420 -3.1298470 -2.4143770

H -4.6499670 -3.4990180 -0.4246190

H -3.4950040 -4.7098180 -0.9858060

H -2.6588810 -2.9045270 -4.2041090

H -2.3129060 -4.3604050 -3.2721030

H -4.6782860 -3.6643960 -2.9231160

H -4.1409360 -2.0644270 -2.3893890

C 1.7179170 2.5233850 1.7347580

C 2.7396760 1.4613870 2.1615670

C 2.3395990 3.9221050 1.8173230

H 0.8635420 2.4710420 2.4269070

C 3.2793120 1.7347100 3.5672980

H 3.5813230 1.4705170 1.4534920

H 2.2918570 0.4649830 2.1013390

C 2.8999690 4.1970640 3.2182350

H 3.1496930 3.9990600 1.0769220

H 1.6002080 4.6911030 1.5687040

C 3.9060230 3.1277000 3.6459050

H 4.0106550 0.9664150 3.8423910

H 2.4582590 1.6679710 4.2955010

H 3.3611650 5.1905440 3.2449670

H 2.0675660 4.2144120 3.9354520

H 4.2692240 3.3297490 4.6594420

H 4.7792020 3.1658670 2.9797320

C 0.1148550 3.6240170 -0.4455290

C -0.3992500 3.4779300 -1.8827610

C -1.0635910 3.8685080 0.5175320

H 0.7992280 4.4825240 -0.3899600

C -1.2299060 4.6897550 -2.3107920

H -1.0380960 2.5907440 -1.9120520

H 0.4311750 3.3090870 -2.5790240

C -1.8926060 5.0798340 0.0822730

H -1.7119080 2.9802980 0.5232470

H -0.7018390 4.0054540 1.5444580

C -2.4005450 4.9058200 -1.3500820

H -1.5956790 4.5422260 -3.3334850

H -0.5962050 5.5885190 -2.3253210

H -2.7317100 5.2158130 0.7730470

H -1.2765050 5.9888300 0.1428290

H -2.9918430 5.7764110 -1.6548240

H -3.0633170 4.0292630 -1.3925880

C 5.6352080 -0.9427360 -0.4332950

H 6.0978240 -1.9305400 -0.3369630

H 6.4108520 -0.1761590 -0.3336540

H 4.9161210 -0.8167990 0.3823200

C 5.9785670 -1.0053400 -2.9108940

H 6.7694720 -0.2555630 -2.8216150

H 6.4605010 -1.9824800 -2.8190220

H 5.5309200 -0.9268400 -3.9067190

C -1.9237990 0.8128080 -3.3770820

H -1.9585510 1.7899430 -3.8731240

H -0.8813890 0.6103230 -3.1069640

H -2.2355760 0.0618040 -4.1117470

C -5.8280910 0.7340170 -0.0303560

C -6.2798740 -0.7289310 0.1156810

H -7.2535170 -0.7918000 0.6168020

H -6.3633270 -1.2056050 -0.8676870

H -5.5516940 -1.3011170 0.7008490

C -5.7284670 1.3875280 1.3528490

H -5.4234600 2.4351780 1.2605650

H -6.6992280 1.3510980 1.8611220

H -4.9859750 0.8829070 1.9768830

C -6.8624450 1.4891990 -0.8725640

H -6.9968130 1.0180840 -1.8519620

H -7.8343610 1.4932850 -0.3661000

H -6.5513380 2.5266070 -1.0331080

132

**TS-Nβ-3t**

*Thermal Free Energy Correction = 1.087835*

*Electronic Energy = -4571.07027409*

*Corrected Free Energy = -4569.98243909*

P -0.2014500 -2.0525580 -0.0082890

P 0.7008860 2.0102890 0.6179200

Cu -0.8348580 0.3368530 -0.2756420

N -2.8319780 0.5381300 0.1595700

C -3.7904830 0.3618880 1.0914160

C -4.7335270 0.3311520 -0.9117560

C -5.0263970 0.2227100 0.4529470

H -5.9972260 0.0744840 0.9067140

N -3.4192260 0.5184750 -1.0666830

C 2.3516240 1.9546650 -0.1930820

C 2.9018520 0.7275870 -0.5835810

C 3.0797050 3.1076120 -0.5092410

C 4.1081820 0.6225100 -1.2849880

C 4.2713750 3.0377280 -1.2197360

H 2.6943810 4.0791750 -0.2137660

C 4.7752610 1.8005580 -1.6117450

H 4.8100310 3.9461770 -1.4686070

H 5.7058950 1.7580160 -2.1675190

C 1.2050070 -2.3662190 -1.1481910

C 2.2956220 -1.4883940 -1.1102450

C 1.2831290 -3.4444140 -2.0328620

C 3.4535600 -1.6782700 -1.8665350

C 2.3953840 -3.6225000 -2.8501840

H 0.4561280 -4.1456130 -2.0964180

C 3.4753200 -2.7501400 -2.7587240

H 2.4293130 -4.4539480 -3.5466150

H 4.3485360 -2.9186430 -3.3799830

O 2.2142150 -0.4152440 -0.2462080

C 4.6447040 -0.7758460 -1.5662290

C 0.3280330 -3.0555850 1.4965210

C 0.1535630 -4.5764620 1.3807460

C 1.7847280 -2.7491280 1.8829330

H -0.3184900 -2.6915980 2.3102320

C 0.5440410 -5.2769370 2.6884970

H 0.7880720 -4.9431980 0.5596830

H -0.8783340 -4.8421650 1.1317670

C 2.1551910 -3.4149960 3.2102560

H 2.4447870 -3.1414510 1.0959930

H 1.9569330 -1.6717250 1.9268810

C 1.9685710 -4.9303900 3.1231480

H 0.4311510 -6.3609850 2.5757920

H -0.1575130 -4.9665220 3.4754600

H 3.1906360 -3.1705880 3.4743050

H 1.5180480 -3.0117880 4.0103380

H 2.1997650 -5.4050100 4.0830690

H 2.6781900 -5.3344560 2.3878220

C -1.5927670 -3.0616640 -0.7085120

C -2.7695030 -2.9992430 0.2826030

C -2.0601970 -2.5600640 -2.0833900

H -1.2744470 -4.1095210 -0.8095630

C -3.9464980 -3.8437120 -0.2111990

H -3.0927370 -1.9536170 0.3746460

H -2.4627500 -3.3302180 1.2842450

C -3.2194070 -3.4226030 -2.5926510

H -2.4144470 -1.5267780 -1.9857510

H -1.2325420 -2.5503510 -2.8025800

C -4.3891240 -3.3953600 -1.6051480

H -4.7794770 -3.7606630 0.4961360

H -3.6510330 -4.9030360 -0.2397140

H -3.5444290 -3.0609730 -3.5746390

H -2.8786800 -4.4595790 -2.7306370

H -5.2119900 -4.0229950 -1.9658140

H -4.7669320 -2.3666240 -1.5319780

C 1.1281080 2.0911380 2.4299380

C 1.5784480 0.7006880 2.8909660

C 2.1488560 3.1587430 2.8356280

H 0.1745270 2.3132790 2.9314720

C 1.8537720 0.6658140 4.3953240

H 2.4947610 0.4262850 2.3455060

H 0.8136570 -0.0394970 2.6231900

C 2.4093450 3.1235420 4.3461740

H 3.0917450 2.9742390 2.3024950

H 1.8032020 4.1567720 2.5409310

C 2.8709670 1.7359450 4.7965530

H 2.2072020 -0.3302260 4.6866990

H 0.9114820 0.8401640 4.9336590

H 3.1550010 3.8804700 4.6135180

H 1.4843320 3.3866670 4.8777690

H 3.0342370 1.7213700 5.8796340

H 3.8372740 1.5086880 4.3249510

C 0.0802000 3.7203810 0.2380520

C -0.0704990 3.9309360 -1.2772270

C -1.2817320 3.8937510 0.9377300

H 0.7698310 4.4794190 0.6359650

C -0.6905570 5.2937860 -1.5912050

H -0.7266200 3.1518030 -1.6799140

H 0.8923040 3.8187080 -1.7869870

C -1.9129370 5.2490690 0.6065590

H -1.9560900 3.0859430 0.6140580

H -1.1687100 3.7977220 2.0251290

C -2.0492420 5.4415330 -0.9044060

H -0.7950500 5.4043690 -2.6763610

H -0.0196030 6.0955080 -1.2498290

H -2.8910710 5.3261190 1.0939960

H -1.2861060 6.0528620 1.0185610

H -2.4900400 6.4196920 -1.1263430

H -2.7339720 4.6792990 -1.3019050

C 5.3094430 -1.2970300 -0.2707120

H 5.6729860 -2.3192140 -0.4197350

H 6.1533140 -0.6553970 0.0040860

H 4.5944040 -1.3026090 0.5585900

C 5.6775010 -0.7846290 -2.6929240

H 6.5368850 -0.1612690 -2.4319070

H 6.0617010 -1.7958070 -2.8512500

H 5.2511770 -0.4199280 -3.6329280

C -0.2835070 0.4977320 -2.2320350

C -1.4767330 0.9163780 -2.4243420

C 0.6915490 0.8234450 -3.1824370

C -2.0632740 1.6260190 -3.4413740

C 0.2394210 1.5626290 -4.2816700

H 1.7360800 0.5287080 -3.1034370

C -1.1033130 1.9587860 -4.4090280

H -3.1049860 1.9185650 -3.4857540

H 0.9431470 1.8378750 -5.0626130

H -1.4082200 2.5334860 -5.2794210

C -3.5249760 0.3560580 2.5825040

C -2.0388540 0.1484970 2.8775260

H -1.8607940 0.1407920 3.9599960

H -1.6841250 -0.8010150 2.4580430

H -1.4447640 0.9530240 2.4332200

C -4.3268550 -0.7739360 3.2433860

H -4.1435200 -0.7915790 4.3243510

H -5.4017100 -0.6419090 3.0858630

H -4.0419470 -1.7465930 2.8271650

C -3.9683460 1.7037830 3.1756290

H -3.8014890 1.7267170 4.2597290

H -3.4056290 2.5261180 2.7199280

H -5.0320320 1.8780170 2.9848420

C -5.6452480 0.2818590 -2.1002490

H -6.1175430 1.2521940 -2.2920860

H -5.0774550 -0.0004310 -2.9926890

H -6.4454910 -0.4506250 -1.9576250

132

**TS-Nα-3tB3LYP**

*Thermal Free Energy Correction = 1.081245*

*Electronic Energy = -4572.39240232*

*Corrected Free Energy = -4571.31115732*

P 0.3935190 -2.0794560 0.2386040

P 0.6027660 2.0308380 0.0222380

Cu -0.5344980 0.0406750 0.3173550

N -3.2877110 0.1183740 -0.3461790

C -4.2305330 0.0462970 -1.3072580

C -2.2318300 -0.0494640 -2.2848890

C -3.6039080 -0.0603570 -2.5628040

H -4.0723380 -0.1296130 -3.5350150

N -2.0623900 0.0566830 -0.9480220

C -2.3411630 0.1348640 1.9742520

C -1.0749700 0.1852600 2.2177490

C -3.4426440 0.1706180 2.7854150

H -4.4750690 0.1262160 2.4620920

C -0.6765370 0.2912540 3.5600800

H 0.3650200 0.3396400 3.8703340

C -1.7083290 0.3372400 4.5135830

H -1.4546000 0.4236140 5.5678190

C -3.0607120 0.2772440 4.1401570

H -3.8328030 0.3163730 4.9053600

C 1.9286350 2.1149670 -1.2528940

C 2.7192150 0.9768710 -1.4776560

C 2.2258490 3.2559370 -2.0128380

C 3.7625390 0.9314430 -2.4093320

C 3.2338720 3.2337670 -2.9752250

H 1.6553910 4.1665420 -1.8616700

C 3.9937930 2.0795310 -3.1721660

H 3.4378910 4.1216540 -3.5668990

H 4.7841270 2.0873720 -3.9148850

C 1.8293740 -2.4225200 -0.8692830

C 2.6799240 -1.3762250 -1.2607960

C 2.1011130 -3.6922720 -1.4042890

C 3.7358290 -1.5361440 -2.1682460

C 3.1372160 -3.8847540 -2.3147570

H 1.4810490 -4.5365370 -1.1218000

C 3.9418070 -2.8110860 -2.7000920

H 3.3207380 -4.8729330 -2.7268190

H 4.7431090 -2.9793550 -3.4112880

O 2.4579250 -0.1349150 -0.6993460

C 4.6376970 -0.3261200 -2.4337820

C 1.0048640 -2.6083460 1.9258790

C 1.4755550 -4.0642660 2.0718290

C 2.0955970 -1.6286910 2.3887570

H 0.1279940 -2.4470830 2.5690080

C 1.9365340 -4.3560190 3.5109630

H 2.3099990 -4.2448540 1.3797170

H 0.6760640 -4.7619760 1.7967850

C 2.5519460 -1.9230530 3.8235070

H 2.9585760 -1.6941530 1.7103550

H 1.7099070 -0.6100500 2.3099190

C 3.0266720 -3.3757510 3.9675210

H 2.2962650 -5.3904070 3.5838730

H 1.0725560 -4.2743990 4.1867860

H 3.3480740 -1.2248390 4.1134290

H 1.7099930 -1.7461360 4.5088870

H 3.3170120 -3.5846300 5.0049420

H 3.9259610 -3.5236460 3.3510690

C -0.8573670 -3.3968710 -0.2084280

C -2.1090560 -3.2086960 0.6803310

C -1.2515820 -3.3318360 -1.6967110

H -0.4316970 -4.3894200 -0.0028750

C -3.2007040 -4.2334640 0.3359850

H -2.5086420 -2.2011200 0.5207000

H -1.8476940 -3.2827970 1.7432930

C -2.3307170 -4.3714980 -2.0317600

H -1.6512890 -2.3367670 -1.9062780

H -0.3768710 -3.4733320 -2.3404810

C -3.5716360 -4.1709730 -1.1521260

H -4.0850550 -4.0449610 0.9578250

H -2.8488090 -5.2470700 0.5822830

H -2.5978480 -4.2930730 -3.0933550

H -1.9300670 -5.3857810 -1.8793970

H -4.3384230 -4.9203220 -1.3877060

H -4.0015820 -3.1845200 -1.3740550

C 1.4748290 2.6563850 1.5684030

C 2.8365600 1.9544940 1.7473890

C 1.6632590 4.1782130 1.7030630

H 0.8080500 2.3178660 2.3732110

C 3.4477250 2.2756730 3.1178130

H 3.5207490 2.3045590 0.9620810

H 2.7378990 0.8772100 1.6086200

C 2.2966120 4.5304800 3.0617040

H 2.3091460 4.5374430 0.8881720

H 0.7086620 4.7059810 1.6102950

C 3.6216610 3.7907840 3.2947530

H 4.4124220 1.7633280 3.2274790

H 2.7913210 1.8844460 3.9096760

H 2.4473320 5.6154330 3.1315720

H 1.5883430 4.2601930 3.8587700

H 4.0156320 4.0216090 4.2926590

H 4.3671450 4.1498910 2.5697240

C -0.5798330 3.4078230 -0.4214180

C -1.1783330 3.2524180 -1.8329430

C -1.7182620 3.4256680 0.6257580

H -0.0456680 4.3672650 -0.3755050

C -2.1760250 4.3820960 -2.1312570

H -1.7018100 2.2952090 -1.8864800

H -0.3909790 3.2341360 -2.5942380

C -2.7208230 4.5516680 0.3336770

H -2.2450890 2.4657040 0.5865070

H -1.3186740 3.5230910 1.6429630

C -3.2967840 4.4180380 -1.0832510

H -2.5973190 4.2430340 -3.1349820

H -1.6495180 5.3492110 -2.1393090

H -3.5273640 4.5267120 1.0773580

H -2.2228290 5.5280330 0.4374160

H -3.9950490 5.2385110 -1.2931810

H -3.8680160 3.4817560 -1.1471600

C 5.6472260 -0.2187160 -1.2546570

H 6.2741510 -1.1165090 -1.2093100

H 6.2926980 0.6570250 -1.3870110

H 5.1223530 -0.1169450 -0.2996150

C 5.4201000 -0.4631900 -3.7485370

H 6.0775540 0.3980060 -3.8993450

H 6.0655110 -1.3461470 -3.7259630

H 4.7486760 -0.5441220 -4.6096610

C -1.0509370 -0.1039700 -3.2085400

H -0.7995450 0.8838490 -3.6164560

H -0.1666260 -0.4691040 -2.6733440

H -1.2356080 -0.7744230 -4.0552740

C -5.7048700 0.0776430 -0.9467100

C -6.0453670 -1.1436250 -0.0629310

H -7.0936070 -1.1113020 0.2619160

H -5.8888470 -2.0778380 -0.6140000

H -5.4048520 -1.1722150 0.8237400

C -6.0155460 1.3740100 -0.1660370

H -5.8341370 2.2556290 -0.7916060

H -7.0650520 1.3945950 0.1555760

H -5.3758400 1.4582860 0.7176730

C -6.5692670 0.0343560 -2.2182670

H -6.3838750 -0.8818570 -2.7908260

H -7.6344220 0.0618580 -1.9583210

H -6.3559920 0.8897750 -2.8696490

132

**TS-Nβ-3tB3LYP**

*Thermal Free Energy Correction = 1.083106*

*Electronic Energy = -4572.38738869*

*Corrected Free Energy = -4571.30428269*

P -0.5022840 -1.9941920 -0.0046120

P 0.9207370 1.9246960 0.4407330

Cu -0.7544160 0.3665210 -0.1982310

N -2.6601600 0.7946940 0.3125160

C -3.5613360 0.8029180 1.3304810

C -4.6654120 0.9347240 -0.5995970

C -4.8497120 0.8854160 0.7920520

H -5.7881290 0.9167350 1.3280870

N -3.3535890 0.8806370 -0.8713200

C 2.5962670 1.5713310 -0.2571090

C 3.0052360 0.2579310 -0.5334200

C 3.5011670 2.5957200 -0.5837550

C 4.2225760 -0.0530080 -1.1589940

C 4.7161540 2.3213500 -1.2040800

H 3.2426460 3.6265020 -0.3680790

C 5.0665800 1.0040930 -1.5024780

H 5.3908440 3.1333690 -1.4595510

H 6.0127560 0.8055140 -1.9938300

C 0.8938970 -2.5666260 -1.0643420

C 2.1137720 -1.8791260 -0.9869850

C 0.8411560 -3.6696580 -1.9275420

C 3.2654710 -2.2685190 -1.6800770

C 1.9530740 -4.0482660 -2.6787930

H -0.0806530 -4.2316930 -2.0286510

C 3.1587160 -3.3586420 -2.5483100

H 1.8854840 -4.8948460 -3.3560760

H 4.0211090 -3.6849540 -3.1193000

O 2.1636340 -0.7700860 -0.1597620

C 4.5663910 -1.5327730 -1.3491130

C -0.1724640 -2.9825150 1.5678080

C -0.2598920 -4.5142810 1.4375070

C 1.1796780 -2.5851890 2.1882460

H -0.9608370 -2.6538780 2.2550960

C -0.0442370 -5.1950840 2.8017190

H 0.5039960 -4.8600550 0.7269220

H -1.2311990 -4.8213610 1.0350970

C 1.3754450 -3.2425770 3.5613050

H 1.9902140 -2.9107110 1.5221380

H 1.2568100 -1.5003370 2.2618110

C 1.2789110 -4.7709510 3.4545660

H -0.0798300 -6.2856590 2.6822980

H -0.8770160 -4.9250840 3.4679500

H 2.3454190 -2.9475440 3.9825210

H 0.6047080 -2.8726560 4.2537760

H 1.3815470 -5.2352020 4.4436570

H 2.1163540 -5.1395950 2.8435420

C -2.0018950 -2.8490970 -0.7263860

C -3.1988410 -2.7025770 0.2385330

C -2.3771550 -2.2947440 -2.1150530

H -1.7780960 -3.9202630 -0.8280170

C -4.4511650 -3.3944790 -0.3224870

H -3.4070510 -1.6387340 0.3911610

H -2.9618180 -3.1285030 1.2210600

C -3.6088640 -3.0193100 -2.6770160

H -2.6163410 -1.2329770 -2.0150580

H -1.5310980 -2.3668740 -2.8077910

C -4.8034760 -2.8759120 -1.7230100

H -5.2920390 -3.2384610 0.3651820

H -4.2765920 -4.4805660 -0.3694240

H -3.8571870 -2.6088470 -3.6640890

H -3.3822300 -4.0867890 -2.8256860

H -5.6798480 -3.4064200 -2.1174820

H -5.0722830 -1.8138220 -1.6486530

C 1.2973760 2.3242230 2.2409110

C 1.3973150 1.0183600 3.0457620

C 2.5139580 3.2238760 2.5213710

H 0.4023150 2.8603160 2.5811830

C 1.5582900 1.2839700 4.5488680

H 2.2595260 0.4415860 2.6805490

H 0.5079790 0.4068050 2.8674530

C 2.6548660 3.5035200 4.0280090

H 3.4246400 2.7280360 2.1614810

H 2.4334510 4.1721880 1.9765070

C 2.7571460 2.1994710 4.8322250

H 1.6630420 0.3324420 5.0859480

H 0.6402110 1.7591550 4.9248640

H 3.5347930 4.1344590 4.2078280

H 1.7808920 4.0751870 4.3734440

H 2.8292490 2.4166770 5.9053790

H 3.6839420 1.6768150 4.5521480

C 0.5029170 3.6252280 -0.2517810

C 0.6379980 3.7232210 -1.7854860

C -0.9386540 3.9871240 0.1766600

H 1.1858840 4.3585720 0.2019420

C 0.2334970 5.1155610 -2.2922280

H -0.0111990 2.9821880 -2.2519050

H 1.6560480 3.4892370 -2.1087360

C -1.3509540 5.3717660 -0.3461190

H -1.6318060 3.2278980 -0.2072460

H -1.0349940 3.9690660 1.2675280

C -1.1998600 5.4633460 -1.8697460

H 0.3293380 5.1451770 -3.3851040

H 0.9257860 5.8727010 -1.8923330

H -2.3862820 5.5799710 -0.0482230

H -0.7240280 6.1431260 0.1269710

H -1.4752550 6.4651410 -2.2237840

H -1.8930360 4.7531140 -2.3430430

C 5.0904480 -2.0828500 0.0086340

H 5.3082250 -3.1536340 -0.0751700

H 6.0068120 -1.5578670 0.3016480

H 4.3472720 -1.9444200 0.7999700

C 5.6450250 -1.7476470 -2.4205960

H 6.5751620 -1.2436130 -2.1420950

H 5.8840460 -2.8106660 -2.5190900

H 5.3234700 -1.3709380 -3.3972490

C -0.3058590 0.3988360 -2.1219240

C -1.4398560 0.9800030 -2.3280230

C 0.6383870 0.3618320 -3.1538600

C -1.9561580 1.5750450 -3.4514510

C 0.2356320 0.9502060 -4.3647020

H 1.6216010 -0.0897670 -3.0528660

C -1.0287980 1.5478040 -4.5131480

H -2.9372940 2.0301490 -3.5243200

H 0.9167930 0.9410890 -5.2129200

H -1.3009790 1.9945900 -5.4669370

C -3.1499900 0.7763750 2.7921030

C -2.2945320 -0.4694960 3.0868070

H -1.9373320 -0.4662130 4.1248390

H -2.8719990 -1.3855250 2.9232790

H -1.4263260 -0.4960040 2.4239310

C -4.3896390 0.7585760 3.7025340

H -4.0854640 0.7355420 4.7560660

H -5.0080140 1.6497490 3.5482760

H -5.0104150 -0.1234140 3.5079960

C -2.3140890 2.0350640 3.0930210

H -1.9606530 2.0406300 4.1328530

H -1.4497680 2.0603500 2.4291840

H -2.8985080 2.9453200 2.9177920

C -5.6778100 1.0507140 -1.6998310

H -5.1960090 0.8926970 -2.6707000

H -6.4772930 0.3072490 -1.5935870

H -6.1552110 2.0395690 -1.7158240

132

**TS-Nα-3tB97D**

*Thermal Free Energy Correction = 1.038257*

*Electronic Energy = -4571.83505194*

*Corrected Free Energy = -4570.79679494*

P 0.6400510 -2.0369100 -0.0017240

P 0.3817760 2.0918530 0.2780490

Cu -0.5613750 -0.0573880 0.3462440

N -3.3612580 -0.0970250 -0.3365490

C -4.2876170 -0.0118440 -1.3149320

C -2.2644990 0.0716740 -2.2597660

C -3.6383670 0.0970430 -2.5680250

H -4.0981330 0.1779990 -3.5555870

N -2.1326660 -0.0426850 -0.9130950

C -2.2580820 -0.2092530 2.0756550

C -0.9810690 -0.2305080 2.3137350

C -3.3459510 -0.3038190 2.9176020

H -4.3987060 -0.2784950 2.6149670

C -0.5315900 -0.3687970 3.6409540

H 0.5267760 -0.3939630 3.9345970

C -1.5544750 -0.4764590 4.6170910

H -1.2758710 -0.5888240 5.6740310

C -2.9237730 -0.4445460 4.2695450

H -3.6843800 -0.5316650 5.0582130

C 1.7880880 2.4733150 -0.8606960

C 2.6451950 1.4345660 -1.2892210

C 2.0133940 3.7595040 -1.3959760

C 3.6771560 1.6246170 -2.2328170

C 3.0251560 3.9793950 -2.3421870

H 1.3720260 4.5901190 -1.0815730

C 3.8439770 2.9166070 -2.7617110

H 3.1784510 4.9832490 -2.7572620

H 4.6308360 3.1047500 -3.4998920

C 1.9757070 -2.0896280 -1.2749230

C 2.7331730 -0.9216990 -1.5150760

C 2.2812290 -3.2317810 -2.0432240

C 3.7598610 -0.8523400 -2.4788410

C 3.2792620 -3.1874240 -3.0289090

H 1.7184220 -4.1572070 -1.8766720

C 4.0087410 -2.0053340 -3.2450460

H 3.4964140 -4.0796540 -3.6291610

H 4.7932220 -1.9914460 -4.0092190

O 2.4443790 0.1847900 -0.7455610

C 4.6007750 0.4328750 -2.5309210

C 1.5169070 -2.6817740 1.5421010

C 1.6592530 -4.2121960 1.6557470

C 2.8999220 -2.0116620 1.7076690

H 0.8643610 -2.3323040 2.3667540

C 2.3029040 -4.5985770 3.0041760

H 2.2902580 -4.5815900 0.8207780

H 0.6740200 -4.7042910 1.5669130

C 3.5251050 -2.3743190 3.0664090

H 3.5648050 -2.3720770 0.8970860

H 2.8237550 -0.9190320 1.5887460

C 3.6587850 -3.9006600 3.2163570

H 2.4193810 -5.6986480 3.0656890

H 1.6120390 -4.3018520 3.8208170

H 4.5138590 -1.8852820 3.1714320

H 2.8813360 -1.9784140 3.8797750

H 4.0748490 -4.1612730 4.2094810

H 4.3787610 -4.2716940 2.4568320

C -0.5433400 -3.4062200 -0.4820970

C -1.6977700 -3.4012250 0.5510540

C -1.1045090 -3.2165040 -1.9079890

H -0.0157910 -4.3808170 -0.4346430

C -2.7549980 -4.4690480 0.2183190

H -2.1772480 -2.4048590 0.5254680

H -1.3072840 -3.5486510 1.5768660

C -2.1573310 -4.2911390 -2.2359650

H -1.5847580 -2.2265340 -1.9621100

H -0.2899190 -3.2322010 -2.6546560

C -3.3010780 -4.2714410 -1.2067620

H -3.5770830 -4.4166810 0.9588540

H -2.3031810 -5.4807540 0.3034470

H -2.5528090 -4.1198830 -3.2564170

H -1.6792870 -5.2945910 -2.2362420

H -4.0540350 -5.0485090 -1.4455180

H -3.8107240 -3.2886680 -1.2593250

C 1.0458100 2.5889800 1.9614590

C 2.1175330 1.5742150 2.4025350

C 1.5634870 4.0336410 2.0825620

H 0.1700590 2.4605720 2.6297870

C 2.6168550 1.8662200 3.8277070

H 2.9726570 1.6184820 1.6973800

H 1.6926690 0.5598100 2.3344570

C 2.0658180 4.3219190 3.5126110

H 2.3975130 4.1768180 1.3659100

H 0.7708020 4.7557380 1.8095950

C 3.1413580 3.3088880 3.9468370

H 3.4036890 1.1386700 4.1096520

H 1.7749690 1.7254580 4.5370620

H 2.4593370 5.3558180 3.5737470

H 1.2077490 4.2609180 4.2142370

H 3.4728130 3.5181040 4.9829510

H 4.0312840 3.4244860 3.2927000

C -0.9065210 3.3998380 -0.0991800

C -1.3353360 3.3539230 -1.5817930

C -2.1220660 3.1373080 0.8256940

H -0.4925520 4.4051840 0.1248620

C -2.4877450 4.3338270 -1.8645430

H -1.6860940 2.3332980 -1.8060220

H -0.4753630 3.5641750 -2.2435510

C -3.2832720 4.1027070 0.5255140

H -2.4717800 2.1017110 0.6576820

H -1.8245890 3.2148910 1.8893890

C -3.6912240 4.0302400 -0.9561430

H -2.7791670 4.2617480 -2.9308550

H -2.1449950 5.3766430 -1.6900330

H -4.1439430 3.8515990 1.1758000

H -2.9795230 5.1427240 0.7724100

H -4.5255700 4.7293340 -1.1634470

H -4.0511550 3.0058600 -1.1791410

C 5.6470220 0.3504410 -1.3770020

H 6.3153120 -0.5178030 -1.5339020

H 6.2546760 1.2751760 -1.3502690

H 5.1426250 0.2326320 -0.4006130

C 5.3446580 0.5906000 -3.8691450

H 5.9710010 1.5001340 -3.8572970

H 6.0245420 -0.2638430 -4.0345990

H 4.6387090 0.6544340 -4.7175520

C -1.0493080 0.1378110 -3.1436150

H -1.0353780 1.0559620 -3.7643320

H -0.1392080 0.1365080 -2.5140220

H -0.9870070 -0.7297780 -3.8311570

C -5.7707110 -0.0626510 -0.9762320

C -6.0954400 -1.4286760 -0.3222310

H -7.1643270 -1.4791290 -0.0313470

H -5.8836570 -2.2559690 -1.0262970

H -5.4698820 -1.5787130 0.5769110

C -6.1144720 1.0695110 0.0225770

H -5.9299550 2.0604360 -0.4332320

H -7.1802590 1.0132850 0.3227810

H -5.4812800 0.9882170 0.9248250

C -6.6192420 0.1077820 -2.2509660

H -6.4054950 -0.6988690 -2.9779850

H -7.6976620 0.0736860 -2.0010750

H -6.4050860 1.0775550 -2.7396750

132

**TS-Nβ-3tB97D**

*Thermal Free Energy Correction = 1.040308*

*Electronic Energy = -4571.83194205*

*Corrected Free Energy = -4570.79163405*

P -0.5721670 -2.0027930 0.1324330

P 0.9295120 1.9079300 0.3042770

Cu -0.7722520 0.3553890 -0.2972420

N -2.6815750 0.8505760 0.2049900

C -3.5028090 0.8935360 1.2921780

C -4.7460340 0.8559770 -0.5659230

C -4.8365770 0.8942860 0.8439980

H -5.7422140 0.9329390 1.4534440

N -3.4505760 0.8295140 -0.9281220

C 2.6316400 1.5068230 -0.3028040

C 3.0137050 0.1616420 -0.4991730

C 3.5625680 2.5036690 -0.6631830

C 4.2376510 -0.2075430 -1.0981540

C 4.7926930 2.1679850 -1.2465280

H 3.3049050 3.5578620 -0.5128670

C 5.1172770 0.8207190 -1.4781770

H 5.4984520 2.9578530 -1.5319130

H 6.0751400 0.5712450 -1.9468190

C 0.8406430 -2.6655150 -0.8617170

C 2.0772590 -1.9858260 -0.8215420

C 0.7658100 -3.8190480 -1.6679250

C 3.2294370 -2.4386110 -1.4974170

C 1.8780650 -4.2621980 -2.3996130

H -0.1770060 -4.3718310 -1.7327980

C 3.1037940 -3.5822870 -2.3055530

H 1.7948270 -5.1526640 -3.0349000

H 3.9716670 -3.9573820 -2.8582040

O 2.1401570 -0.8197100 -0.0841390

C 4.5491800 -1.7063580 -1.2121030

C -0.2914660 -2.8978820 1.7784570

C -0.0631810 -4.4169270 1.6494640

C 0.8331820 -2.2331080 2.5921080

H -1.2363650 -2.7400720 2.3322050

C 0.0966480 -5.0721000 3.0365830

H 0.8543220 -4.5942520 1.0540670

H -0.9001300 -4.8907070 1.1028910

C 0.9968780 -2.8960800 3.9716540

H 1.7860860 -2.3058910 2.0318580

H 0.6045690 -1.1625190 2.7113410

C 1.2315950 -4.4113070 3.8398850

H 0.2831540 -6.1581090 2.9206460

H -0.8545380 -4.9664120 3.5993610

H 1.8296920 -2.4167850 4.5234430

H 0.0745380 -2.7211960 4.5642720

H 1.3222450 -4.8796200 4.8397350

H 2.1939200 -4.5835450 3.3129620

C -2.0811420 -2.8913140 -0.5405040

C -3.2924090 -2.6528370 0.3945390

C -2.4163600 -2.4140040 -1.9697360

H -1.8733230 -3.9813840 -0.5618450

C -4.5570050 -3.3431620 -0.1518280

H -3.4752740 -1.5657830 0.4774340

H -3.0828570 -3.0324250 1.4126230

C -3.6610870 -3.1373150 -2.5130120

H -2.6322870 -1.3328430 -1.9249670

H -1.5510180 -2.5505220 -2.6445050

C -4.8691040 -2.8962080 -1.5902910

H -5.4122160 -3.1202500 0.5159450

H -4.4083260 -4.4443430 -0.1349420

H -3.8797560 -2.7785840 -3.5380970

H -3.4617990 -4.2286460 -2.5863740

H -5.7657330 -3.4239380 -1.9720350

H -5.0972670 -1.8131400 -1.5826710

C 1.2222060 2.3204030 2.1278590

C 2.1989860 1.3016570 2.7553580

C 1.6800260 3.7543600 2.4579110

H 0.2298910 2.1654240 2.5924480

C 2.2585960 1.4746090 4.2831960

H 3.2076740 1.4723160 2.3289380

H 1.9153520 0.2714920 2.4845890

C 1.7614610 3.9496860 3.9869900

H 2.6772970 3.9319810 2.0050500

H 0.9864680 4.4992460 2.0276560

C 2.6814390 2.9087740 4.6518390

H 2.9602010 0.7379630 4.7223710

H 1.2565800 1.2621070 4.7109380

H 2.1071770 4.9763100 4.2193510

H 0.7389330 3.8509920 4.4074590

H 2.6838840 3.0448290 5.7512400

H 3.7228260 3.0739700 4.3037730

C 0.5753800 3.5671970 -0.5109690

C 0.7175090 3.5167340 -2.0493770

C -0.8482320 4.0137660 -0.1036450

H 1.2999750 4.3108760 -0.1214830

C 0.3362140 4.8648150 -2.6871140

H 0.0489170 2.7406720 -2.4505520

H 1.7444500 3.2324250 -2.3374000

C -1.2415470 5.3442800 -0.7715690

H -1.5689470 3.2206700 -0.3841450

H -0.9086650 4.1246480 0.9943620

C -1.0969720 5.2697240 -2.3007940

H 0.4368270 4.7908710 -3.7877400

H 1.0424930 5.6529750 -2.3477820

H -2.2799370 5.6054740 -0.4884980

H -0.5863850 6.1544940 -0.3858200

H -1.3680540 6.2392270 -2.7637040

H -1.8026160 4.5089350 -2.6933950

C 5.0653260 -2.1912140 0.1774370

H 5.2620810 -3.2800230 0.1490140

H 6.0008680 -1.6607930 0.4390640

H 4.3164020 -1.9898370 0.9647010

C 5.6243810 -2.0020900 -2.2723810

H 6.5704100 -1.4936950 -2.0148810

H 5.8400620 -3.0846890 -2.3080070

H 5.3031550 -1.6696390 -3.2767560

C -0.2165450 0.1875210 -2.2303920

C -1.3577330 0.7380490 -2.5122920

C 0.7821970 0.0479240 -3.2047450

C -1.8207630 1.2614640 -3.7034840

C 0.4228410 0.5507780 -4.4809380

H 1.7678200 -0.4019060 -3.0279460

C -0.8378380 1.1440090 -4.7255400

H -2.8047640 1.7177990 -3.8620730

H 1.1438800 0.4772140 -5.3069070

H -1.0672300 1.5224370 -5.7317750

C -2.9968650 1.0338750 2.7231350

C -1.7927060 0.1097810 2.9898860

H -1.4102330 0.2578450 4.0192920

H -2.0882090 -0.9475070 2.8763930

H -0.9717820 0.3100030 2.2804350

C -4.1192790 0.6765290 3.7204400

H -3.7457930 0.7628850 4.7597220

H -4.9826200 1.3583090 3.6081560

H -4.4742840 -0.3588820 3.5573060

C -2.5669320 2.5023030 2.9572620

H -2.1787330 2.6417350 3.9870580

H -1.7785350 2.7788910 2.2392780

H -3.4218110 3.1873220 2.8028510

C -5.8436760 0.8608910 -1.5947210

H -5.4205390 0.6687570 -2.5983970

H -6.6039940 0.0826080 -1.3838230

H -6.3749250 1.8349610 -1.6274260

132

**TS-MINα-3t**

*Thermal Free Energy Correction = 1.090497*

*Electronic Energy = -4571.05967414*

*Corrected Free Energy = -4569.96917714*

P 0.5587990 2.0778730 -0.2773490

P -1.3276620 -1.6611730 -0.2202260

Cu 0.6959220 -0.2104770 0.4451660

N 2.2804550 -1.5471300 -1.3011960

C 3.4312260 -1.8444650 -1.9010500

C 3.9380480 -0.9300600 0.0614280

C 4.5122660 -1.4723580 -1.0825480

H 5.5640840 -1.5788950 -1.3053470

N 2.5835690 -0.9632220 -0.1114350

C 1.5108640 -1.6275530 1.6137360

C 0.9708180 -0.7737350 2.4521550

C 1.8694020 -2.9527720 1.7352030

H 2.3268160 -3.5434900 0.9490440

C 0.6898170 -1.2919000 3.7260700

H 0.2204040 -0.6908720 4.5037640

C 1.0311120 -2.6209740 3.9992520

H 0.8539370 -3.0291390 4.9912770

C 1.6011830 -3.4459490 3.0155320

H 1.8527440 -4.4756170 3.2531100

C -2.9513400 -0.9995500 -0.7992240

C -3.2743170 0.3302570 -0.5289580

C -3.9334520 -1.7652670 -1.4410600

C -4.5198700 0.8946620 -0.8198170

C -5.1665130 -1.2225050 -1.7832000

H -3.7337520 -2.8020390 -1.6902530

C -5.4621400 0.1003910 -1.4653200

H -5.9043250 -1.8352970 -2.2909070

H -6.4331970 0.5100800 -1.7230050

C -1.0013620 2.9805950 -0.6586580

C -2.2530270 2.4101680 -0.4261690

C -0.9867430 4.2666800 -1.2199970

C -3.4563530 3.0743210 -0.6990760

C -2.1617220 4.9453800 -1.5111100

H -0.0385070 4.7407040 -1.4482960

C -3.3930160 4.3498800 -1.2474380

H -2.1206840 5.9368960 -1.9499530

H -4.3073660 4.8843400 -1.4829400

O -2.3063900 1.1218150 0.0584770

C -4.7430680 2.3309590 -0.3652450

C 1.3481280 3.1477340 1.0183480

C 1.6187850 4.6201440 0.6940760

C 0.5660280 3.0239730 2.3350570

H 2.3167630 2.6575680 1.1710990

C 2.4256820 5.2628440 1.8282990

H 0.6652070 5.1546220 0.5985340

H 2.1507440 4.7244700 -0.2607800

C 1.3350810 3.6922910 3.4788110

H -0.4163760 3.5047650 2.2141230

H 0.3903330 1.9666680 2.5661890

C 1.6752110 5.1495380 3.1575520

H 2.6333420 6.3129470 1.5944810

H 3.3969550 4.7549030 1.9121750

H 0.7554050 3.6313770 4.4064580

H 2.2651230 3.1313310 3.6479800

H 2.2664040 5.5904980 3.9676660

H 0.7443480 5.7300720 3.0903340

C 1.5202280 2.3460820 -1.8417630

C 3.0233560 2.1197780 -1.6340780

C 0.9693440 1.3833130 -2.9076630

H 1.3705950 3.3781510 -2.1895770

C 3.7836480 2.2576560 -2.9566050

H 3.1872200 1.1132480 -1.2294430

H 3.4207870 2.8346660 -0.9019430

C 1.7304000 1.5306010 -4.2273640

H 1.0902180 0.3533440 -2.5418810

H -0.1045410 1.5569450 -3.0553610

C 3.2283220 1.3021100 -4.0135360

H 4.8480460 2.0599440 -2.7871250

H 3.7019260 3.2926100 -3.3192860

H 1.3368560 0.8195320 -4.9624230

H 1.5671210 2.5376190 -4.6374070

H 3.7733150 1.4170070 -4.9572350

H 3.3849510 0.2721100 -3.6666110

C -1.8643040 -2.4086790 1.4151920

C -2.4686030 -1.3193190 2.3187040

C -2.8168420 -3.6055300 1.3158530

H -0.9250320 -2.7429030 1.8814390

C -2.8054590 -1.8754560 3.7052850

H -3.3931920 -0.9432640 1.8567790

H -1.7804270 -0.4695790 2.4035300

C -3.1450460 -4.1575740 2.7077850

H -3.7480570 -3.2888330 0.8239970

H -2.3821760 -4.4024720 0.7021250

C -3.7469070 -3.0764830 3.6061340

H -3.2514530 -1.0873750 4.3229200

H -1.8764410 -2.1866330 4.2005200

H -3.8278230 -5.0103120 2.6200570

H -2.2193450 -4.5330140 3.1666560

H -3.9576000 -3.4815270 4.6022590

H -4.7081000 -2.7514050 3.1833770

C -1.1119070 -3.1270690 -1.3342650

C -0.8049530 -2.6616090 -2.7651030

C 0.0054080 -4.0562580 -0.8419360

H -2.0430240 -3.7101990 -1.3436820

C -0.6768730 -3.8655570 -3.7037940

H 0.1385740 -2.0992090 -2.7403470

H -1.5861830 -1.9815080 -3.1267300

C 0.1067400 -5.2798270 -1.7574590

H 0.9483790 -3.4974500 -0.8680440

H -0.1664850 -4.3680670 0.1960430

C 0.3770540 -4.8571990 -3.2032770

H -0.4279300 -3.5271210 -4.7161600

H -1.6497070 -4.3742290 -3.7706100

H 0.8998780 -5.9486090 -1.4044510

H -0.8334100 -5.8489260 -1.7101290

H 0.4145070 -5.7347370 -3.8586730

H 1.3640910 -4.3798390 -3.2483960

C -4.9374790 2.3352940 1.1682590

H -5.0554350 3.3627960 1.5277080

H -5.8337260 1.7641210 1.4315840

H -4.0793610 1.8862650 1.6763290

C -5.9682770 2.9645750 -1.0207070

H -6.8716900 2.4092020 -0.7531670

H -6.1064540 3.9884540 -0.6616400

H -5.8797230 2.9843660 -2.1117220

C 4.6762800 -0.3901370 1.2771020

C 4.0592760 0.9206550 1.7750450

H 3.0081740 0.7863610 2.0507080

H 4.6004040 1.2734610 2.6617780

H 4.1344710 1.6941490 1.0032950

C 4.6929760 -1.4024490 2.4388110

H 4.9786500 -2.3985970 2.0845390

H 5.4260480 -1.0814020 3.1885600

H 3.7205900 -1.4752990 2.9313000

C 6.1325590 -0.1100750 0.8747380

H 6.6608540 -1.0349370 0.6212940

H 6.1803370 0.5617880 0.0109530

H 6.6629370 0.3597580 1.7099140

C 3.4560060 -2.4755270 -3.2599270

H 3.6491960 -3.5530260 -3.2027620

H 2.4928920 -2.3283800 -3.7588220

H 4.2380060 -2.0359300 -3.8868620

132

**TS-MINβ-3t**

*Thermal Free Energy Correction = 1.089284*

*Electronic Energy = -4571.06631438*

*Corrected Free Energy = -4569.97703038*

P -0.7883920 2.1514840 -0.1095990

P -0.1445890 -2.0085890 -0.1929460

Cu 0.4437930 0.2719620 0.7184710

N 3.1913260 0.2135460 -0.2502730

C 4.3784520 0.8204080 -0.2393490

C 3.1830010 1.7142710 1.3934460

C 4.4251410 1.7870140 0.7892630

H 5.2399270 2.4449670 1.0569810

N 2.4451270 0.7843520 0.7273410

C 1.6022620 -0.4163290 2.2389570

C 0.4552460 -0.0858640 2.7890460

C 2.6348090 -1.2343710 2.6415570

H 3.5453290 -1.4004950 2.0741700

C 0.2004410 -0.7065990 4.0220810

H -0.7272030 -0.5400940 4.5692030

C 1.1703880 -1.5571810 4.5629180

H 1.0008780 -2.0206470 5.5317160

C 2.3682990 -1.8256690 3.8807810

H 3.1042770 -2.4914770 4.3223700

C -1.6414090 -2.3652540 -1.2121910

C -2.7012390 -1.4574290 -1.2163880

C -1.8132850 -3.5355190 -1.9634460

C -3.9037130 -1.6845960 -1.8930320

C -2.9822030 -3.7747480 -2.6757050

H -1.0170040 -4.2709140 -2.0077840

C -4.0261610 -2.8547060 -2.6354920

H -3.0832570 -4.6840440 -3.2592780

H -4.9388670 -3.0548640 -3.1868480

C -2.3522540 2.0301290 -1.0754630

C -3.0715550 0.8350850 -1.1342380

C -2.8958460 3.1293250 -1.7564020

C -4.2944420 0.7137260 -1.8068250

C -4.0922590 3.0327210 -2.4536360

H -2.3723090 4.0793360 -1.7457430

C -4.7900730 1.8276380 -2.4746530

H -4.4847670 3.8970500 -2.9791940

H -5.7266310 1.7611640 -3.0182690

O -2.5444830 -0.2775460 -0.5158090

C -4.9947050 -0.6361130 -1.7236820

C -1.3156670 3.2019900 1.3321610

C -1.9220110 4.5754150 1.0260710

C -2.2695440 2.3892010 2.2224420

H -0.3820240 3.3499650 1.8966760

C -2.1925560 5.3393510 2.3274970

H -2.8738050 4.4355180 0.4974020

H -1.2689950 5.1609460 0.3665560

C -2.5722220 3.1445930 3.5195860

H -3.2054060 2.2135410 1.6705640

H -1.8278520 1.4117210 2.4461830

C -3.1275260 4.5435170 3.2415480

H -2.6228090 6.3217340 2.1031710

H -1.2402860 5.5189490 2.8456100

H -3.2767750 2.5700560 4.1310760

H -1.6436780 3.2293230 4.1011810

H -3.2916400 5.0829400 4.1808630

H -4.1073760 4.4501190 2.7526320

C 0.2677520 3.2141480 -1.2084720

C 1.3473960 3.9626660 -0.4163660

C 0.9084720 2.2860640 -2.2570060

H -0.3542170 3.9557980 -1.7274940

C 2.2873810 4.7267020 -1.3539320

H 1.9410710 3.2360530 0.1462380

H 0.8945200 4.6502620 0.3083110

C 1.8511030 3.0546770 -3.1849200

H 1.4884200 1.5117610 -1.7333180

H 0.1259470 1.7738390 -2.8321610

C 2.9252200 3.7813950 -2.3731860

H 3.0615310 5.2293800 -0.7636260

H 1.7252150 5.5108440 -1.8815750

H 2.3118230 2.3605220 -3.8968470

H 1.2795200 3.7859350 -3.7743700

H 3.6030560 4.3316230 -3.0357190

H 3.5269970 3.0382310 -1.8295270

C -0.5440310 -3.0047130 1.3430310

C -1.8724850 -2.5198220 1.9494570

C -0.5656930 -4.5261400 1.1588340

H 0.2590300 -2.7453660 2.0499060

C -2.1670210 -3.2329250 3.2722080

H -2.6876580 -2.7340410 1.2427480

H -1.8487970 -1.4331250 2.0959360

C -0.8587870 -5.2312570 2.4878580

H -1.3441860 -4.7930160 0.4293280

H 0.3894540 -4.8854550 0.7594970

C -2.1793150 -4.7515440 3.0915430

H -3.1251320 -2.8861220 3.6761420

H -1.3923390 -2.9636880 4.0020990

H -0.8744310 -6.3168930 2.3391290

H -0.0417050 -5.0149810 3.1905870

H -2.3642270 -5.2498830 4.0496910

H -3.0042740 -5.0313690 2.4211660

C 1.1409210 -3.0162720 -1.0647610

C 1.4578690 -2.4043550 -2.4361810

C 2.4341720 -3.1322420 -0.2468650

H 0.7540150 -4.0333160 -1.2158690

C 2.4392950 -3.3017590 -3.1966160

H 1.8960550 -1.4092130 -2.2714420

H 0.5418220 -2.2664400 -3.0233850

C 3.4211080 -4.0509580 -0.9766440

H 2.8642540 -2.1278350 -0.1384540

H 2.2338900 -3.5163440 0.7617890

C 3.7187750 -3.5476360 -2.3925800

H 2.6852740 -2.8545950 -4.1664850

H 1.9487730 -4.2634800 -3.4065160

H 4.3531240 -4.1313070 -0.4046250

H 2.9959890 -5.0640780 -1.0309040

H 4.3649090 -4.2597180 -2.9185920

H 4.2772350 -2.6065830 -2.3246960

C -5.6044000 -0.7880440 -0.3110460

H -6.3620940 -0.0151130 -0.1454900

H -6.0754460 -1.7714690 -0.2120430

H -4.8365180 -0.6927190 0.4621710

C -6.1067770 -0.7803050 -2.7604770

H -6.5933870 -1.7548420 -2.6628510

H -6.8789300 -0.0226020 -2.5995790

H -5.7245540 -0.6803860 -3.7814760

C 2.6647700 2.4580810 2.5839180

H 3.2332610 3.3808540 2.7274870

H 1.6078910 2.7151200 2.4691280

H 2.7483760 1.8536780 3.4946090

C 5.4633320 0.4060800 -1.2092900

C 4.8674730 0.2354600 -2.6128860

H 5.6229910 -0.1519050 -3.3068590

H 4.0184080 -0.4527730 -2.5914960

H 4.5077550 1.1967470 -2.9978720

C 6.5703490 1.4631480 -1.2543530

H 7.0463760 1.5814290 -0.2750450

H 7.3449340 1.1691240 -1.9713660

H 6.1710450 2.4364640 -1.5607120

C 6.0569040 -0.9278350 -0.7257400

H 5.2709710 -1.6841360 -0.6301500

H 6.8157460 -1.2968480 -1.4264910

H 6.5249590 -0.8037720 0.2571080

46

**Cu-Nα-4q**

*Thermal Free Energy Correction = 0.326447*

*Electronic Energy = -2634.12639855*

*Corrected Free Energy = -2633.79995155*

C 2.5734510 -3.3788810 0.3370970

C 3.7586820 -2.6822130 0.2763260

C 3.7306640 -1.2762240 0.1699770

C 2.4675990 -0.6599740 0.1309580

C 1.3608210 -2.6670800 0.2965820

C 4.9143560 -0.4623760 0.1037980

C 2.3773640 0.7790770 0.0170950

C 3.5531030 1.5478230 -0.0417730

C 4.8296640 0.8880710 0.0048410

C 3.3998620 2.9464780 -0.1452190

H 4.2812420 3.5802610 -0.1915440

C 2.1348550 3.4871030 -0.1846290

C 1.0228220 2.6252950 -0.1237910

H 5.8812320 -0.9558100 0.1377670

H 2.5568700 -4.4593800 0.4198850

H 4.7140920 -3.1985630 0.3099550

H 0.4065020 -3.1822350 0.3495690

H 5.7277410 1.4970970 -0.0415500

H 1.9810380 4.5572820 -0.2614620

H 0.0077680 3.0123540 -0.1531420

Cu -0.3479870 -0.1799590 0.2328450

N 1.3041850 -1.3491220 0.1980150

N 1.1381340 1.3136070 -0.0287560

N -2.1997780 -0.0292910 0.6002610

C -3.2495840 -0.0522260 -0.2495240

C -3.9626150 0.2565600 1.8132010

C -4.4142620 0.1274280 0.4850680

H -5.4327900 0.1592790 0.1231310

N -2.6333020 0.1616030 1.8680620

C -4.7616500 0.4701350 3.0628660

H -5.4667930 -0.3495540 3.2411990

H -4.0835040 0.5300290 3.9178750

H -5.3446360 1.3971460 3.0209880

C -3.0195260 -0.2396280 -1.7326540

C -2.1449760 0.9109000 -2.2555780

H -1.1963250 0.9175730 -1.7055730

H -1.9292250 0.7970240 -3.3248690

H -2.6355000 1.8762600 -2.0927120

C -4.3519580 -0.2566000 -2.4812540

H -4.1889120 -0.3943840 -3.5564520

H -4.9876070 -1.0721920 -2.1209700

H -4.8918180 0.6844470 -2.3323080

C -2.2737230 -1.5620170 -1.9683280

H -2.8597160 -2.4102650 -1.6002080

H -2.0543640 -1.7139620 -3.0320680

H -1.3280480 -1.5410730 -1.4134430

46

**Cu-Nβ-4q**

*Thermal Free Energy Correction = 0.326050*

*Electronic Energy = -2634.12487068*

*Corrected Free Energy = -2633.79882068*

C -4.2264680 -2.5645000 0.0755210

C -4.9581100 -1.4005290 0.0194430

C -4.2869040 -0.1614670 -0.0095950

C -2.8803460 -0.1842650 0.0235590

C -2.8240710 -2.4866770 0.0998000

C -4.9713030 1.1014540 -0.0722990

C -2.1452480 1.0617310 -0.0020290

C -2.8446750 2.2796070 -0.0664760

C -4.2810440 2.2691020 -0.1012130

C -2.0694060 3.4592130 -0.0920400

H -2.5663360 4.4244730 -0.1420410

C -0.6973870 3.3672930 -0.0532800

C -0.0924050 2.0941950 0.0137540

H -6.0569870 1.0969000 -0.0975330

H -4.7079740 -3.5351060 0.0987560

H -6.0442200 -1.4219690 -0.0035750

H -2.2184860 -3.3857250 0.1384640

H -4.8043740 3.2197510 -0.1504930

H -0.0746630 4.2546180 -0.0719270

H 0.9851480 1.9406860 0.0465160

Cu -0.2251850 -1.1026200 0.0842890

N -2.1633800 -1.3379350 0.0741700

N -0.8004220 0.9798330 0.0392500

N 1.6342360 -1.1846950 -0.0314160

C 2.5517240 -2.1674740 -0.1452850

C 3.5695760 -0.2135400 -0.0102100

C 3.8157400 -1.5934220 -0.1398560

H 4.7665060 -2.1015200 -0.2196800

N 2.2578590 0.0173420 0.0535950

C 4.5519290 0.9377810 0.0438150

C 4.3428660 1.7279360 1.3434730

H 5.0299710 2.5818010 1.3947740

H 3.3152350 2.0989550 1.4031680

H 4.5183660 1.0886010 2.2150070

C 4.3162350 1.8665060 -1.1563740

H 5.0084980 2.7175010 -1.1332400

H 4.4632670 1.3250080 -2.0967540

H 3.2907150 2.2486020 -1.1475910

C 5.9880290 0.4101290 -0.0018710

H 6.1858730 -0.2590260 0.8424500

H 6.1715770 -0.1465210 -0.9272630

H 6.7019120 1.2405130 0.0443720

C 2.1401900 -3.6029760 -0.2357910

H 1.0970000 -3.6682220 -0.5644530

H 2.7594600 -4.1515200 -0.9515220

H 2.2182990 -4.1142150 0.7307000

56

**TS-Nα-4q**

*Thermal Free Energy Correction = 0.399787*

*Electronic Energy = -2865.00938805*

*Corrected Free Energy = -2864.60960105*

C 4.5104410 1.9343580 1.1741500

C 5.1789680 0.9042890 0.5508690

C 4.4415590 -0.1285250 -0.0618010

C 3.0376640 -0.0367770 -0.0099400

C 3.1048620 1.9199550 1.1937000

C 5.0505860 -1.2620780 -0.7050740

C 2.2347820 -1.0684700 -0.6286850

C 2.8583040 -2.1872850 -1.2101530

C 4.2943370 -2.2528690 -1.2413220

C 2.0131910 -3.1889170 -1.7317540

H 2.4497900 -4.0729450 -2.1887780

C 0.6467220 -3.0379020 -1.6426710

C 0.1219930 -1.8661610 -1.0636390

H 6.1350260 -1.3143370 -0.7360630

H 5.0455090 2.7438230 1.6572690

H 6.2649430 0.8737670 0.5291250

H 2.5429090 2.7058070 1.6905700

H 4.7625080 -3.1149070 -1.7079600

H -0.0282470 -3.7987120 -2.0177760

H -0.9503880 -1.6985040 -0.9696360

Cu 0.2983570 0.8363630 0.4927640

N 2.3866690 0.9649700 0.6278400

N 0.8981270 -0.9044070 -0.5974030

C -0.4554230 2.5881420 0.0782680

C -1.4879700 1.9781320 -0.4032290

C -0.2539720 3.9208590 -0.2995810

C -2.4901930 2.4060730 -1.2409190

C -1.2200530 4.4931960 -1.1307940

H 0.6007170 4.5077370 0.0292390

C -2.3123550 3.7484010 -1.5999330

H -3.3200370 1.8093250 -1.5975650

H -1.1267850 5.5352590 -1.4243380

H -3.0423820 4.2204540 -2.2516560

N -1.1805300 -0.2308610 1.3850650

C -1.3391650 -1.4225400 1.9765390

C -3.0658770 -1.0532680 0.6446720

C -2.5365610 -1.9941390 1.5398130

H -2.9677380 -2.9370340 1.8479290

N -2.2256450 -0.0045620 0.5683220

C -4.3520340 -1.0964450 -0.1495730

C -4.0222210 -1.1369930 -1.6499870

H -4.9361310 -1.0983970 -2.2550490

H -3.3780960 -0.2987770 -1.9319360

H -3.4899320 -2.0633430 -1.8977900

C -5.1939940 0.1469890 0.1710200

H -6.1075080 0.1645870 -0.4357510

H -5.4805900 0.1478650 1.2276900

H -4.6259830 1.0624550 -0.0139300

C -5.1532870 -2.3497680 0.2136840

H -4.5845380 -3.2591900 -0.0093150

H -5.4049840 -2.3578120 1.2792910

H -6.0865940 -2.3826110 -0.3596760

C -0.2861030 -1.9702070 2.8890590

H 0.2278030 -1.1549910 3.4075270

H -0.7176540 -2.6372490 3.6405030

H 0.4704760 -2.5410930 2.3348520

56

**TS-Nβ-4q**

*Thermal Free Energy Correction = 0.398857*

*Electronic Energy = -2865.01146681*

*Corrected Free Energy = -2864.61260981*

C -2.9461290 0.7807940 3.0748740

C -4.0150970 0.6683620 2.2152030

C -3.8030490 0.1990730 0.9031480

C -2.4828390 -0.1309060 0.5402520

C -1.6656430 0.4233770 2.6166470

C -4.8605750 0.0476800 -0.0590160

C -2.2106700 -0.6166760 -0.7963190

C -3.2699290 -0.7538320 -1.7137800

C -4.6057740 -0.4085560 -1.3104270

C -2.9488620 -1.2302550 -3.0014480

H -3.7371000 -1.3490770 -3.7399630

C -1.6417660 -1.5379730 -3.3027480

C -0.6573340 -1.3633910 -2.3117210

H -5.8713140 0.3084500 0.2412330

H -3.0729880 1.1375020 4.0904900

H -5.0195630 0.9351800 2.5323780

H -0.7968890 0.4947920 3.2652280

H -5.4084900 -0.5210080 -2.0335110

H -1.3604330 -1.9070650 -4.2823670

H 0.3859960 -1.5967630 -2.5093090

Cu 0.4448590 -0.4925380 0.5734110

N -1.4388900 -0.0161440 1.3911970

N -0.9306150 -0.9166790 -1.1008820

C 1.2723500 -2.1163010 1.3284890

C 2.1265440 -1.7119740 0.4290810

C 1.1943710 -3.4981380 1.5544100

C 3.0161140 -2.4198900 -0.3561600

C 2.0719350 -4.3210550 0.8469270

H 0.4942090 -3.9382760 2.2612870

C 2.9592530 -3.7923200 -0.1061800

H 3.6821490 -1.9728350 -1.0860030

H 2.0710290 -5.3926280 1.0291280

H 3.6168160 -4.4604590 -0.6557760

N 1.6965970 1.0273310 0.2461250

C 1.9247140 2.2475560 -0.2646690

C 3.8307470 1.1133510 -0.2445830

C 3.2784480 2.3556040 -0.5910130

H 3.7983040 3.2132060 -0.9954150

N 2.8668970 0.3432590 0.2692970

C 5.2405650 0.6190120 -0.3531340

H 5.9471120 1.3280010 0.0894370

H 5.3386050 -0.3336380 0.1744170

H 5.5398380 0.4673760 -1.3964160

C 0.8061840 3.2582350 -0.3874080

C -0.3383420 2.6665390 -1.2231290

H -0.7414260 1.7736900 -0.7349590

H -1.1503060 3.3949370 -1.3385150

H 0.0152610 2.3764930 -2.2186320

C 1.3223910 4.5318070 -1.0607130

H 0.5151290 5.2666400 -1.1564750

H 2.1282470 4.9848050 -0.4736530

H 1.7107670 4.3151820 -2.0616250

C 0.2740210 3.5987840 1.0129140

H 1.0691940 4.0202050 1.6363210

H -0.5443450 4.3268020 0.9510580

H -0.0983830 2.6943000 1.5055740

56

**TS-Nα-4qB3LYP**

*Thermal Free Energy Correction = 0.396380*

*Electronic Energy = -2865.67675617*

*Corrected Free Energy = -2865.28037617*

C 4.4058630 1.8543250 1.3467700

C 5.1104190 0.8446600 0.7126360

C 4.4016850 -0.1684320 0.0331170

C 2.9891040 -0.0803930 0.0299270

C 3.0023620 1.8405800 1.3151980

C 5.0269350 -1.2823250 -0.6265340

C 2.2128230 -1.0761330 -0.6567010

C 2.8511100 -2.1850620 -1.2610680

C 4.2856060 -2.2550040 -1.2317410

C 2.0155350 -3.1516580 -1.8615190

H 2.4572730 -4.0226090 -2.3388360

C 0.6414480 -2.9803260 -1.8263310

C 0.1038360 -1.8293910 -1.2216990

H 6.1119620 -1.3429660 -0.6185110

H 4.9199000 2.6463470 1.8815170

H 6.1966110 0.8203580 0.7369210

H 2.4147920 2.6028420 1.8168510

H 4.7735480 -3.1005030 -1.7095620

H -0.0251570 -3.7135020 -2.2685980

H -0.9661820 -1.6480160 -1.1673740

Cu 0.3151900 0.7801020 0.4537640

N 2.3015570 0.8984100 0.6839730

N 0.8713660 -0.8914610 -0.6758570

C -0.3474110 2.5206520 0.0151050

C -1.4041810 1.9609740 -0.5001700

C -0.0757880 3.8518650 -0.3316770

C -2.3680500 2.4571810 -1.3441400

C -1.0065640 4.4887320 -1.1666530

H 0.8057980 4.3858480 0.0190910

C -2.1260220 3.8052870 -1.6705750

H -3.2170900 1.9051540 -1.7291020

H -0.8610140 5.5333860 -1.4333270

H -2.8267660 4.3260310 -2.3196200

N -1.1679310 -0.1987540 1.3270300

C -1.3259510 -1.3733430 1.9714740

C -3.1098460 -1.0092860 0.6921680

C -2.5544440 -1.9296880 1.6022630

H -2.9894460 -2.8523420 1.9628230

N -2.2549710 0.0226010 0.5446860

C -4.4246800 -1.0534240 -0.0630410

C -4.1368320 -1.1632840 -1.5775850

H -5.0689150 -1.1627390 -2.1577090

H -3.5158130 -0.3288010 -1.9176180

H -3.5989680 -2.0934050 -1.8016810

C -5.2276740 0.2349530 0.2177280

H -6.1652280 0.2420550 -0.3536530

H -5.4741220 0.3095810 1.2829700

H -4.6469150 1.1226970 -0.0480440

C -5.2537960 -2.2724950 0.3772160

H -4.7203960 -3.2092960 0.1769510

H -5.4747350 -2.2321000 1.4498010

H -6.2061100 -2.3031050 -0.1659700

C -0.2541950 -1.9103340 2.8699890

H 0.6324870 -2.2207830 2.2984570

H 0.0765060 -1.1533320 3.5914030

H -0.6104150 -2.7810900 3.4298720

56

**TS-Nβ-4qB3LYP**

*Thermal Free Energy Correction = 0.395344*

*Electronic Energy = -2865.68020910*

*Corrected Free Energy = -2865.28486510*

C 3.3195980 -1.2628670 -2.6179230

C 4.2813880 -0.9001060 -1.6905110

C 3.8765890 -0.4728210 -0.4081930

C 2.4869970 -0.4521700 -0.1403980

C 1.9619340 -1.1882910 -2.2677430

C 4.7863490 -0.0428150 0.6181840

C 2.0137810 -0.0235420 1.1479110

C 2.9291170 0.4316050 2.1263830

C 4.3333790 0.4003930 1.8264320

C 2.3839110 0.8936750 3.3438280

H 3.0458030 1.2546720 4.1267900

C 1.0103120 0.8900350 3.5197900

C 0.1852050 0.4017640 2.4900540

H 5.8516310 -0.0639180 0.4043580

H 3.5966630 -1.5910810 -3.6143770

H 5.3388080 -0.9347020 -1.9388160

H 1.1783990 -1.4498140 -2.9716970

H 5.0336840 0.7382290 2.5857940

H 0.5634340 1.2508360 4.4404970

H -0.8983630 0.3835540 2.5728240

Cu -0.3361270 -0.6554540 -0.3931830

N 1.5456520 -0.7901520 -1.0660850

N 0.6745760 -0.0598790 1.3455230

C -1.2720660 -2.3013710 -0.7228830

C -2.1163090 -1.8958040 0.1833200

C -1.2515490 -3.6712250 -1.0256680

C -3.0570230 -2.5787830 0.9165220

C -2.1883800 -4.4794950 -0.3640190

H -0.5555320 -4.1075190 -1.7400050

C -3.0686590 -3.9484330 0.5951980

H -3.7166150 -2.1344410 1.6534530

H -2.2380510 -5.5415690 -0.5951200

H -3.7799420 -4.6040000 1.0930510

N -1.6595460 0.8087760 -0.4208160

C -1.8088220 2.1356970 -0.6189450

C -3.5292290 1.3797730 0.5758380

C -2.9951150 2.5470790 0.0008830

H -3.4289440 3.5382130 0.0115350

N -2.7055840 0.3495910 0.3119390

C -0.7705580 2.9280020 -1.3906450

C -0.4839400 2.2321530 -2.7391140

H -1.3923010 2.1754240 -3.3489740

H 0.2812660 2.7803520 -3.3044030

H -0.1287130 1.2096510 -2.5742000

C 0.5408410 2.9921570 -0.5752490

H 1.3027790 3.5809420 -1.1030760

H 0.3689870 3.4493600 0.4061430

H 0.9366680 1.9861380 -0.4128110

C -1.2759400 4.3572840 -1.6489510

H -2.2135130 4.3461350 -2.2160050

H -1.4567250 4.8889170 -0.7074760

H -0.5353470 4.9281010 -2.2224310

C -4.7927840 1.1884780 1.3599450

H -5.6535080 1.6396530 0.8513850

H -4.9992390 0.1208230 1.4894760

H -4.7334810 1.6436280 2.3581650

56

**TS-Nα-4qB97D**

*Thermal Free Energy Correction = 0.379519*

*Electronic Energy = -2865.40468395*

*Corrected Free Energy = -2865.02516495*

C 4.5174950 1.8320500 1.2490660

C 5.1583320 0.7218510 0.6996720

C 4.3877530 -0.2685710 0.0356860

C 2.9761430 -0.0529530 -0.0496730

C 3.1119940 1.9386580 1.1453090

C 4.9485280 -1.4758740 -0.5192880

C 2.1436450 -1.0303030 -0.7192280

C 2.7222640 -2.2434210 -1.2073660

C 4.1467360 -2.4321430 -1.1007170

C 1.8312650 -3.1969890 -1.7701020

H 2.2277810 -4.1447290 -2.1569420

C 0.4650470 -2.9197460 -1.8078150

C -0.0017200 -1.6721440 -1.3253410

H 6.0330410 -1.6268780 -0.4468380

H 5.0821650 2.6125360 1.7722830

H 6.2457980 0.5978980 0.7810360

H 2.5720750 2.7865380 1.5878740

H 4.5832630 -3.3590360 -1.4945570

H -0.2503820 -3.6448770 -2.2128560

H -1.0690060 -1.4122690 -1.3294330

Cu 0.2771330 1.0229790 0.3575590

N 2.3594330 1.0249230 0.5215510

N 0.8223990 -0.7492640 -0.8295560

C -0.4350160 2.7719630 -0.1230250

C -1.5970030 2.2305570 -0.3871110

C -0.2213570 4.1214010 -0.4735220

C -2.7324980 2.7527570 -0.9735490

C -1.3213310 4.7842010 -1.0682380

H 0.7285100 4.6513230 -0.3102540

C -2.5437040 4.1197790 -1.3153790

H -3.6679200 2.2168340 -1.1570960

H -1.2254250 5.8430510 -1.3459400

H -3.3760320 4.6691120 -1.7775120

N -1.0906370 -0.1484800 1.2949190

C -0.9531020 -1.4222730 1.7440020

C -2.9109640 -1.2122490 0.6895290

C -2.1005890 -2.1483960 1.3842830

H -2.3335680 -3.1919030 1.6160110

N -2.2754570 -0.0206110 0.6541530

C -4.2939630 -1.4477410 0.1026860

C -4.7931880 -0.2067410 -0.6618280

H -5.8055780 -0.3949330 -1.0695680

H -4.8330080 0.6701840 0.0089110

H -4.1127570 0.0356170 -1.4990030

C -5.2857840 -1.7690340 1.2486560

H -6.2995300 -1.9630390 0.8429300

H -4.9577630 -2.6626480 1.8127140

H -5.3455760 -0.9200420 1.9558050

C -4.2384570 -2.6523290 -0.8686600

H -3.5463010 -2.4445820 -1.7084000

H -3.8862790 -3.5637770 -0.3494120

H -5.2429470 -2.8587330 -1.2898730

C 0.3138750 -1.8568090 2.4240730

H 0.1337890 -2.2396730 3.4491490

H 0.8245280 -2.6638000 1.8585670

H 1.0077020 -0.9975470 2.4930140

56

**TS-Nβ-4qB97D**

*Thermal Free Energy Correction = 0.379270*

*Electronic Energy = -2865.41203447*

*Corrected Free Energy = -2865.03276447*

C 3.2933360 -0.5437550 -2.8695730

C 4.2709310 -0.3886370 -1.8884010

C 3.8802720 -0.2933920 -0.5267860

C 2.4818760 -0.3728170 -0.2366560

C 1.9342840 -0.5956580 -2.4857970

C 4.8156230 -0.1083980 0.5550710

C 2.0333000 -0.2754620 1.1382900

C 2.9851330 -0.0636840 2.1844820

C 4.3862540 0.0089880 1.8570890

C 2.4706850 0.0684080 3.5023440

H 3.1631200 0.2322040 4.3382540

C 1.0945140 -0.0025910 3.7131900

C 0.2384330 -0.2229260 2.6047740

H 5.8846200 -0.0520710 0.3136470

H 3.5588560 -0.6170350 -3.9305620

H 5.3349320 -0.3337520 -2.1517120

H 1.1386290 -0.7044630 -3.2345140

H 5.1076810 0.1623150 2.6698690

H 0.6694200 0.1069490 4.7179310

H -0.8541380 -0.2772270 2.7180140

Cu -0.4383850 -0.5675230 -0.5335200

N 1.5357390 -0.5100550 -1.2118630

N 0.7016240 -0.3683610 1.3671390

C -1.1707320 -2.3625180 -0.8472980

C -2.1847590 -1.9647370 -0.1239940

C -1.0596000 -3.7241570 -1.1893060

C -3.2502920 -2.6690500 0.4028850

C -2.1036870 -4.5560840 -0.7169810

H -0.2331390 -4.1427930 -1.7820650

C -3.1685610 -4.0460570 0.0614630

H -4.0617900 -2.2433090 1.0027610

H -2.0895140 -5.6275850 -0.9609850

H -3.9576060 -4.7273720 0.4098070

N -1.7307970 0.9274770 -0.2717950

C -1.7942910 2.2814790 -0.3280740

C -3.6408780 1.4862550 0.6516090

C -3.0079030 2.6903830 0.2546950

H -3.3900660 3.7092010 0.3559250

N -2.8490370 0.4450940 0.3240490

C -4.9743300 1.2835090 1.3178910

H -4.9872330 1.6853810 2.3527480

H -5.7890040 1.7913450 0.7631280

H -5.2130510 0.2045340 1.3680820

C -0.6631820 3.0949600 -0.9386420

C 0.6175230 2.9184630 -0.0865700

H 0.8914630 1.8520530 -0.0430880

H 1.4630480 3.4869350 -0.5247350

H 0.4496350 3.2734070 0.9483630

C -1.0421910 4.5875980 -0.9844330

H -0.2199790 5.1779350 -1.4345380

H -1.9565170 4.7429970 -1.5878680

H -1.2320590 4.9763880 0.0341380

C -0.3804740 2.5921690 -2.3755830

H -1.2727310 2.7233660 -3.0166690

H 0.4666340 3.1496650 -2.8244570

H -0.1284370 1.5162720 -2.3562440

# X-Ray Crystallography Data


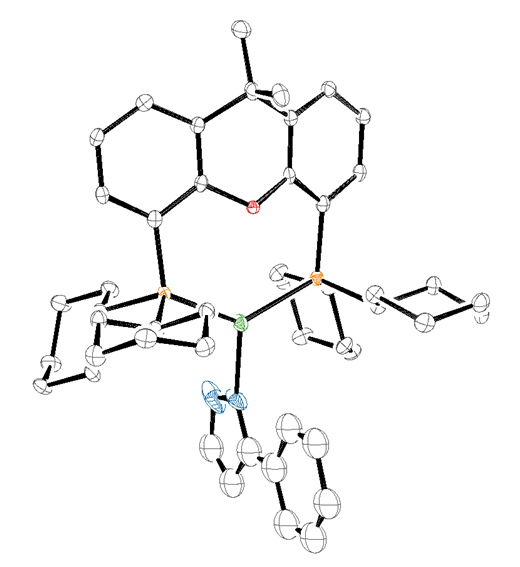


**Figure S6.** **CyXant-Cu-Nα** structure determined by X-ray diffraction

**Experimental summary**

A colorless crystal of approximate dimensions 0.206 x 0.094 x 0.075 mm was mounted in a cryoloop/on a glass fiber and transferred to a Bruker X8 Prospector diffractometer system. The APEX3program package was used to determine the unit-cell parameters and for data collection (10 sec/frame scan time). The raw frame data was processed using SAINT and SADABS to yield the reflection data file. Subsequent calculations were carried out using the SHELXTL program package. The diffraction symmetry was *mmm* and the systematic absences were consistent with the orthorhombic space group *Cmc*21 that was later determined to be correct.

The structure was solved by direct methods and refined on F2 by full-matrix least-squares techniques. The analytical scattering factors for neutral atoms were used throughout the analysis. Hydrogen atoms were located from a difference-Fourier map and refined (x,y,z and Uiso).

Least squares analysis yielded wR2 = 0.0999 and Goof = 1.027 for 238 variables refined against 4050 data (0.82 Å), R1 = 0.0397 for those 3906 data with I > 2.0σ(I). The absolute structure was assigned by refinement of the Flack parameter.82

Definitions:

wR2 = [Σ[w(Fo2-Fc2)2] / Σ[w(Fo2)2] ]1/2

R1 = Σ||Fo|-|Fc|| / Σ|Fo|

Goof = S = [Σ[w(Fo2-Fc2)2] / (n-p)]1/2 where n is the number of reflections and p is the total

number of parameters refined.

The thermal ellipsoid plot is shown at the 50% probability level.

**Table S16. Crystal data and structure refinement.**

Identification code CyXant-Cu-Nα

Empirical formula C48 H63 Cu N2 O P2

Formula weight 809.48

Temperature 100(2) K

Wavelength 1.54178 Å

Crystal system Orthorhombic

Space group Cmc2**1**

Unit cell dimensions a = 14.3615(6) Å a = 90°.

b = 18.6461(9) Å b = 90°.

c = 15.8234(8) Å g = 90°.

Volume 4237.3(3) Å3

Z 4

Density (calculated) 1.269 Mg/m3

Absorption coefficient 1.722 mm-1

F(000) 1728

Crystal color ?

Crystal size 0.206 x 0.094 x 0.075 mm3

Theta range for data collection 3.885 to 68.331°

Index ranges -17 <= *h* <= 17, -22 <= *k* <= 22, -19 <= *l* <= 19

Reflections collected 44717

Independent reflections 4050 [R(int) = 0.0812]

Completeness to theta = 67.679° 100.0 %

Absorption correction Semi-empirical from equivalents

Max. and min. transmission 0.7531 and 0.6791

Refinement method Full-matrix least-squares on F2

Data / restraints / parameters 4050 / 1 / 238

Goodness-of-fit on F2 1.027

Final R indices [I>2sigma(I) = 3906 data] R1 = 0.0397, wR2 = 0.0987

R indices (all data, ? Å) R1 = 0.0425, wR2 = 0.0999

Absolute structure parameter 0.000(8)

Extinction coefficient n/a

Largest diff. peak and hole 0.858 and -0.640 e.Å-3

**Table S17. Atomic coordinates (x 104) and equivalent isotropic displacement parameters (Å2 x 103).**

U(eq) is defined as one third of the trace of the orthogonalized Uij tensor.

________________________________________________________________________________

x y z U(eq)

________________________________________________________________________________

Cu(1) 5000 3121(1) 4824(1) 17(1)

P(1) 3579(1) 2762(1) 4403(1) 13(1)

O(1) 5000 1765(2) 3709(2) 12(1)

N(1) 5000 3918(4) 5662(5) 38(2)

C(11) 2606(3) 2076(2) 3054(2) 14(1)

C(13) 3298(3) 1194(2) 2133(2) 16(1)

C(12) 2533(3) 1603(2) 2378(2) 16(1)

C(28) 1986(3) 1112(2) 6128(3) 21(1)

C(19) 2842(3) 3538(2) 4110(2) 15(1)

C(20) 2606(3) 3992(2) 4893(3) 18(1)

C(15) 4182(3) 1721(2) 3243(2) 13(1)

C(21) 2033(3) 4652(2) 4632(2) 19(1)

C(10) 3436(3) 2148(2) 3506(3) 14(1)

C(29) 3016(3) 1252(2) 6278(3) 21(1)

C(22) 2557(3) 5107(2) 3983(3) 22(1)

C(30) 3468(3) 1602(2) 5505(3) 17(1)

C(27) 1484(3) 1809(2) 5897(3) 21(1)

C(26) 1918(3) 2151(2) 5122(3) 18(1)

C(17) 5000 132(3) 2945(4) 23(1)

N(2) 5000 4542(4) 5217(7) 59(2)

C(23) 2818(3) 4661(2) 3209(3) 23(1)

C(25) 2953(3) 2302(2) 5274(3) 16(1)

C(14) 4141(3) 1248(2) 2556(2) 14(1)

C(24) 3383(3) 3995(2) 3466(3) 19(1)

C(18) 5000 541(4) 1438(4) 27(1)

C(16) 5000 795(3) 2354(4) 18(1)

C(3) 5000 4029(8) 6511(8) 69(1)

C(9) 5000 2745(7) 6911(8) 69(1)

C(1) 5000 5073(8) 5793(7) 69(1)

C(4) 5000 3487(8) 7124(8) 69(1)

C(2) 5000 4805(7) 6585(8) 69(1)

C(8) 5000 2190(7) 7512(7) 69(1)

C(6) 5000 3058(7) 8567(8) 69(1)

C(7) 5000 2407(8) 8382(8) 69(1)

C(5) 5000 3642(7) 7999(7) 69(1)

________________________________________________________________________________ **Table S18. Bond lengths [Å] and angles [°].**

_____________________________________________________

Cu(1)-N(1) 1.992(6)

Cu(1)-P(1) 2.2484(10)

Cu(1)-P(1)#1 2.2484(10)

P(1)-C(10) 1.836(4)

P(1)-C(19) 1.851(4)

P(1)-C(25) 1.856(4)

O(1)-C(15)#1 1.389(4)

O(1)-C(15) 1.389(4)

N(1)-C(3) 1.358(13)

N(1)-N(2) 1.361(12)

C(11)-C(12) 1.389(6)

C(11)-C(10) 1.396(6)

C(11)-H(11) 0.9500

C(13)-C(14) 1.388(6)

C(13)-C(12) 1.394(6)

C(13)-H(13) 0.9500

C(12)-H(12) 0.9500

C(28)-C(29) 1.521(6)

C(28)-C(27) 1.531(6)

C(28)-H(28A) 0.9900

C(28)-H(28B) 0.9900

C(19)-C(24) 1.539(5)

C(19)-C(20) 1.539(5)

C(20)-C(21) 1.536(5)

C(20)-H(20A) 0.9900

C(20)-H(20B) 0.9900

C(15)-C(10) 1.399(6)

C(15)-C(14) 1.401(5)

C(21)-C(22) 1.532(6)

C(21)-H(21A) 0.9900

C(21)-H(21B) 0.9900

C(29)-C(30) 1.531(6)

C(29)-H(29A) 0.9900

C(29)-H(29B) 0.9900

C(22)-C(23) 1.527(6)

C(22)-H(22A) 0.9900

C(22)-H(22B) 0.9900

C(30)-C(25) 1.544(5)

C(30)-H(30A) 0.9900

C(30)-H(30B) 0.9900

C(27)-C(26) 1.517(6)

C(27)-H(27A) 0.9900

C(27)-H(27B) 0.9900

C(26)-C(25) 1.531(6)

C(26)-H(26A) 0.9900

C(26)-H(26B) 0.9900

C(17)-C(16) 1.550(8)

C(17)-H(17A) 0.9800

C(17)-H(17B) 0.9800

C(17)-H(17C) 0.9800

N(2)-C(1) 1.345(13)

C(23)-C(24) 1.539(6)

C(23)-H(23A) 0.9900

C(23)-H(23B) 0.9900

C(14)-C(16) 1.529(5)

C(24)-H(24A) 0.9900

C(24)-H(24B) 0.9900

C(18)-C(16) 1.525(9)

C(18)-H(18A) 0.9800

C(18)-H(18B) 0.9800

C(18)-H(18C) 0.9800

C(16)-C(14)#1 1.529(5)

C(3)-C(4) 1.402(19)

C(3)-C(2) 1.452(18)

C(9)-C(8) 1.405(18)

C(9)-C(4) 1.424(18)

C(9)-H(9) 0.9500

C(1)-C(2) 1.349(18)

C(1)-H(1) 0.9500

C(4)-C(5) 1.414(15)

C(2)-H(2) 0.9500

C(8)-C(7) 1.435(15)

C(8)-H(8) 0.9500

C(6)-C(7) 1.248(17)

C(6)-C(5) 1.413(18)

C(6)-H(6) 0.9500

C(7)-H(7) 0.9500

C(5)-H(5) 0.9500

N(1)-Cu(1)-P(1) 114.76(3)

N(1)-Cu(1)-P(1)#1 114.76(3)

P(1)-Cu(1)-P(1)#1 130.41(6)

C(10)-P(1)-C(19) 103.27(18)

C(10)-P(1)-C(25) 103.39(18)

C(19)-P(1)-C(25) 105.71(18)

C(10)-P(1)-Cu(1) 121.05(13)

C(19)-P(1)-Cu(1) 111.15(13)

C(25)-P(1)-Cu(1) 110.95(14)

C(15)#1-O(1)-C(15) 115.5(4)

C(3)-N(1)-N(2) 112.4(8)

C(3)-N(1)-Cu(1) 140.5(8)

N(2)-N(1)-Cu(1) 107.1(6)

C(12)-C(11)-C(10) 121.4(4)

C(12)-C(11)-H(11) 119.3

C(10)-C(11)-H(11) 119.3

C(14)-C(13)-C(12) 120.9(4)

C(14)-C(13)-H(13) 119.6

C(12)-C(13)-H(13) 119.6

C(11)-C(12)-C(13) 120.2(4)

C(11)-C(12)-H(12) 119.9

C(13)-C(12)-H(12) 119.9

C(29)-C(28)-C(27) 110.4(3)

C(29)-C(28)-H(28A) 109.6

C(27)-C(28)-H(28A) 109.6

C(29)-C(28)-H(28B) 109.6

C(27)-C(28)-H(28B) 109.6

H(28A)-C(28)-H(28B) 108.1

C(24)-C(19)-C(20) 109.9(3)

C(24)-C(19)-P(1) 108.1(3)

C(20)-C(19)-P(1) 110.8(3)

C(21)-C(20)-C(19) 110.0(3)

C(21)-C(20)-H(20A) 109.7

C(19)-C(20)-H(20A) 109.7

C(21)-C(20)-H(20B) 109.7

C(19)-C(20)-H(20B) 109.7

H(20A)-C(20)-H(20B) 108.2

O(1)-C(15)-C(10) 117.2(4)

O(1)-C(15)-C(14) 119.0(3)

C(10)-C(15)-C(14) 123.9(3)

C(22)-C(21)-C(20) 111.1(3)

C(22)-C(21)-H(21A) 109.4

C(20)-C(21)-H(21A) 109.4

C(22)-C(21)-H(21B) 109.4

C(20)-C(21)-H(21B) 109.4

H(21A)-C(21)-H(21B) 108.0

C(11)-C(10)-C(15) 116.5(4)

C(11)-C(10)-P(1) 123.5(3)

C(15)-C(10)-P(1) 120.0(3)

C(28)-C(29)-C(30) 111.2(4)

C(28)-C(29)-H(29A) 109.4

C(30)-C(29)-H(29A) 109.4

C(28)-C(29)-H(29B) 109.4

C(30)-C(29)-H(29B) 109.4

H(29A)-C(29)-H(29B) 108.0

C(23)-C(22)-C(21) 110.9(3)

C(23)-C(22)-H(22A) 109.5

C(21)-C(22)-H(22A) 109.5

C(23)-C(22)-H(22B) 109.5

C(21)-C(22)-H(22B) 109.5

H(22A)-C(22)-H(22B) 108.1

C(29)-C(30)-C(25) 110.2(3)

C(29)-C(30)-H(30A) 109.6

C(25)-C(30)-H(30A) 109.6

C(29)-C(30)-H(30B) 109.6

C(25)-C(30)-H(30B) 109.6

H(30A)-C(30)-H(30B) 108.1

C(26)-C(27)-C(28) 110.8(4)

C(26)-C(27)-H(27A) 109.5

C(28)-C(27)-H(27A) 109.5

C(26)-C(27)-H(27B) 109.5

C(28)-C(27)-H(27B) 109.5

H(27A)-C(27)-H(27B) 108.1

C(27)-C(26)-C(25) 110.4(3)

C(27)-C(26)-H(26A) 109.6

C(25)-C(26)-H(26A) 109.6

C(27)-C(26)-H(26B) 109.6

C(25)-C(26)-H(26B) 109.6

H(26A)-C(26)-H(26B) 108.1

C(16)-C(17)-H(17A) 109.5

C(16)-C(17)-H(17B) 109.5

H(17A)-C(17)-H(17B) 109.5

C(16)-C(17)-H(17C) 109.5

H(17A)-C(17)-H(17C) 109.5

H(17B)-C(17)-H(17C) 109.5

C(1)-N(2)-N(1) 106.2(10)

C(22)-C(23)-C(24) 110.9(3)

C(22)-C(23)-H(23A) 109.5

C(24)-C(23)-H(23A) 109.5

C(22)-C(23)-H(23B) 109.5

C(24)-C(23)-H(23B) 109.5

H(23A)-C(23)-H(23B) 108.0

C(26)-C(25)-C(30) 110.3(3)

C(26)-C(25)-P(1) 116.0(3)

C(30)-C(25)-P(1) 109.5(3)

C(13)-C(14)-C(15) 117.2(3)

C(13)-C(14)-C(16) 124.2(4)

C(15)-C(14)-C(16) 118.5(4)

C(19)-C(24)-C(23) 110.8(3)

C(19)-C(24)-H(24A) 109.5

C(23)-C(24)-H(24A) 109.5

C(19)-C(24)-H(24B) 109.5

C(23)-C(24)-H(24B) 109.5

H(24A)-C(24)-H(24B) 108.1

C(16)-C(18)-H(18A) 109.5

C(16)-C(18)-H(18B) 109.5

H(18A)-C(18)-H(18B) 109.5

C(16)-C(18)-H(18C) 109.5

H(18A)-C(18)-H(18C) 109.5

H(18B)-C(18)-H(18C) 109.5

C(18)-C(16)-C(14)#1 111.8(3)

C(18)-C(16)-C(14) 111.8(3)

C(14)#1-C(16)-C(14) 107.5(5)

C(18)-C(16)-C(17) 109.0(5)

C(14)#1-C(16)-C(17) 108.3(3)

C(14)-C(16)-C(17) 108.3(3)

N(1)-C(3)-C(4) 125.1(11)

N(1)-C(3)-C(2) 103.4(12)

C(4)-C(3)-C(2) 131.5(11)

C(8)-C(9)-C(4) 123.7(11)

C(8)-C(9)-H(9) 118.2

C(4)-C(9)-H(9) 118.2

N(2)-C(1)-C(2) 110.9(13)

N(2)-C(1)-H(1) 124.5

C(2)-C(1)-H(1) 124.5

C(3)-C(4)-C(5) 122.0(13)

C(3)-C(4)-C(9) 122.4(11)

C(5)-C(4)-C(9) 115.6(13)

C(1)-C(2)-C(3) 107.1(11)

C(1)-C(2)-H(2) 126.5

C(3)-C(2)-H(2) 126.5

C(9)-C(8)-C(7) 116.2(12)

C(9)-C(8)-H(8) 121.9

C(7)-C(8)-H(8) 121.9

C(7)-C(6)-C(5) 126.9(13)

C(7)-C(6)-H(6) 116.5

C(5)-C(6)-H(6) 116.5

C(6)-C(7)-C(8) 120.0(14)

C(6)-C(7)-H(7) 120.0

C(8)-C(7)-H(7) 120.0

C(6)-C(5)-C(4) 117.7(12)

C(6)-C(5)-H(5) 121.2

C(4)-C(5)-H(5) 121.2

_____________________________________________________________

Symmetry transformations used to generate equivalent atoms:

#1 -x+1,y,z

**Table S19. Anisotropic displacement parameters (Å2 x 103).**

The anisotropic displacement factor exponent takes the form: -2p2[ h2 a*2U11 + ... + 2 h k a* b* U12 ]

______________________________________________________________________________

U11 U22 U33 U23 U13 U12

______________________________________________________________________________

Cu(1) 12(1) 16(1) 23(1) -3(1) 0 0

P(1) 10(1) 13(1) 15(1) 0(1) 1(1) 1(1)

O(1) 9(2) 16(2) 12(2) -3(1) 0 0

N(1) 18(3) 35(4) 60(4) -31(3) 0 0

C(11) 10(2) 16(2) 17(2) 4(2) 1(2) 1(2)

C(13) 16(2) 17(2) 15(2) 2(2) 1(2) -3(2)

C(12) 13(2) 20(2) 15(2) 3(2) -2(2) -1(2)

C(28) 25(2) 20(2) 18(2) 3(2) 4(2) -3(2)

C(19) 16(2) 12(2) 17(2) -1(2) 1(2) 4(2)

C(20) 17(2) 19(2) 17(2) 2(2) 4(2) 5(2)

C(15) 9(2) 15(2) 15(2) 4(2) -1(2) -2(2)

C(21) 23(2) 16(2) 19(2) -2(2) 4(2) 5(2)

C(10) 13(2) 15(2) 14(2) 4(2) 1(2) -1(2)

C(29) 26(2) 19(2) 18(2) 4(2) -2(2) 1(2)

C(22) 32(2) 16(2) 19(2) 2(2) 1(2) 6(2)

C(30) 17(2) 17(2) 17(2) 2(2) -1(2) 2(2)

C(27) 18(2) 23(2) 23(2) 2(2) 5(2) -5(2)

C(26) 14(2) 20(2) 20(2) 2(2) 1(2) 0(2)

C(17) 16(3) 16(3) 38(4) -1(3) 0 0

N(2) 20(3) 37(4) 119(7) -37(4) 0 0

C(23) 32(2) 20(2) 18(2) 2(2) 2(2) 6(2)

C(25) 15(2) 15(2) 16(2) 1(2) 1(2) 2(2)

C(14) 12(2) 14(2) 14(2) 2(1) 0(2) -1(2)

C(24) 22(2) 19(2) 16(2) 3(2) 3(2) 5(2)

C(18) 18(3) 30(3) 32(4) -13(3) 0 0

C(16) 10(3) 21(3) 25(3) -3(2) 0 0

C(3) 18(1) 116(3) 74(2) -35(2) 0 0

C(9) 18(1) 116(3) 74(2) -35(2) 0 0

C(1) 18(1) 116(3) 74(2) -35(2) 0 0

C(4) 18(1) 116(3) 74(2) -35(2) 0 0

C(2) 18(1) 116(3) 74(2) -35(2) 0 0

C(8) 18(1) 116(3) 74(2) -35(2) 0 0

C(6) 18(1) 116(3) 74(2) -35(2) 0 0

C(7) 18(1) 116(3) 74(2) -35(2) 0 0

C(5) 18(1) 116(3) 74(2) -35(2) 0 0

______________________________________________________________________________ **Table S20. Hydrogen coordinates (x 104) and isotropic displacement parameters (Å2 x 103).**

________________________________________________________________________________

x y z U(eq)

________________________________________________________________________________

H(11) 2081 2355 3212 17

H(13) 3242 873 1669 19

H(12) 1960 1559 2083 19

H(28A) 1704 905 6644 25

H(28B) 1911 760 5663 25

H(20A) 2246 3700 5301 21

H(20B) 3188 4149 5173 21

H(21A) 1432 4493 4388 23

H(21B) 1896 4946 5138 23

H(29A) 3335 793 6403 25

H(29B) 3090 1570 6774 25

H(22A) 2162 5516 3806 27

H(22B) 3129 5304 4244 27

H(30A) 3447 1267 5020 21

H(30B) 4130 1710 5629 21

H(27A) 819 1707 5786 26

H(27B) 1520 2147 6379 26

H(26A) 1592 2605 4990 22

H(26B) 1848 1825 4631 22

H(17A) 4463 -172 2813 35

H(17B) 4961 292 3535 35

H(17C) 5576 -141 2862 35

H(23A) 3189 4958 2814 28

H(23B) 2244 4509 2912 28

H(24A) 3520 3703 2958 23

H(24B) 3983 4147 3716 23

H(18A) 4514 178 1361 40

H(18B) 5608 333 1301 40

H(18C) 4878 949 1064 40

H(9) 5000 2618 6329 83

H(1) 5000 5570 5660 83

H(2) 5000 5073 7095 83

H(8) 5000 1699 7351 83

H(6) 5000 3172 9152 83

H(7) 5000 2056 8816 83

H(5) 5000 4123 8197 83

________________________________________________________________________________ **Table S21. Torsion angles [°].**

________________________________________________________________

C(10)-C(11)-C(12)-C(13) -0.6(6)

C(14)-C(13)-C(12)-C(11) 0.1(6)

C(10)-P(1)-C(19)-C(24) -78.7(3)

C(25)-P(1)-C(19)-C(24) 173.1(3)

Cu(1)-P(1)-C(19)-C(24) 52.6(3)

C(10)-P(1)-C(19)-C(20) 160.9(3)

C(25)-P(1)-C(19)-C(20) 52.7(3)

Cu(1)-P(1)-C(19)-C(20) -67.8(3)

C(24)-C(19)-C(20)-C(21) 58.1(4)

P(1)-C(19)-C(20)-C(21) 177.4(3)

C(15)#1-O(1)-C(15)-C(10) -143.2(3)

C(15)#1-O(1)-C(15)-C(14) 38.0(6)

C(19)-C(20)-C(21)-C(22) -57.8(4)

C(12)-C(11)-C(10)-C(15) -0.2(6)

C(12)-C(11)-C(10)-P(1) 180.0(3)

O(1)-C(15)-C(10)-C(11) -177.3(3)

C(14)-C(15)-C(10)-C(11) 1.4(6)

O(1)-C(15)-C(10)-P(1) 2.5(5)

C(14)-C(15)-C(10)-P(1) -178.7(3)

C(19)-P(1)-C(10)-C(11) -34.7(4)

C(25)-P(1)-C(10)-C(11) 75.3(4)

Cu(1)-P(1)-C(10)-C(11) -159.8(3)

C(19)-P(1)-C(10)-C(15) 145.4(3)

C(25)-P(1)-C(10)-C(15) -104.6(3)

Cu(1)-P(1)-C(10)-C(15) 20.3(4)

C(27)-C(28)-C(29)-C(30) -56.8(5)

C(20)-C(21)-C(22)-C(23) 56.6(5)

C(28)-C(29)-C(30)-C(25) 56.5(5)

C(29)-C(28)-C(27)-C(26) 57.6(5)

C(28)-C(27)-C(26)-C(25) -58.2(5)

C(3)-N(1)-N(2)-C(1) 0.000(3)

Cu(1)-N(1)-N(2)-C(1) 180.000(3)

C(21)-C(22)-C(23)-C(24) -55.6(5)

C(27)-C(26)-C(25)-C(30) 57.6(4)

C(27)-C(26)-C(25)-P(1) -177.1(3)

C(29)-C(30)-C(25)-C(26) -56.6(4)

C(29)-C(30)-C(25)-P(1) 174.6(3)

C(10)-P(1)-C(25)-C(26) -59.3(3)

C(19)-P(1)-C(25)-C(26) 48.9(3)

Cu(1)-P(1)-C(25)-C(26) 169.5(3)

C(10)-P(1)-C(25)-C(30) 66.4(3)

C(19)-P(1)-C(25)-C(30) 174.6(3)

Cu(1)-P(1)-C(25)-C(30) -64.8(3)

C(12)-C(13)-C(14)-C(15) 1.0(6)

C(12)-C(13)-C(14)-C(16) 177.1(4)

O(1)-C(15)-C(14)-C(13) 176.9(3)

C(10)-C(15)-C(14)-C(13) -1.8(6)

O(1)-C(15)-C(14)-C(16) 0.6(6)

C(10)-C(15)-C(14)-C(16) -178.1(4)

C(20)-C(19)-C(24)-C(23) -57.8(4)

P(1)-C(19)-C(24)-C(23) -178.7(3)

C(22)-C(23)-C(24)-C(19) 56.6(5)

C(13)-C(14)-C(16)-C(18) 26.1(6)

C(15)-C(14)-C(16)-C(18) -157.9(4)

C(13)-C(14)-C(16)-C(14)#1 149.0(3)

C(15)-C(14)-C(16)-C(14)#1 -34.9(6)

C(13)-C(14)-C(16)-C(17) -94.1(5)

C(15)-C(14)-C(16)-C(17) 81.9(5)

N(2)-N(1)-C(3)-C(4) 180.000(3)

Cu(1)-N(1)-C(3)-C(4) 0.000(6)

N(2)-N(1)-C(3)-C(2) 0.000(3)

Cu(1)-N(1)-C(3)-C(2) 180.000(4)

N(1)-N(2)-C(1)-C(2) 0.000(5)

N(1)-C(3)-C(4)-C(5) 180.000(4)

C(2)-C(3)-C(4)-C(5) 0.000(6)

N(1)-C(3)-C(4)-C(9) 0.000(6)

C(2)-C(3)-C(4)-C(9) 180.000(4)

C(8)-C(9)-C(4)-C(3) 180.000(4)

C(8)-C(9)-C(4)-C(5) 0.000(5)

N(2)-C(1)-C(2)-C(3) 0.000(4)

N(1)-C(3)-C(2)-C(1) 0.000(4)

C(4)-C(3)-C(2)-C(1) 180.000(4)

C(4)-C(9)-C(8)-C(7) 0.000(4)

C(5)-C(6)-C(7)-C(8) 0.000(6)

C(9)-C(8)-C(7)-C(6) 0.000(6)

C(7)-C(6)-C(5)-C(4) 0.000(6)

C(3)-C(4)-C(5)-C(6) 180.000(4)

C(9)-C(4)-C(5)-C(6) 0.000(5)

________________________________________________________________

Symmetry transformations used to generate equivalent atoms:

#1 -x+1,y,z

**Table S22. Hydrogen bonds [Å and °].**

____________________________________________________________________________

D-H...A d(D-H) d(H...A) d(D...A) <(DHA)

____________________________________________________________________________

# General Procedure to Prepare Aryne Precursors

The synthesis of trifluoromethanesulfonate (Kobayashi precursors) were performed using standard literature-reported procedures.83

The synthesis of triaryoxonium ions (Smith precursors) were performed using standard literature-reported procedures.35

# NMR Spectra

**1,5-Diphenyl-1*H*-pyrazole (3a)**

**5-Methyl-1-phenyl-1*H*-pyrazole (3b)**

**5-Cyclopropyl-1-phenyl-1*H*-pyrazole (3c)**

**5-Isopropyl-1-phenyl-1*H*-pyrazole (3d)**

**5-(Tert-butyl)-1-phenyl-1*H*-pyrazole (3e)**

**5-Bromo-1-phenyl-1*H*-pyrazole (3f)**

**5-Iodo-1-phenyl-1*H*-pyrazole (3g)**

**1-Phenyl-5-(o-tolyl)-1*H*-pyrazole (3h)**

**5-(2-Fluorophenyl)-1-phenyl-1*H*-pyrazole (3i)**

**5-(2-Bromophenyl)-1-phenyl-1*H*-pyrazole (3j)**

**5-(2-Methoxyphenyl)-1-phenyl-1*H*-pyrazole (3k)**

**1-Phenyl-5-(p-tolyl)-1*H*-pyrazole (3l)**

**5-(4-Chlorophenyl)-1-phenyl-1*H*-pyrazole (3m)**

**5-(4-Fluorophenyl)-1-phenyl-1*H*-pyrazole (3n)**

**5-(3-Methoxyphenyl)-1-phenyl-1*H*-pyrazole (3o)**

**5-(4-Methoxyphenyl)-1-phenyl-1*H*-pyrazole (3p)**

**5-(Furan-2-yl)-1-phenyl-1*H*-pyrazole (3q)**

**4-(1-Phenyl-1*H*-pyrazol-5-yl)pyridine (3r)**

**3-Methyl-1,5-diphenyl-1*H*-pyrazole (3s)**

**5-(Tert-butyl)-3-methyl-1-phenyl-1*H*-pyrazole (3t)**

**5-(Tert-butyl)-3-iodo-1-phenyl-1*H*-pyrazole (3u)**

**1,5-Diphenyl-1*H*-pyrazol-3-amine (3v)**

**3-Cyclopropyl-1-phenyl-5-(trifluoromethyl)-1*H*-pyrazole (3w)**

**Methyl 5-ethyl-1-phenyl-1*H*-pyrazole-3-carboxylate (3x)**

**Methyl 4-bromo-1-phenyl-1*H*-pyrazole-3-carboxylate (3y)**

**Ethyl 5-cyclopropyl-1-phenyl-1*H*-pyrazole-4-carboxylate (3z)**

**1-Phenyl-1*H*-indazole (3aa)**

**1,5-Diphenyl-1*H*-1,2,4-triazole (3ab)**

**
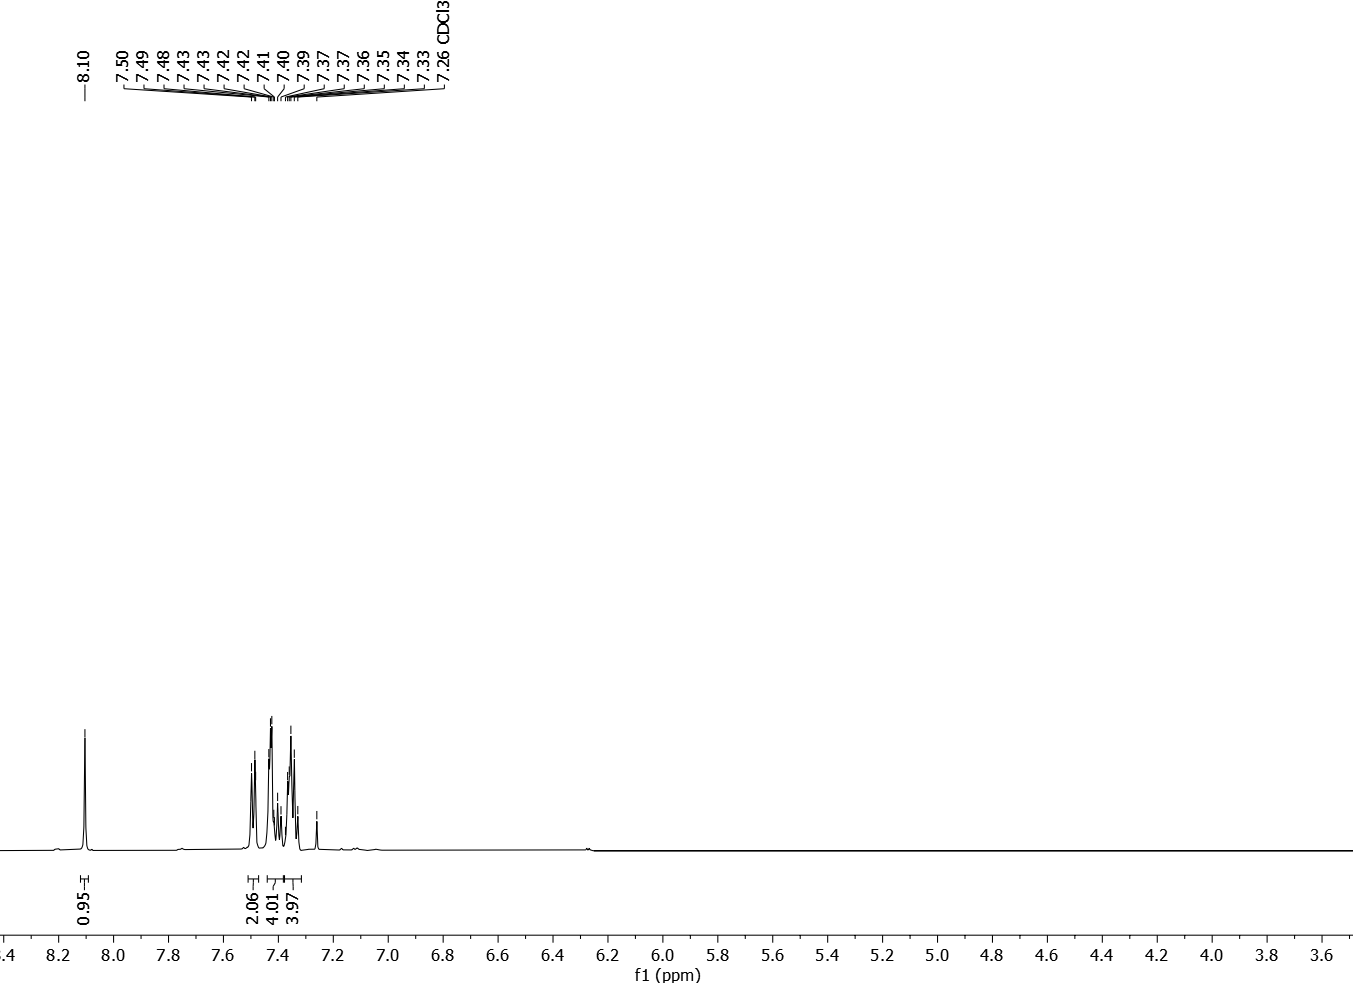
**

**
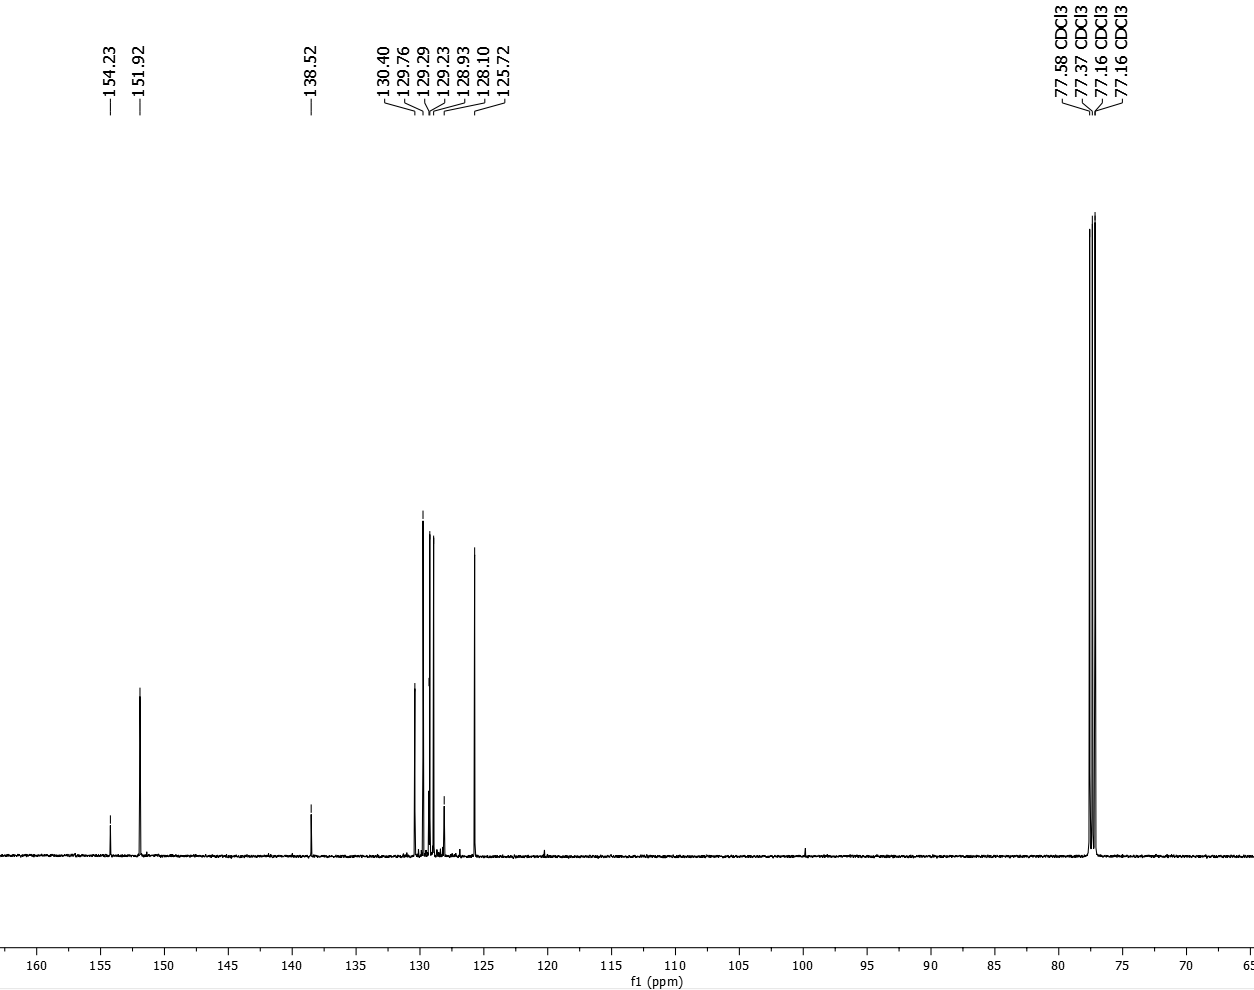
**

**4-Bromo-2-phenyl-2*H*-1,2,3-triazole (3ac)**

**1,3-Diphenyl-1*H*-pyrazole (4a)**

**
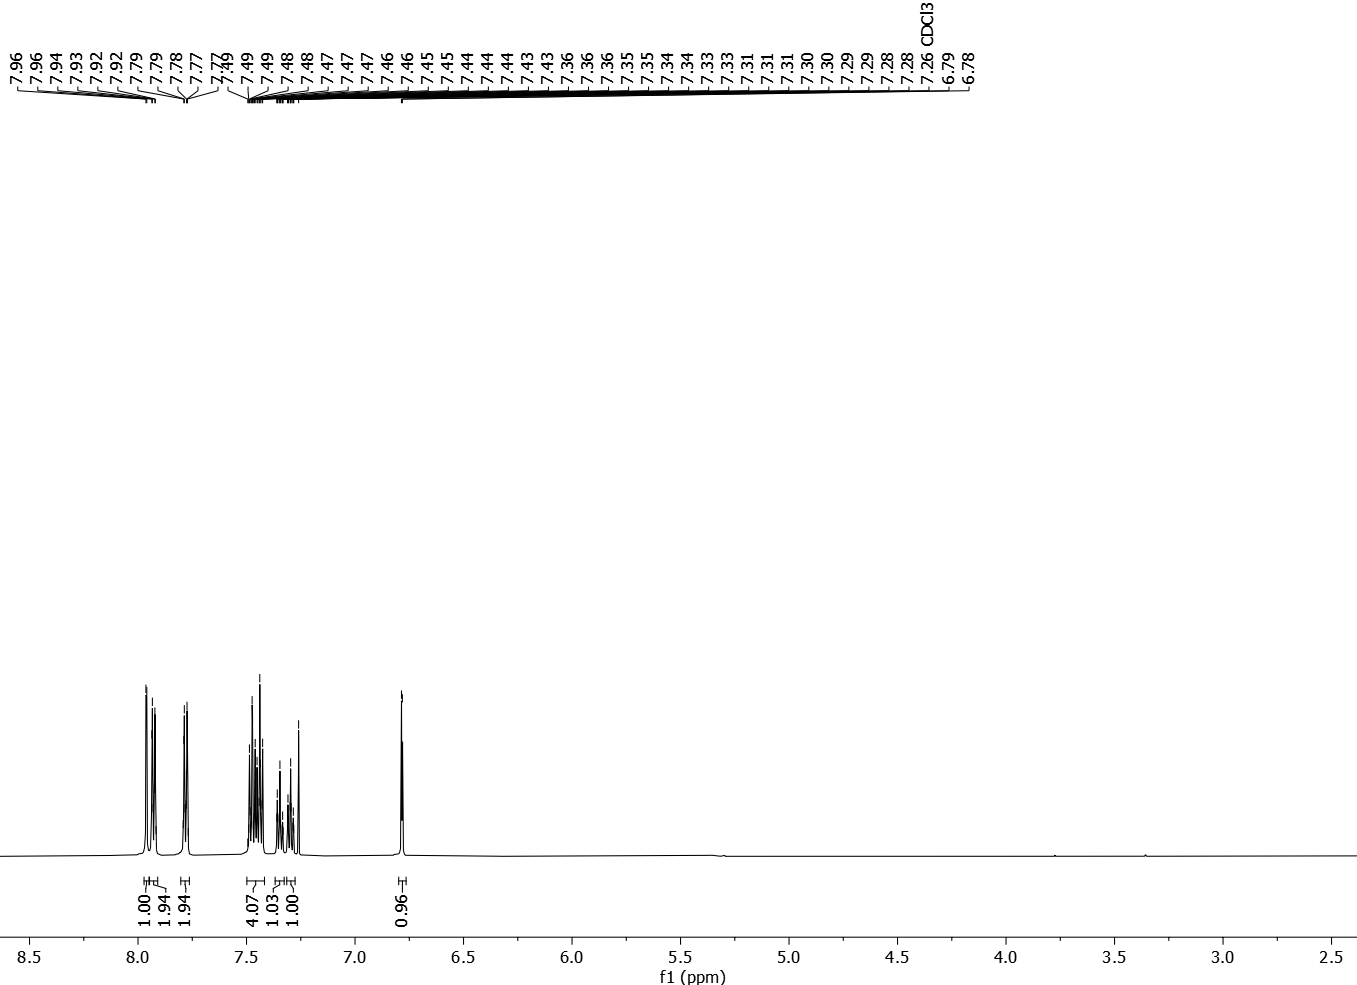
**

**
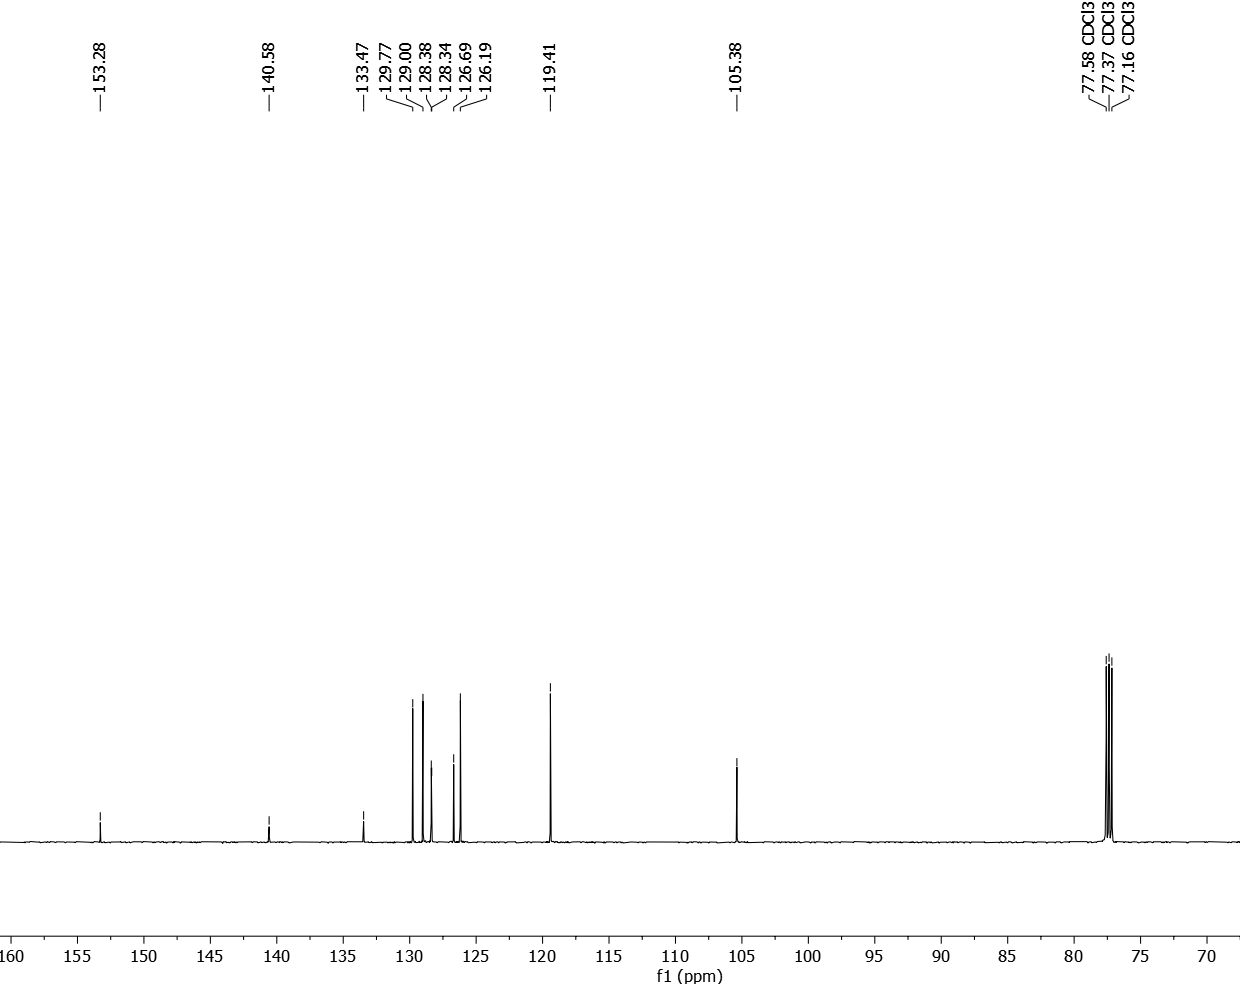
**

**3-Methyl-1-phenyl-1*H*-pyrazole (4b)**

**3-Cyclopropyl-1-phenyl-1*H*-pyrazole (4c)**

**3-Isopropyl-1-phenyl-1*H*-pyrazole (4d)**

**3-(Tert-butyl)-1-phenyl-1*H*-pyrazole (4e)**

**1-Phenyl-3-(o-tolyl)-1*H*-pyrazole (4f)**

**3-(2-Fluorophenyl)-1-phenyl-1*H*-pyrazole (4g)**

**3-(2-Bromophenyl)-1-phenyl-1*H*-pyrazole (4h)**

**3-(2-Methoxyphenyl)-1-phenyl-1*H*-pyrazole (4i)**

**1-Phenyl-3-(p-tolyl)-1*H*-pyrazole (4j)**

**3-(4-Chlorophenyl)-1-phenyl-1*H*-pyrazole (4k)**

**3-(4-Fluorophenyl)-1-phenyl-1*H*-pyrazole (4l)**

**3-(4-Methoxyphenyl)-1-phenyl-1*H*-pyrazole (4m)**

**3-(3-Methoxyphenyl)-1-phenyl-1*H*-pyrazole (4n)**

**3-(Furan-2-yl)-1-phenyl-1*H*-pyrazole (4o)**

**5-Methyl-1,3-diphenyl-1*H*-pyrazole (4p)**

**3-(Tert-butyl)-5-methyl-1-phenyl-1*H*-pyrazole (4q)**

**1,3-Diphenyl-1*H*-pyrazol-5-amine (4r)**

**Ethyl 3-cyclopropyl-1-phenyl-1*H*-pyrazole-4-carboxylate (4s)**

**1-Phenyl-1*H*-indazole (4t)**

**1-(3,4-Dimethylphenyl)-5-phenyl-1*H*-pyrazole (5a)**

**1-(3,4-Dimethoxyphenyl)-5-phenyl-1*H*-pyrazole (5b)**

**1-(Naphthalen-2-yl)-5-phenyl-1*H*-pyrazole (5c)**

**5-Phenyl-1-(m-tolyl)-1*H*-pyrazole (5f)**

**5-Phenyl-1-(2-(trimethylsilyl)phenyl)-1*H*-pyrazole (5g)**

**1-([1,1'-Biphenyl]-2-yl)-5-phenyl-1*H*-pyrazole (5h)**

**5h**

NOE (600 MHz, CD3CN)

**1-(Naphthalen-1-yl)-5-phenyl-1*H*-pyrazole (5j’)**

**3-Cyano-*N*-(5-phenyl-1*H*-pyrazol-3-yl)benzamide (6)**

**
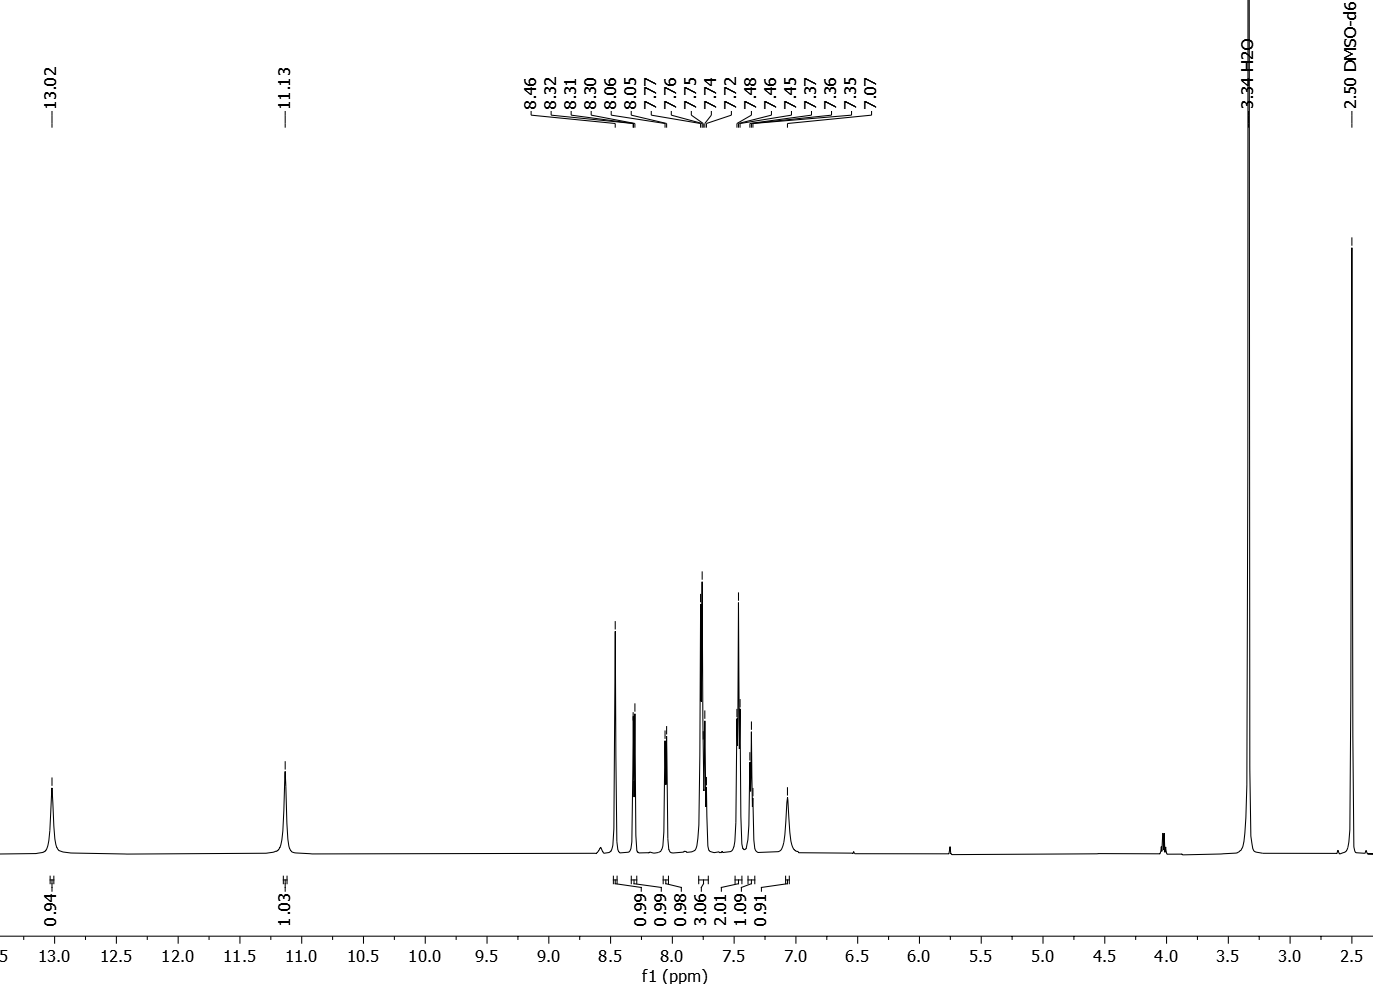
**

**
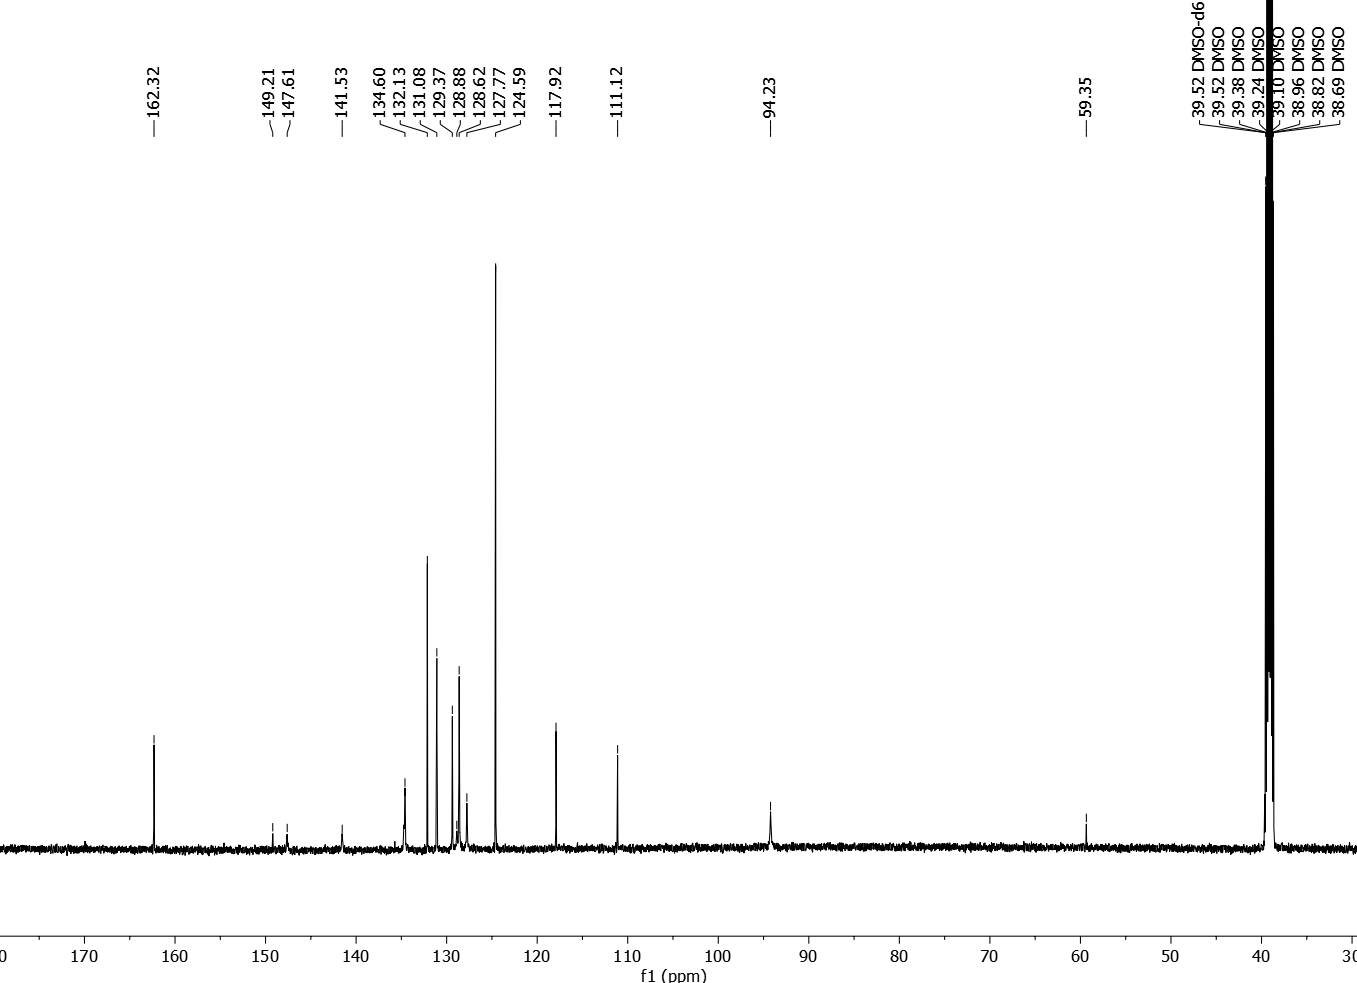
**

**3-Cyano-*N*-(1,3-diphenyl-1*H*-pyrazol-5-yl)benzamide (7, CDPPB)**

**
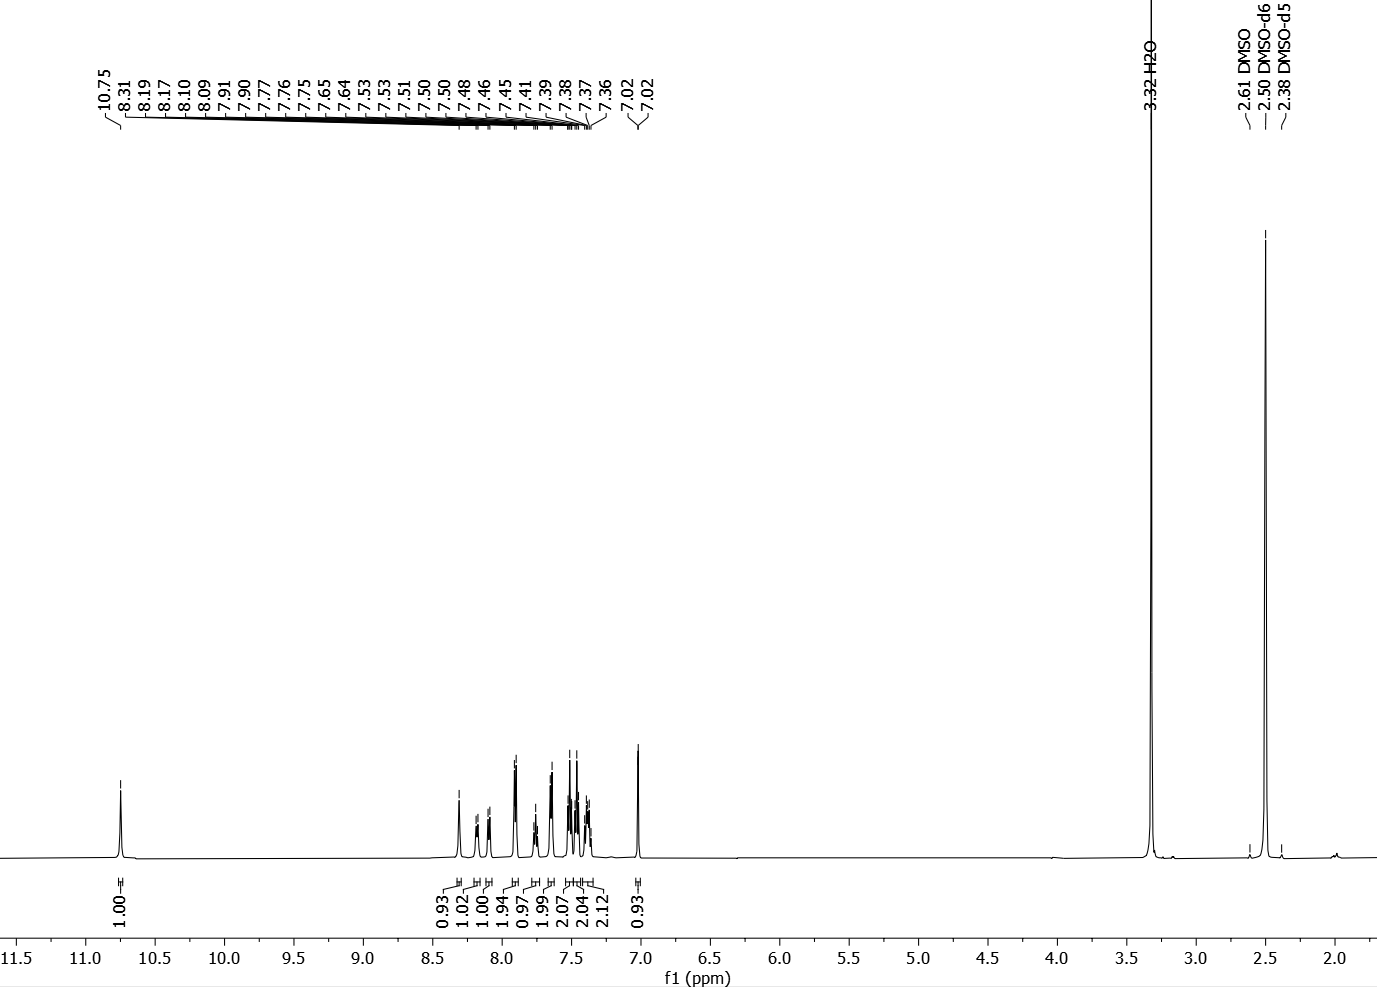
**
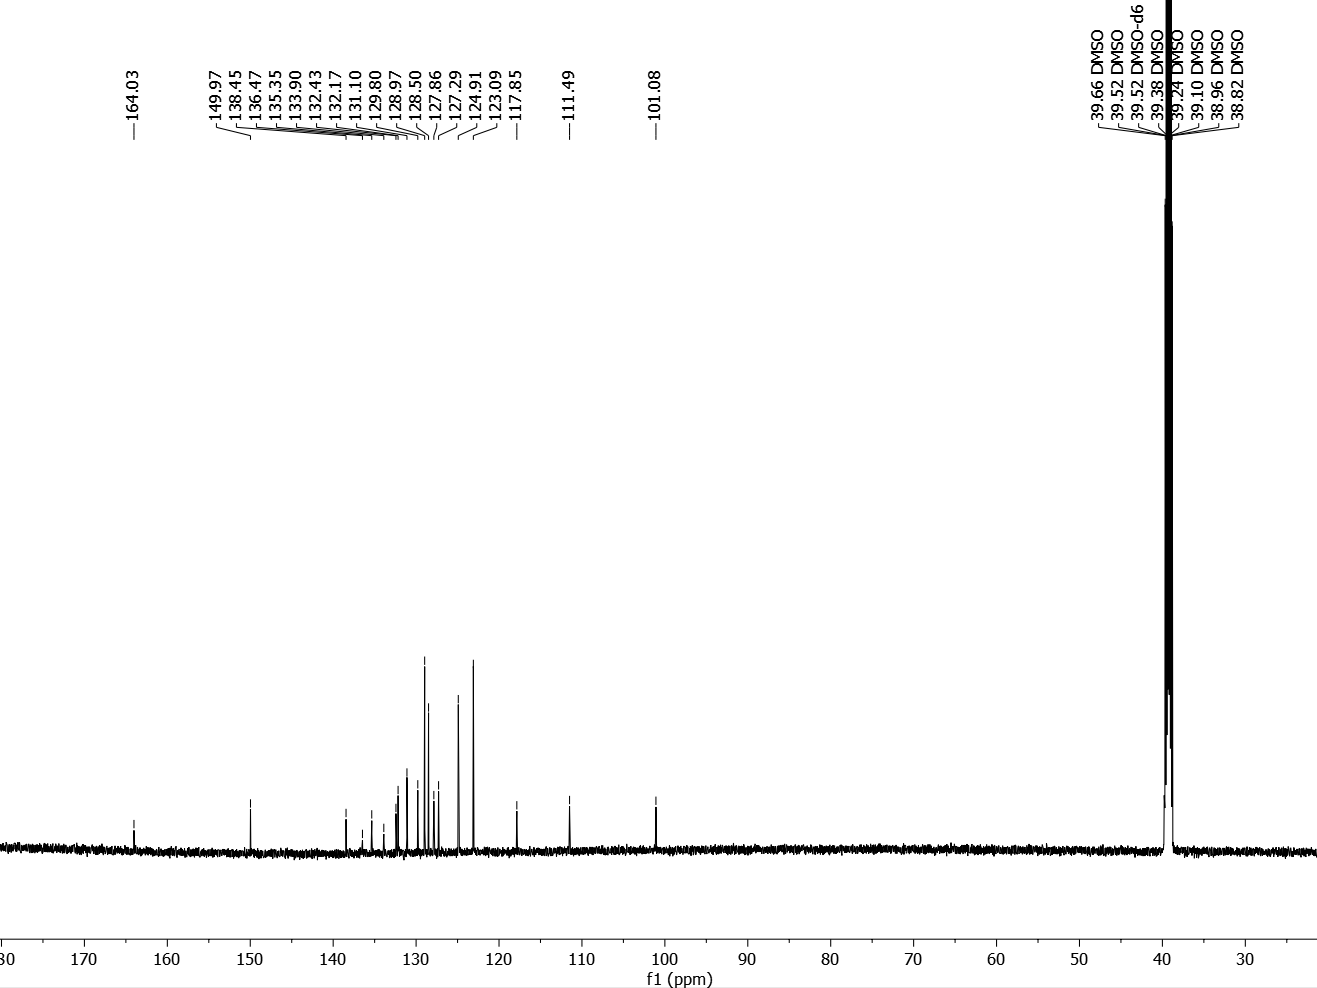


**3-Cyano-*N*-(1,5-diphenyl-1*H*-pyrazol-3-yl)benzamide (8, CDPPB-*N-*Isomer)**


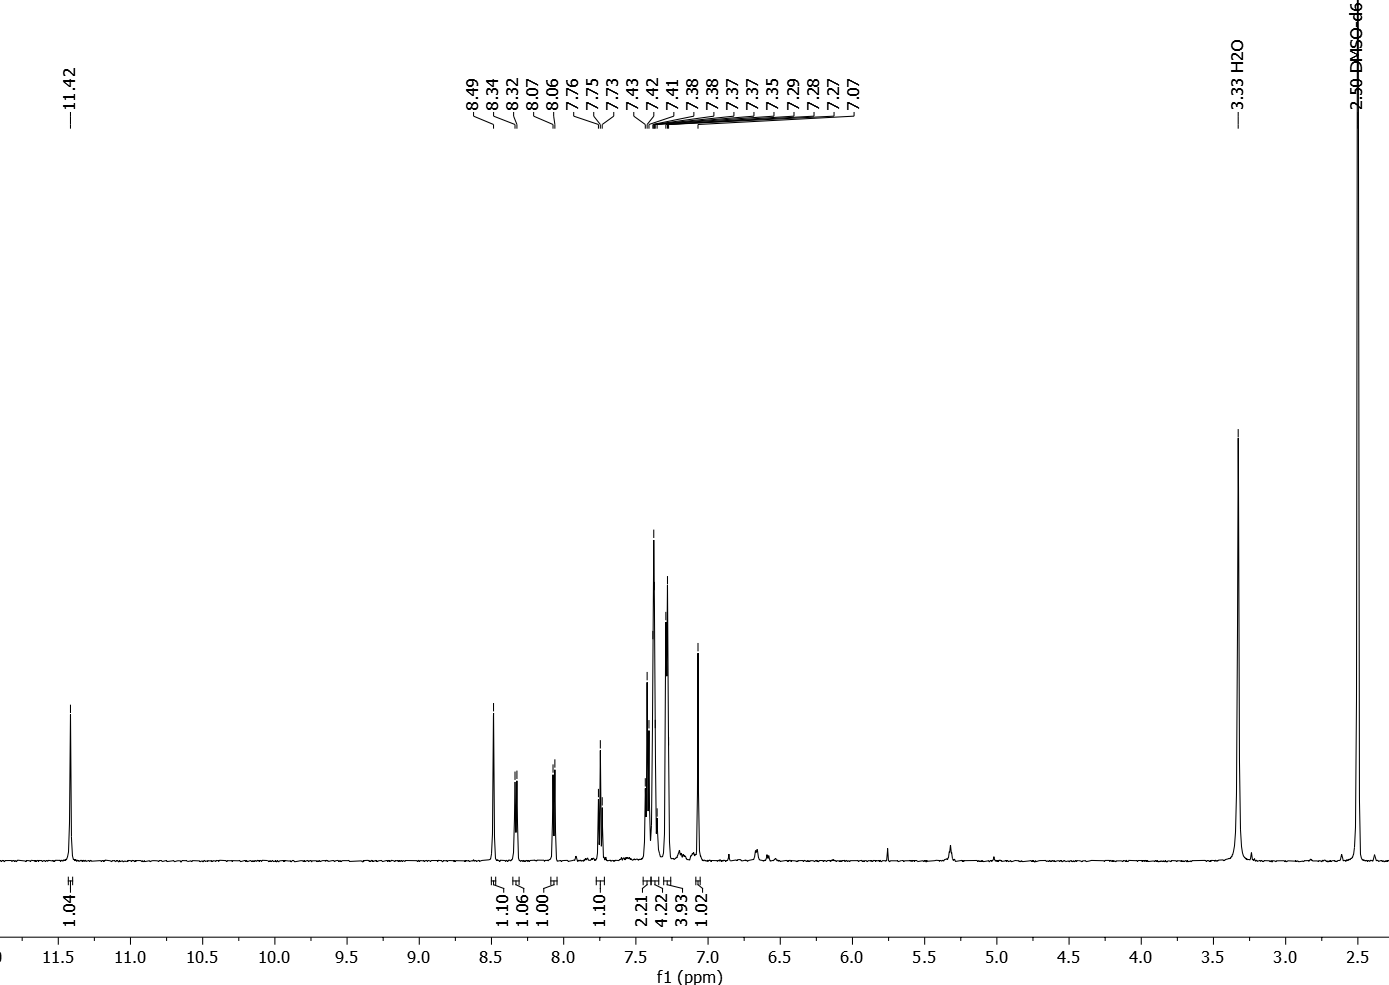


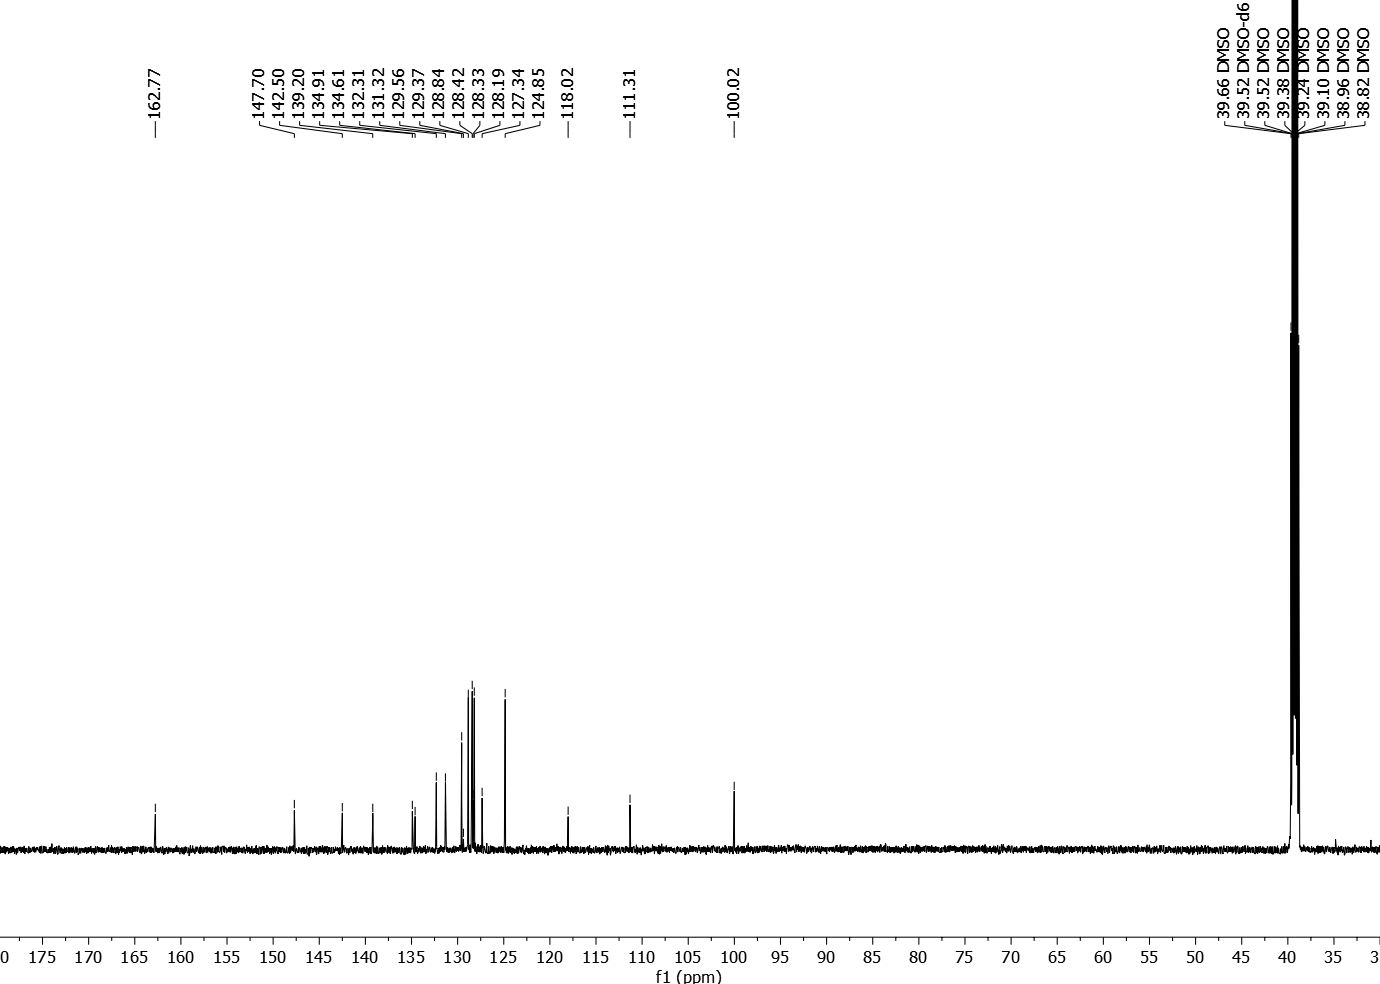


**CyXant-Cu-Nα**


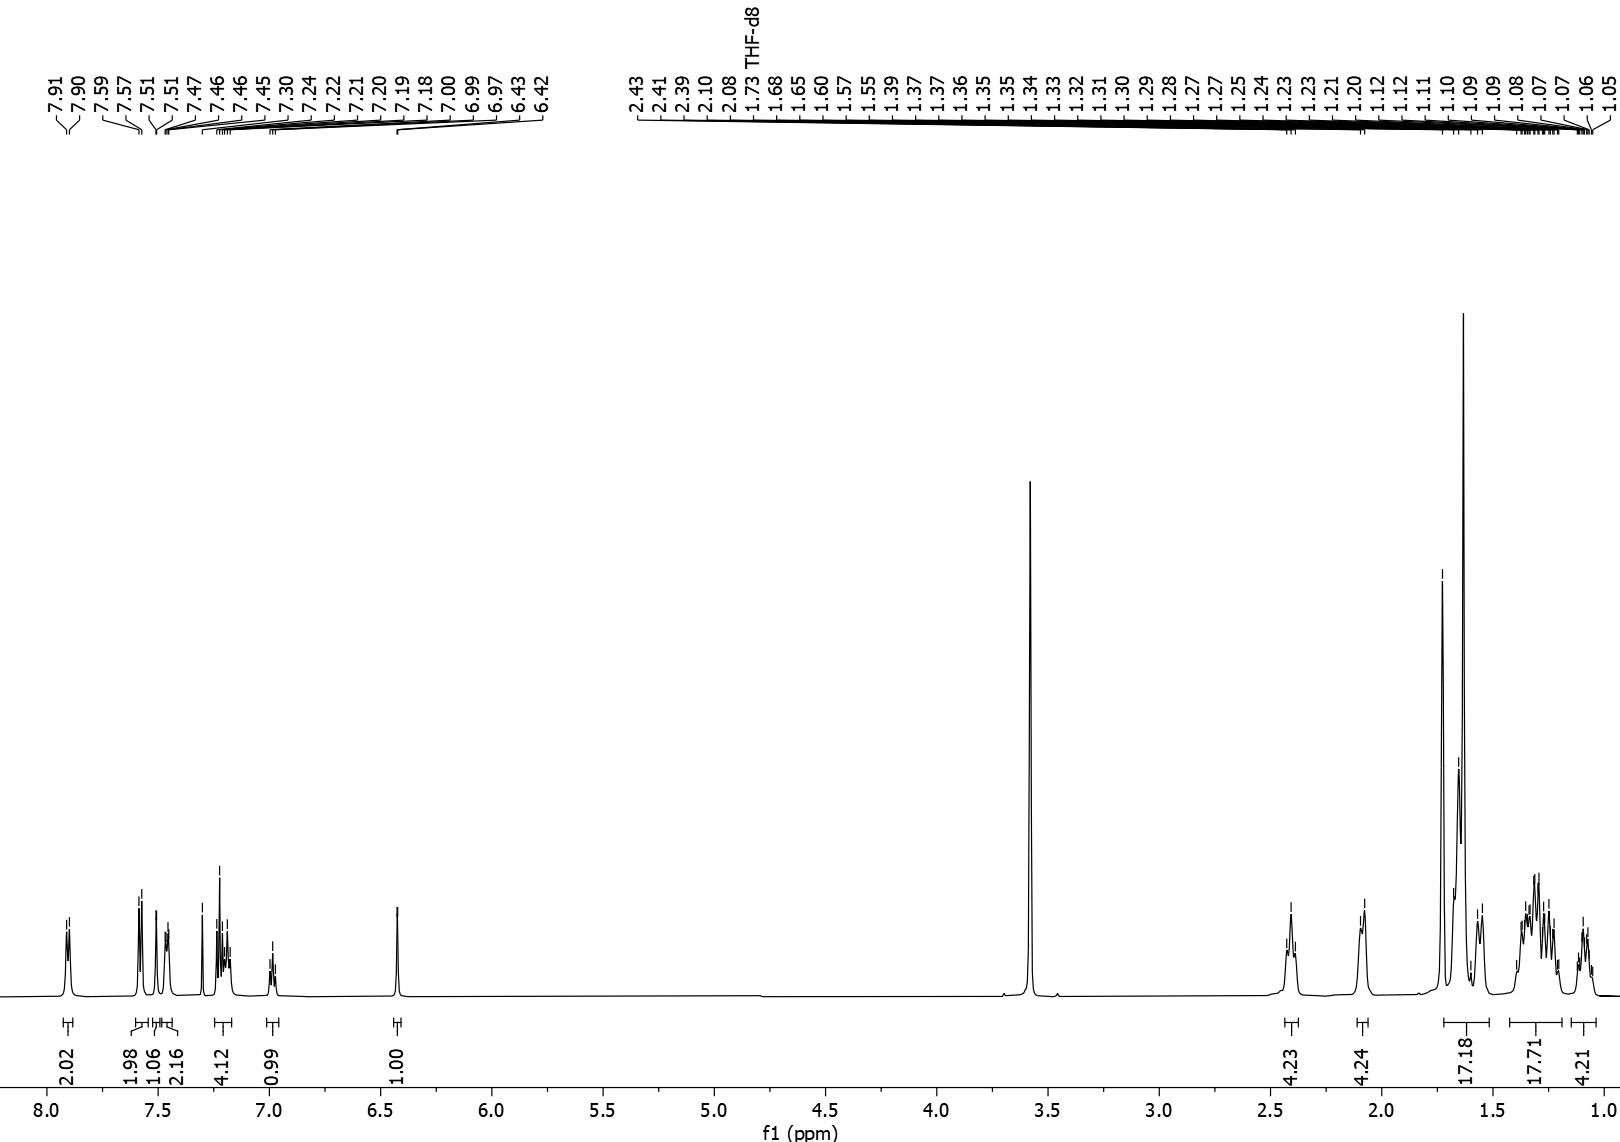


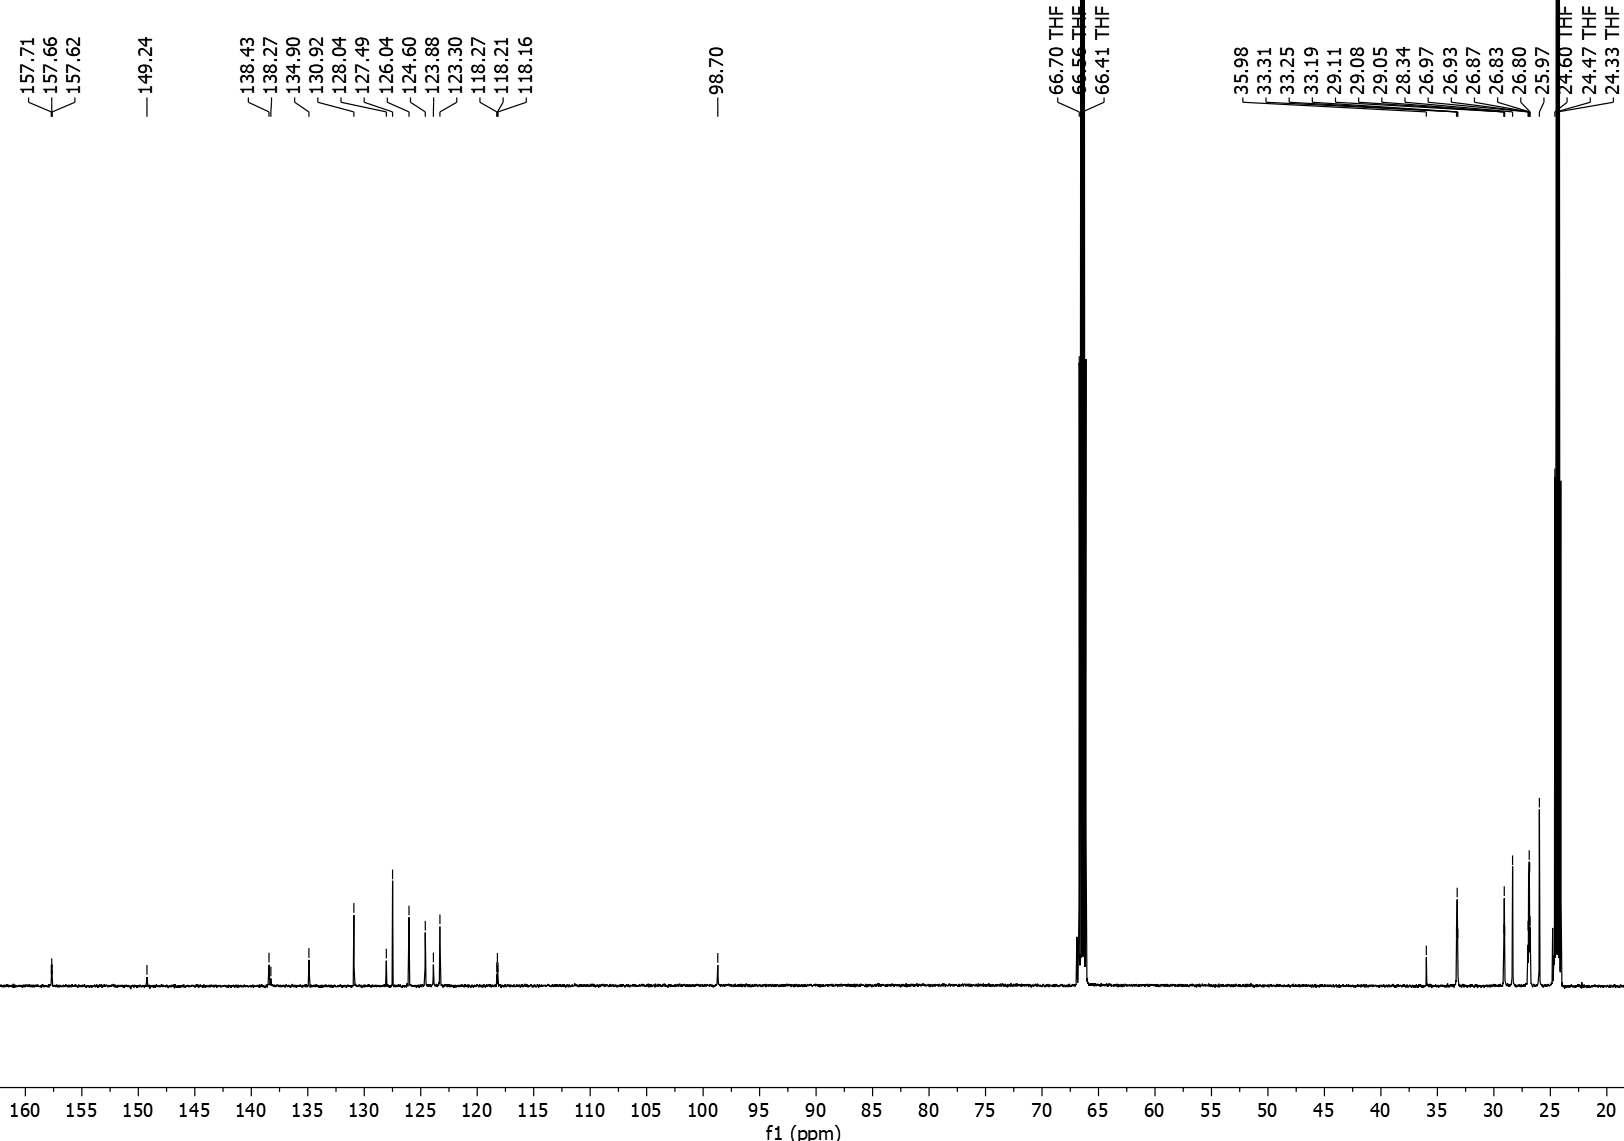


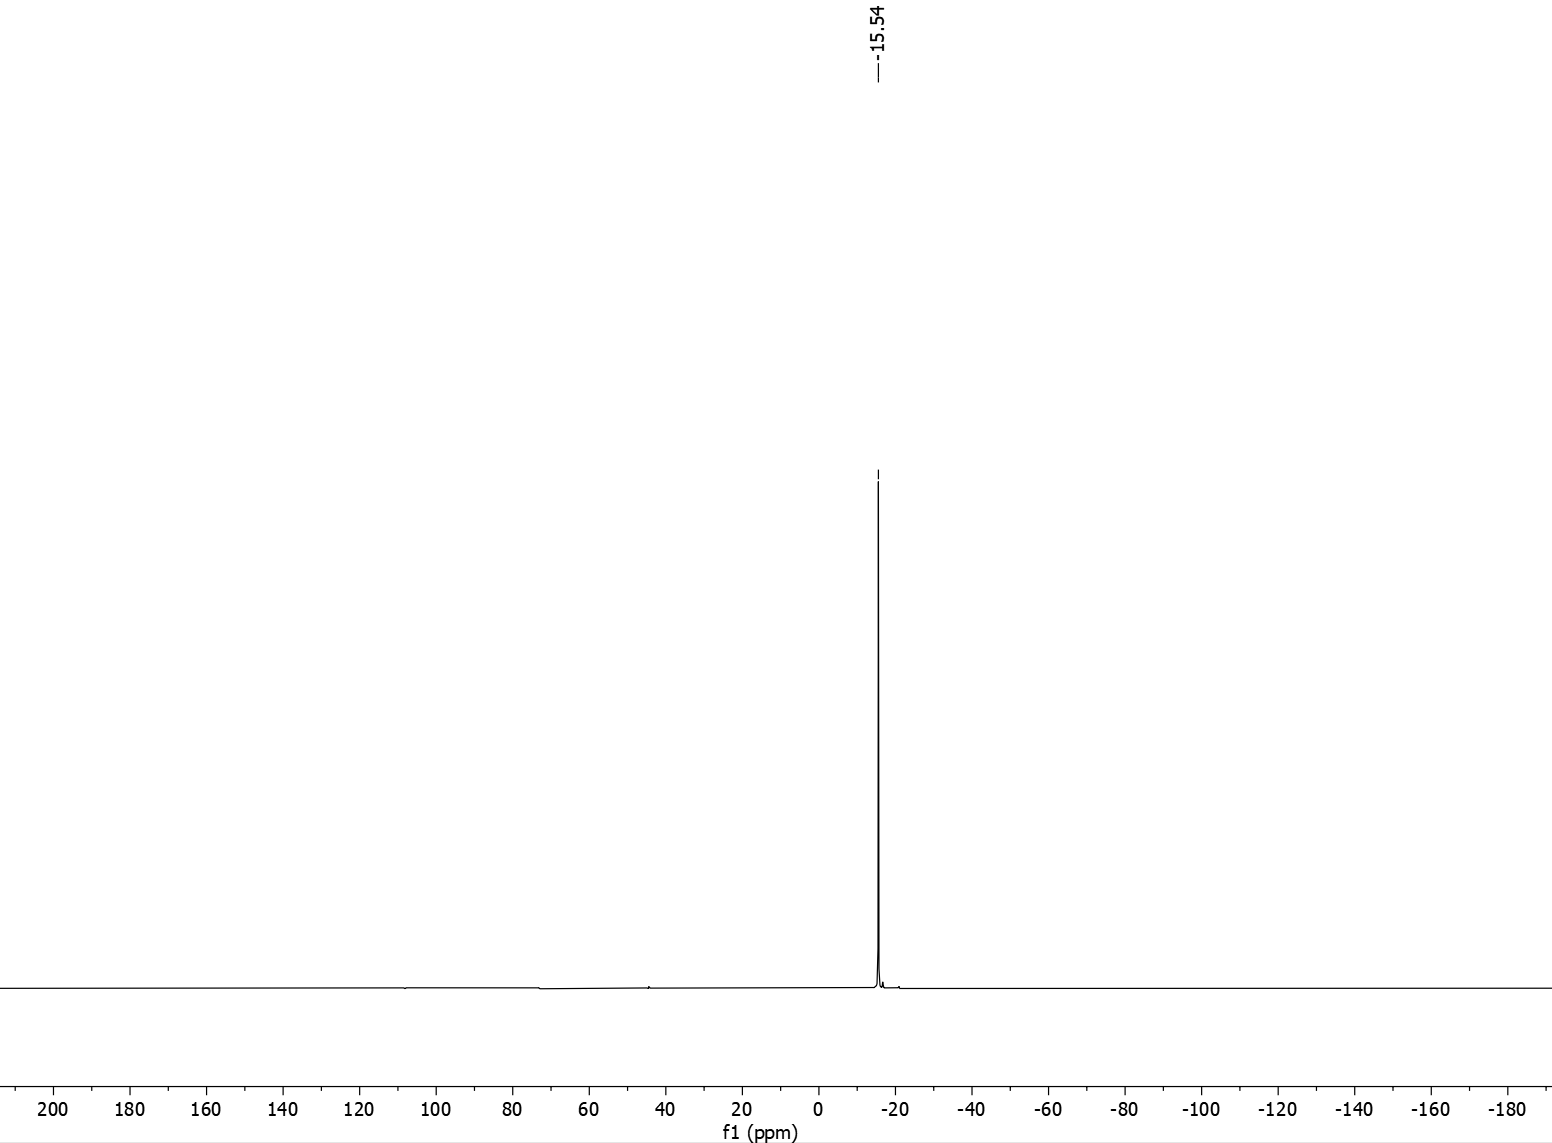


# References and Notes

1. Wenk, H. H., Winkler, M. & Sander, W. One Century of Aryne Chemistry. *Angew. Chem. Int. Ed.* **42**, 502–528 (2003).

2. Tadross, P. M. & Stoltz, B. M. A Comprehensive History of Arynes in Natural Product Total Synthesis. *Chem. Rev.* **112**, 3550–3577 (2012).

3. Marshall, C. M., Federice, J. G., Bell, C. N., Cox, P. B. & Njardarson, J. T. An Update on the Nitrogen Heterocycle Compositions and Properties of U.S. FDA-Approved Pharmaceuticals (2013–2023). *J. Med. Chem.* acs.jmedchem.4c01122 (2024) doi:10.1021/acs.jmedchem.4c01122.

4. Blakemore, D. C. *et al.* Organic synthesis provides opportunities to transform drug discovery. *Nat. Chem.* **10**, 383–394 (2018).

5. Campos, K. R. *et al.* The importance of synthetic chemistry in the pharmaceutical industry. *Science* **363**, eaat0805 (2019).

6. Hartwig, J. F. Catalyst-Controlled Site-Selective Bond Activation. *Acc. Chem. Res.* **50**, 549–555 (2017).

7. Shugrue, C. R. & Miller, S. J. Applications of Nonenzymatic Catalysts to the Alteration of Natural Products. *Chem. Rev.* **117**, 11894–11951 (2017).

8. Hoye, T. R., Baire, B., Niu, D., Willoughby, P. H. & Woods, B. P. The hexadehydro-Diels–Alder reaction. *Nature* **490**, 208–212 (2012).

9. Niu, D., Willoughby, P. H., Woods, B. P., Baire, B. & Hoye, T. R. Alkane desaturation by concerted double hydrogen atom transfer to benzyne. *Nature* **501**, 531–534 (2013).

10. Humke, J. N. *et al.* Nickel binding enables isolation and reactivity of previously inaccessible 7-aza-2,3-indolynes. *Science* **384**, 408–414 (2024).

11. Ishihara, Y., Montero, A. & Baran, P. S. *The Portable Chemist’s Consultant: A Survival Guide for Discovery, Process, and Radiolabeling.* (Apple Publishing Group, La Jolla, California, 2013).

12. Cernak, T., Dykstra, K. D., Tyagarajan, S., Vachal, P. & Krska, S. W. The medicinal chemist’s toolbox for late stage functionalization of drug-like molecules. *Chem. Soc. Rev.* **45**, 546–576 (2016).

13. Li, F., Nie, J., Sun, L., Zheng, Y. & Ma, J. Silver‐Mediated Cycloaddition of Alkynes with CF 3 CHN 2 : Highly Regioselective Synthesis of 3‐Trifluoromethylpyrazoles. *Angew. Chem. Int. Ed.* **52**, 6255–6258 (2013).

14. Antilla, J. C., Baskin, J. M., Barder, T. E. & Buchwald, S. L. Copper−Diamine-Catalyzed *N* -Arylation of Pyrroles, Pyrazoles, Indazoles, Imidazoles, and Triazoles. *J. Org. Chem.* **69**, 5578–5587 (2004).

15. Ruiz-Castillo, P. & Buchwald, S. L. Applications of Palladium-Catalyzed C–N Cross-Coupling Reactions. *Chem. Rev.* **116**, 12564–12649 (2016).

16. West, M. J., Fyfe, J. W. B., Vantourout, J. C. & Watson, A. J. B. Mechanistic Development and Recent Applications of the Chan–Lam Amination. *Chem. Rev.* **119**, 12491–12523 (2019).

17. Ghosh, I. *et al.* General cross-coupling reactions with adaptive dynamic homogeneous catalysis. *Nature* (2023) doi:10.1038/s41586-023-06087-4.

18. Wang, M. *et al.* Copper-Catalyzed Hydroamination: Enantioselective Addition of Pyrazoles to Cyclopropenes. *J. Am. Chem. Soc.* **145**, 14573–14580 (2023).

19. Kim, K. & Lee, Y. Copper-Catalyzed Hydroamination of Oxa- and Azabenzonorbornadienes with Pyrazoles. *J. Org. Chem.* **87**, 569–578 (2022).

20. Bullock, R. M. *et al.* Using nature’s blueprint to expand catalysis with Earth-abundant metals. *Science* **369**, eabc3183 (2020).

21. Kainz, Q. M. *et al.* Asymmetric copper-catalyzed C-N cross-couplings induced by visible light. *Science* **351**, 681–684 (2016).

22. Chai, Y., Shen, S., Weng, G. & Pan, Y. Gas-phase synthesis and reactivity of Cu+ –benzyne complexes. *Chem Commun* **50**, 11668–11671 (2014).

23. Mizukoshi, Y., Mikami, K. & Uchiyama, M. Aryne Polymerization Enabling Straightforward Synthesis of Elusive Poly( *ortho* -arylene)s. *J. Am. Chem. Soc.* **137**, 74–77 (2015).

24. Wiberg, K. B. The Concept of Strain in Organic Chemistry. *Angew. Chem. Int. Ed. Engl.* **25**, 312–322 (1986).

25. Kelleghan, A. V., Bulger, A. S., Witkowski, D. C. & Garg, N. K. Strain-promoted reactions of 1,2,3-cyclohexatriene and its derivatives. *Nature* **618**, 748–754 (2023).

26. Xu, D. *et al.* Magnesium-Catalyzed N2-Regioselective Alkylation of 3-Substituted Pyrazoles. *Synlett* **31**, 595–599 (2020).

27. Chen, S.-J., Golden, D. L., Krska, S. W. & Stahl, S. S. Copper-Catalyzed Cross-Coupling of Benzylic C–H Bonds and Azoles with Controlled *N* -Site Selectivity. *J. Am. Chem. Soc.* **143**, 14438–14444 (2021).

28. Desai, S. P., Yatzoglou, G., Turner, J. A. & Taylor, M. S. Boronic Acid-Catalyzed Regio- and Stereoselective *N* -Glycosylations of Purines and Other Azole Heterocycles: Access to Nucleoside Analogues. *J. Am. Chem. Soc.* **146**, 4973–4984 (2024).

29. Dalton, D. M., Walroth, R. C., Rouget-Virbel, C., Mack, K. A. & Toste, F. D. Utopia Point Bayesian Optimization Finds Condition-Dependent Selectivity for *N* -Methyl Pyrazole Condensation. *J. Am. Chem. Soc.* **146**, 15779–15786 (2024).

30. Shi, J., Li, L. & Li, Y. *o* -Silylaryl Triflates: A Journey of Kobayashi Aryne Precursors. *Chem. Rev.* **121**, 3892–4044 (2021).

31. Mukherjee, A., Subramanyam, U., Puranik, V. G., Mohandas, T. P. & Sarkar, A. Pyrazole‐Tethered Heteroditopic Ligands and Their Transition Metal Complexes: Synthesis, Structure, and Reactivity. *Eur. J. Inorg. Chem.* **2005**, 1254–1263 (2005).

32. Xu, Z.-L. *et al.* Cu(OAc)2·H2O-catalyzed N-arylation of nitrogen-containing heterocycles. *Tetrahedron* **67**, 5282–5288 (2011).

33. Onodera, S., Kochi, T. & Kakiuchi, F. Synthesis of *N* -Arylpyrazoles by Palladium-Catalyzed Coupling of Aryl Triflates with Pyrazole Derivatives. *J. Org. Chem.* **84**, 6508–6515 (2019).

34. Ueda, S., Su, M. & Buchwald, S. L. Highly N 2 ‐Selective Palladium‐Catalyzed Arylation of 1,2,3‐Triazoles. *Angew. Chem. Int. Ed.* **50**, 8944–8947 (2011).

35. Smith, O. *et al.* Harnessing triaryloxonium ions for aryne generation. *Nat. Synth.* (2023) doi:10.1038/s44160-023-00408-1.

36. Cheong, P. H.-Y. *et al.* Indolyne and Aryne Distortions and Nucleophilic Regioselectivites. *J. Am. Chem. Soc.* **132**, 1267–1269 (2010).

37. Denman, B. N., Plasek, E. E. & Roberts, C. C. Ligand-Induced Regioselectivity in Metal-Catalyzed Aryne Reactions Using Borylaryl Triflates as Aryne Precursors. *Organometallics* **42**, 859–864 (2023).

38. Lindsley, C. W. *et al.* Discovery of Positive Allosteric Modulators for the Metabotropic Glutamate Receptor Subtype 5 from a Series of *N* -(1,3-Diphenyl-1 *H* - pyrazol-5-yl)benzamides That Potentiate Receptor Function in Vivo. *J. Med. Chem.* **47**, 5825–5828 (2004).

39. Watanabe, Y. *et al.* Copper(I)–Pyrazolate Complexes as Solid-State Phosphors: Deep-Blue Emission through a Remote Steric Effect. *J. Am. Chem. Soc.* **144**, 10186–10192 (2022).

40. M06-2X/6-311+G(d,p) PCM(acetonitrile)//M06-2X/6-31G(d) level of theory was employed for the shown models, as implemented in Gaussian 16 (52–56). See SI for comparison of key transition states at various levels of theory.

41. Gianatassio, R. *et al.* Strain-release amination. *Science* **351**, 241–246 (2016).

42. Wiesenfeldt, M. P. *et al.* General access to cubanes as benzene bioisosteres. *Nature* **618**, 513–518 (2023).

43. Kleinmans, R. *et al.* Intermolecular [2π+2σ]-photocycloaddition enabled by triplet energy transfer. *Nature* **605**, 477–482 (2022).

44. Tena Meza, A. *et al.* σ-Bond insertion reactions of two strained diradicaloids. *Nature* (2025) doi:10.1038/s41586-025-08745-1.

45. Hehre, W. J., Stewart, R. F. & Pople, J. A. Self-Consistent Molecular-Orbital Methods. I. Use of Gaussian Expansions of Slater-Type Atomic Orbitals. *J. Chem. Phys.* **51**, 2657–2664 (1969).

46. Miertuš, S., Scrocco, E. & Tomasi, J. Electrostatic interaction of a solute with a continuum. A direct utilizaion of AB initio molecular potentials for the prevision of solvent effects. *Chem. Phys.* **55**, 117–129 (1981).

47. Zhao, Y. & Truhlar, D. G. The M06 suite of density functionals for main group thermochemistry, thermochemical kinetics, noncovalent interactions, excited states, and transition elements: two new functionals and systematic testing of four M06-class functionals and 12 other functionals. *Theor. Chem. Acc.* **120**, 215–241 (2008).

48. Tomasi, J., Mennucci, B. & Cammi, R. Quantum Mechanical Continuum Solvation Models. *Chem. Rev.* **105**, 2999–3094 (2005).

49. Frisch, M. J.; Trucks, G. W.; Schlegel, H. B.; Scuseria, G. E.; Robb, M. A.; Cheeseman, J. R.; Scalmani, G.; Barone, V.; Petersson, G. A.; Nakatsuji, H.; Li, X.; Caricato, M.; Marenich, A. V.; Bloino, J.; Janesko, B. G.; Gomperts, R.; Mennucci, B.; Hratchian, H. P.; Ortiz, J. V.; Izmaylov, A. F.; Sonnenberg, J. L.; Williams; Ding, F.; Lipparini, F.; Egidi, F.; Goings, J.; Peng, B.; Petrone, A.; Henderson, T.; Ranasinghe, D.; Zakrzewski, V. G.; Gao, J.; Rega, N.; Zheng, G.; Liang, W.; Hada, M.; Ehara, M.; Toyota, K.; Fukuda, R.; Hasegawa, J.; Ishida, M.; Nakajima, T.; Honda, Y.; Kitao, O.; Nakai, H.; Vreven, T.; Throssell, K.; Montgomery, J. A., Jr.; Peralta, J. E.; Ogliaro, F.; Bearpark, M. J.; Heyd, J. J.; Brothers, E. N.; Kudin, K. N.; Staroverov, V. N.; Keith, T. A.; Kobayashi, R.; Normand, J.; Raghavachari, K.; Rendell, A. P.; Burant, J. C.; Iyengar, S. S.; Tomasi, J.; Cossi, M.; Millam, J. M.; Klene, M.; Adamo, C.; Cammi, R.; Ochterski, J. W.; Martin, R. L.; Morokuma, K.; Farkas, O.; Foresman, J. B.; Fox, D. J. Gaussian 16; Rev. C.01: Wallingford, CT, 2016.

50. Lu, T. & Chen, Q. Independent gradient model based on Hirshfeld partition: A new method for visual study of interactions in chemical systems. *J. Comput. Chem.* **43**, 539–555 (2022).

51. Peruncheralathan, S., Khan, T. A., Ila, H. & Junjappa, H. Regioselective Synthesis of 1-Aryl-3,4-substituted/annulated-5-(methylthio)pyrazoles and 1-Aryl-3-(methylthio)-4,5-substituted/annulated Pyrazoles. *J. Org. Chem.* **70**, 10030–10035 (2005).

52. G. Menozzi, L. Mosti, P. Schenone, Reaction of 2‐dimethylaminomethylene‐1,3‐diones with dinucleophiles. VI. Synthesis of ethyl or methyl 1,5‐disubstituted 1 *H* ‐pyrazole‐4‐carboxylates. *Journal of Heterocyclic Chem* **24**, 1669–1675 (1987).

53. A. Boelke, T. J. Kuczmera, E. Lork, B. J. Nachtsheim, N‐Heterocyclic Iod(az)olium Salts – Potent Halogen‐Bond Donors in Organocatalysis. *Chemistry A European J* **27**, 13128–13134 (2021).

54. S. Hernández, I. Moreno, R. SanMartin, G. Gómez, M. T. Herrero, E. Domínguez, Toward Safer Processes for C−C Biaryl Bond Construction: Catalytic Direct C−H Arylation and Tin-Free Radical Coupling in the Synthesis of Pyrazolophenanthridines. *J. Org. Chem.* **75**, 434–441 (2010).

55. M. Rey, S. Beaumont, Molybdenum-Mediated One-Pot Synthesis of Pyrazoles from Isoxazoles. *Synthesis* **51**, 3796–3804 (2019).

56. M. Kashiwa, Y. Kuwata, M. Sonoda, S. Tanimori, Oxone-mediated facile access to substituted pyrazoles. *Tetrahedron* **72**, 304–311 (2016).

57. R. S. Foster, H. Jakobi, J. P. A. Harrity, A General and Regioselective Synthesis of 5-Trifluoromethyl-pyrazoles. *Org. Lett.* **14**, 4858–4861 (2012).

58. G. Pai, A. P. Chattopadhyay, N-Arylation of nitrogen containing heterocycles with aryl halides using copper nanoparticle catalytic system. *Tetrahedron Letters* **57**, 3140–3145 (2016).

59. N. Yang, G. Yuan, A Multicomponent Electrosynthesis of 1,5-Disubstituted and 1-Aryl 1,2,4-Triazoles. *J. Org. Chem.* **83**, 11963–11969 (2018).

60. X. Tang, L. Huang, J. Yang, Y. Xu, W. Wu, H. Jiang, Practical synthesis of pyrazoles via a copper-catalyzed relay oxidation strategy. *Chem. Commun.* **50**, 14793–14796 (2014).

61. G. Shan, P. Liu, Y. Rao, A New Synthesis of Pyrazoles through a Lewis Acid Catalyzed Union of 3-Ethoxycyclobutanones with Monosubstituted Hydrazines. *Org. Lett.* **13**, 1746–1749 (2011).

62. F. Pünner, Y. Sohtome, M. Sodeoka, Solvent-dependent copper-catalyzed synthesis of pyrazoles under aerobic conditions. *Chem. Commun.* **52**, 14093–14096 (2016).

63. V. V. Voronin, M. S. Ledovskaya, E. G. Gordeev, K. S. Rodygin, V. P. Ananikov, [3 + 2]-Cycloaddition of *in Situ* Generated Nitrile Imines and Acetylene for Assembling of 1,3-Disubstituted Pyrazoles with Quantitative Deuterium Labeling. *J. Org. Chem.* **83**, 3819–3828 (2018).

64. G.-Q. Jin, W.-X. Gao, Y.-B. Zhou, M.-C. Liu, H.-Y. Wu, Efficient synthesis of 2-aryl-2 *H* -indazoles by base-catalyzed benzyl C–H deprotonation and cyclization. *Chem. Commun.* **56**, 14617–14620 (2020).

65. A. C. Spivey, C. M. Diaper, H. Adams, A. J. Rudge, A New Germanium-Based Linker for Solid Phase Synthesis of Aromatics: Synthesis of a Pyrazole Library. *J. Org. Chem.* **65**, 5253–5263 (2000).

66. Liu, J. *et al.* Copper-mediated tandem ring-opening/cyclization reactions of cyclopropanols with aryldiazonium salts: synthesis of *N* -arylpyrazoles. *Chem. Commun.* **56**, 2202–2205 (2020).

67. C. Dunker, L. Imberg, A. I. Siutkina, C. Erbacher, C. G. Daniliuc, U. Karst, D. V. Kalinin, Pyrazole-Based Thrombin Inhibitors with a Serine-Trapping Mechanism of Action: Synthesis and Biological Activity. *Pharmaceuticals* **15**, 1340 (2022).

68. S. Grimme. Supramolecular binding thermodynamics by dispersion-corrected density functional theory. *Chem. Eur. J.* **18**, 9955-9964 (2012).

69. C. Y. Legault. CYLview, 1.0b; Université de Sherbrooke, **2009** (<http://www.cylview.org>).

70. T. Lu, F. Chen. Multiwfn: A multifunctional wavefunction analyzer. *J. Comput. Chem.* **33**, 580-592 (2012).

71. W. Humphrey, A. Dalke, K. Schulten. "VMD - Visual Molecular Dynamics" *J. Molec. Graphics*, **14**, 33-38 (1996).

72. E. F. Peterson, T. D. Goddard, C. C. Huang, E. C. Meng, G. S. Couch, T. I. Croll, J. H. Morris, T. E. Ferrin. “UCSF ChemieraX: Structure visualization for researchers, educators, and developers.” *Protein Sci*, **30**, 70-82 (2021).

73. A. D. Becke. Density‐functional thermochemistry. III. The role of exact exchange. *J. Chem. Phys.* **98**, 5648-5652 (1993).

74. S. Grimme, J. Antony, S. Ehrlich, H. A. Krieg. Consistent and accurate ab initio parametrization of density functional dispersion correction (DFT-D) for the 94 elements H-Pu. *J. Chem. Phys.* **132**, 154104 (2010).

75. S. Grimme. Semiempirical GGA-type density functional constructed with a long-range dispersion correction. *J. Comput. Chem.* **27**, 1787-1799 (2006).

76. A. Becke. Density-Functional Thermochemistry. V. Systematic Optimization of Exchange-Correlation Functionals. *J. Chem. Phys.* **107**, 8554-8560 (1997).

77. J. D. Chai, M. Head-Gordon. Long-range corrected hybrid density functionals with damped atom-atom dispersion corrections. *Phys. Chem. Chem. Phys.* **10**, 6615-6620 (2008).

78. F. Weigend, R. Ahlrichs. Balanced basis sets of split valence, triple zeta valence and quadruple zeta valence quality for H to Rn: Design and assessment of accuracy. *Phys. Chem. Chem. Phys.* **7**, 3297-3305 (2005).

79. A. V. Marenich, C. J. Cramer, D. G. Truhlar. Universal solvation model based on solute electron density and on a continuum model of the solvent defined by the bulk dielectric constant and atomic surface tensions. *J. Phys. Chem. B* **113**, 6378-6396 (2009).

80. A. J. Schaefer, V. M. Ingman, and S. E. Wheeler, "SEQCROW: A ChimeraX Bundle to Facilitate Quantum Chemical Applications to Complex Molecular Systems" *J. Comp. Chem.* **42**, 1750 (2021).

81. V. M. Ingman, A. J. Schaefer, L. R. Andreola, and S. E. Wheeler, "QChASM: Quantum Chemistry Automation and Structure Manipulation" *WIREs Comp. Mol. Sci*. **11**, e1510 (2021).

82. S. Parsons, H. D. Flack, T. Wagner, Use of intensity quotients and differences in absolute structure refinement. *Acta Crystallogr B Struct Sci Cryst Eng Mater* **69**, 249–259 (2013).

84. B. Lakshmi, U. Wefelscheid, U. Kazmaier, Synthesis of Aryl Stannanes from Silyl Triflates via Aryne Intermediates. *Synlett* **2011**, 345–348 (2011).
